# Supplementary material for: Acclimation of marine invertebrate osmolyte systems to low salinity: A systematic review & meta-analysis
Source: Frontiers journal article supplement (doi:10.3389/fmars.2022.934378), 2022-09-02
Supplement: Data_Sheet_1.DOCX [file Data_Sheet_1.DOCX]

**Supplementary Material**

**S1 – Search strings for systematic literature search**

1. ISI Web of Science:

Date of search: 13.04.2018

Search String:

(marine OR brackish OR estuar* OR coastal OR sea OR lagoon* OR benth* OR demersal OR shore* OR intertidal OR subtidal OR ocean* OR bay* OR cove* OR harbo* OR lake* OR pond* OR bog* OR stream* OR river* OR freshwater* OR creek* OR lotic OR lentic OR headwater* OR reservoir* OR brook* OR wetland* OR *pool* OR marsh* OR watershed* OR catchment* OR limnol* OR glacial* OR "inland waters")

AND (invertebrate OR macrofauna NOT plankton OR sponge OR porifera OR anthozo* OR anemone OR coral OR cnidaria* OR mollus* OR bivalv* OR gastropod* OR clam OR mussel OR snail OR slug OR polyplacophora OR cephalopod* OR polychaete OR worm OR annelid* OR chaetognat*OR entrproct* OR gastrotrich* OR hairyback OR hemichordat* OR kinorynch* OR "mud dragon" OR arthropod* OR nematod* OR nematomorph* OR nemert* OR phoronid* OR plathelminth* OR flatworm OR priapulid* OR sipuncul* OR xenacoelomorph* OR brachiopod* OR lampshells OR bryozo* OR "moss animal" OR "sea mat" OR ectoproct OR chordat* OR tunicat* OR urochordat* OR caphalochordat* OR lancelet* NOT teleost NOT mammal* NOT amphib* NOT reptile NOT vertebrat* OR insect* OR echinoderm* OR "sea star" OR "sea urchin" OR "sea cucumber" OR "feather star" OR crinoid* OR comatulid* OR "sand dollar" OR "sea lil*" OR "brittle star" OR crustac*)

AND (salin* OR "salt stress" OR osmolality OR osmotic OR osmolarity OR isoosmo* OR hypoosmo* OR osmoregulat* OR osmoconform*)

AND ( "Free amino acid" OR "amino acid" OR Methylamin* OR "methylated ammonium" OR Calcium OR Magnesium OR Bicarbonate OR Sodium Or Chloride OR betaine OR taurine OR alanine OR glycine OR Ion* OR Osmolyte* OR Electrolyte* OR "volume regulation" OR "cell volume") AND (extracell* OR blood OR hemolymph* OR haemolymph* OR "coelomic fluid" OR intracell* OR cell* OR tissue OR whole-body OR muscle OR gill OR mantle OR heart OR nerv*)

1. Google Scholar

Date of search: 24.04.2018

Search String:

(~osmoconformer OR "volume regulation"OR "cell volume")AND(~salinity OR osmolality OR osmotic) AND ("amino acid" OR Methylamine* OR ~Ion* OR ~Osmolyte*) AND (~invertebrate OR macrofauna -fish)AND(~marine OR brackish OR estuary* OR ~benthic OR ~freshwater)

Further settings:

• Without Citations and Patents

• From 1945 – 2018

1. **Scopus**

Date of search 30.01.2019

Search String:

( marine OR brackish OR estuar* OR coastal OR sea OR lagoon* OR benth* OR demersal OR shore* OR intertidal OR subtidal OR ocean* OR bay* OR cove* OR harbo* OR lake* OR pond* OR bog* OR stream* OR river* OR freshwater* OR creek* OR lotic OR lentic OR headwater* OR reservoir* OR brook* OR wetland* OR *pool* OR marsh* OR watershed* OR catchment* OR limnol* OR glacial* OR "inland waters" )

AND ( "Free amino acid" OR "amino acid" OR methylamin* OR "methylated ammonium" OR ion* OR osmolyte* OR electrolyte* OR "volume regulation" OR "cell volume" )

AND ( salin* OR "salt stress" OR osmolality OR osmotic OR osmolarity OR isoosmo* OR hypoosmo* OR osmoregulat* OR osmoconform* )

AND ( invertebrate OR macrofauna OR sponge OR porifera OR anthozo* OR anemone OR coral OR cnidaria* OR mollus* OR bivalv* OR gastropod* OR clam OR mussel OR snail OR slug OR polyplacophora OR cephalopod* OR polychaete OR worm OR annelid* OR chaetognat*or AND entrproct* OR gastrotrich* OR hairyback OR hemichordat* OR kinorynch* OR "mud dragon" OR arthropod* OR nematod* OR nematomorph* OR nemert* OR phoronid* OR plathelminth* OR flatworm OR priapulid* OR sipuncul* OR xenacoelomorph* OR brachiopod* OR lampshells OR bryozo* OR "moss animal" OR "sea mat" OR ectoproct OR chordat* OR tunicat* OR urochordat* OR caphalochordat* OR lancelet* OR echinoderm* OR "sea star" OR "sea urchin" OR "sea cucumber" OR "feather star" OR crinoid* OR comatulid* OR "sand dollar" OR "sea lil*" OR "brittle star" OR crustac* AND NOT plankton AND NOT copepod AND NOT human* AND NOT diatom AND NOT teleost AND NOT mammal* AND NOT amphib* AND NOT reptile AND NOT vertebrat* AND NOT insect* AND NOT algae AND NOT bacteria AND NOT archea AND NOT fish AND NOT plant AND NOT foraminifer* ) AND ( LIMIT-TO ( SUBJAREA , "AGRI" ) OR LIMIT-TO ( SUBJAREA , "ENVI" ) OR LIMIT-TO ( SUBJAREA , "BIOC" ) OR LIMIT-TO ( SUBJAREA , "MEDI" ) )

Further Settings:

- Search limited to biological research fields: Agricultural and Biological Sciences, Biochemistry, Genetics and Molecular Biology, Environmental Science, Medicine

• All years (oldest 1960)

• advanced search mode used
