# Supplementary material for: Acclimation of marine invertebrate osmolyte systems to low salinity: A systematic review & meta-analysis
Source: Frontiers journal article supplement (doi:10.3389/fmars.2022.934378), 2022-09-02
Supplement: Image_1.PDF [file Image_1.PDF]

**Fig. S1: Subgroup analysis – Class: Total Organics**

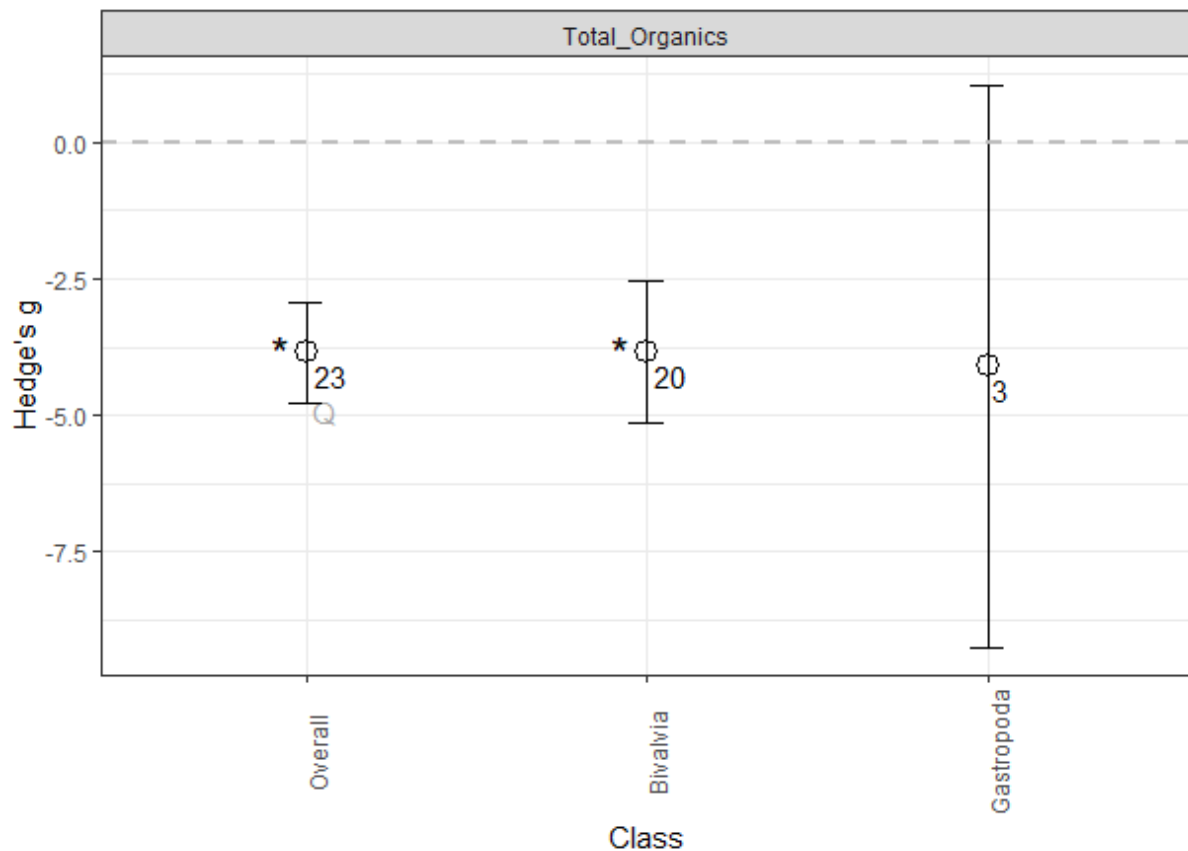

Fig. S1: Subgroup analysis - Effect of low salinity on total organic osmolyte concentration between molluscan classes Bivalvia and Gastropoda. Mean effect size is depicted as a circle with the error bars indicating robust confidence intervals (95%). If the confidence intervals do not overlap with zero an effect size is considered significant. An asterisk indicates a significant robust difference in effect size. Q indicates significant residual heterogeneity as tested with the random effects model. Numbers below circles indicate the number of studies.
