# Supplementary material for: Acclimation of marine invertebrate osmolyte systems to low salinity: A systematic review & meta-analysis
Source: Frontiers journal article supplement (doi:10.3389/fmars.2022.934378), 2022-09-02
Supplement: Table_1.XLSX [file Table_1.XLSX]

## Sheet: Outcome_low_k
Table S1 - List of excluded outcome variables. The table lists all potential outcome variables that were reported in the literature. The list shows whether requirements for meta-analysis were met and if not the reason for exclusion. When sample size was n ≤3, or data was derived from ≤3 studies, these outcome variables were not analysed further.
ID	Outcome	#Experiments	# Studies	Requirements for Meta-Analysis met?	Comment
1	2-Phosphoglycerate	3	1	no	n < 3
3	alpha-Aminoadipic acid	1	1	no	n < 3
4	alpha-Aminoisobuytric acid	1	1	no	n < 3
5	alpha-Methylhistidine	1	1	no	n < 3
7	Ammonium	1	1	no	n < 3
8	AMP	3	1	no	n = 3
9	Anserine	1	1	no	n < 3
13	ATP	4	2	no	substance not relevant
14	beta-Alanine	2	2	no	n < 3
15	beta-Aminoisobuytric acid	1	1	no	n < 3
17	Bicarbonate	3	1	no	n = 3
19	Carnitine	2	2	no	n < 3
21	Citrulline	1	1	no	n < 3
22	Cystathionine	1	1	no	n < 3
23	Cysteic acid	1	1	no	n < 3
24	Cysteine	1	1	no	n < 3
25	Cystine	1	1	no	n < 3
26	Dimethylsulfone	1	1	no	n < 3
27	gamma-Aminoisobuytric acid	2	2	no	n < 3
28	gamma-Methylhistidine	1	1	no	n < 3
32	Guanidinosuccinaate	2	1	no	n < 3
34	Homarine	1	1	no	n < 3
35	Homocysteine	1	1	no	n < 3
36	Homolysine-A	1	1	no	n < 3
37	Hydroxyacetone	3	1	no	n = 3
38	Hydroxyproline	1	1	no	n < 3
44	Methylamine	3	1	no	n = 3
49	Phosphatidylserine	1	1	no	n < 3
50	Phosphoserine	2	2	no	n < 3
53	Proline-Betaine	1	1	no	n < 3
54	Sarcosine	1	1	no	n < 3
57	Succinate	2	2	no	n < 3
60	TMAO	3	1	no	n = 3
64	Urea	2	1	no	n < 3
65	Uric Acid	1	1	no	n < 3
2	Alanine	34	22	yes
6	Ammonia	8	4	yes
10	Arginine	12	10	yes
11	Asparagine	3	2	yes
12	Aspartate	20	14	yes
16	Betaine	9	6	yes
18	Calcium	19	9	yes
20	Chloride	29	17	yes
29	Glutamate	27	18	yes
30	Glutamine	14	8	yes
31	Glycine	33	22	yes
33	Histidine	7	5	yes
39	Isoleucine	7	5	yes
40	Leucine	7	5	yes
41	Lysine	10	7	yes
42	Magnesium	16	10	yes
43	Methionine	6	4	yes
45	O-Phosphocholine	5	2	yes
46	O-Phosphoserine	6	3	yes
47	Ornithine	6	5	yes
48	Phenylalanine	7	5	yes
51	Potassium	36	25	yes
52	Proline	13	12	yes
55	Serine	19	15	yes
56	Sodium	35	17	yes
58	Taurine	31	18	yes
59	Threonine	14	7	yes
61	Total Organics	35	19	yes
62	Total Osmolality	38	21	yes
63	Tyrosine	6	4	yes
66	Valine	7	5	yes
