# Supplementary material for: Acclimation of marine invertebrate osmolyte systems to low salinity: A systematic review & meta-analysis
Source: Frontiers journal article supplement (doi:10.3389/fmars.2022.934378), 2022-09-02
Supplement: Table_2.XLSX [file Table_2.XLSX]

## Sheet: ReferenceList_excluded
Table S2 - FILTERED REFERENCE LIST includes all references judged acceptable based on title and abstract, but excluded during full-exam because they did not pass the neccessary inclusion criteria
Selection criteria for inclusion in meta-analyses. Criteria for exclusion are listed in columns 'D-T.' An 'x' under the Selection Criteria columns indicates that the experiment did not meet the inclusion criteria. Irrelevant indicates that there was no relevant response data in the study. No original data means that no original results were shown. 'F-G' cover the study organism which was not aqua…
			Selection criteria for inclusion in meta‐analyses.
Reference ID	Authors/Year	Title/Journal/ Pages/ DOI	Irrelevant data	No original data	Not aquatic	No osmoconformer	No salinity treatment	Salinity unknown	Salinity not steady	Short-term treatment	Acclimation time not reported	No multiple salinity treatments	Missing control	Lack of relevant treatment	Variation not reported	No replication	Sample size not reported	Correlation coefficient not given	Other
1	Akberali, H. B., Marriott, K. R. M., & Trueman, E. R. (1977).	Calcium utilisation during anaerobiosis induced by osmotic shock in a bivalve mollusc. Nature, 266(5605), 266852a0. https://doi.org/10.1038/266852a0													x
2	Abbott, W., & Awapara, J. (1960).	Sulfur metabolism in the lugworm, Arenicola cristata Stimpson. The Biological Bulletin, 119(3), 357–370.					x	x
3	Abe, H. (2002).	Distribution, metabolism and physiological functions of free D-amino acids in aquatic invertebrates. Bulletin of the Japanese Society of Scientific Fisheries (Japan). http://agris.fao.org/agris-search/search.do?recordID=JP2003000648								x
4	Ackermann, D. (1955).	Über das Vorkommen von Homarin, Taurocyamin, Cholin, Lysin und anderen Aminosäuren sowie Bernsteinsäure in dem Meereswurm Arenicola marina. Hoppe-Seyler\’ s Zeitschrift für physiologische Chemie, 302(1–2), 80–86.					x
5	Ackermann, D., & Janka, R. (1954a).	Neues Vorkommen von Mytilit bei Avertebraten (Cionia intestinalis). Hoppe-Seyler’ s Zeitschrift für physiologische Chemie, 296(1), 283–286.					x
6	Ackermann, D., & Janka, R. (1954b).	Über das Vorkommen von Homarin, Glykokollbetain, Cholin, Arginin, Mytilit, Taurin und d, l-Milchsäure in der Meeresschnecke Patella sp. Hoppe-Seyler’ s Zeitschrift für physiologische Chemie, 298(1), 65–69.					x
7	Adolph, E. F. (1936).	Differential permeability to water and osmotic exchanges in the marine worm Phascolosoma. Journal of Cellular and Comparative Physiology, 9(1), 117–135. https://doi.org/10.1002/jcp.1030090111								x
8	Ahearn, H. R. H., Ahearn, G. A., & Gomme, J. (2000).	INTEGUMENTARY L-HISTIDINE TRANSPORT IN A EURYHALINE POLYCHAETE WORM: REGULATORY ROLES OF CALCIUM AND CADMIUM IN THE TRANSPORT EVENT. The Journal of Experimental Biology 203, 2877–2885.								x
9	Aladin, N. (1983).	On displacement of the critical salinity barrier in the Caspian and Aral Seas, the Branchiopoda and Ostracoda taken as examples. Zool Z, 62, 689–694.																	Language
10	Aladin, N. V., & Potts, W. T. W. (1995).	Osmoregulatory capacity of the Cladocera. Journal of Comparative Physiology B, 164(8), 671–683. https://doi.org/10.1007/BF00389810					x				x
11	Allen, J. A., & Garrett, M. R. (1971).	Taurine in Marine Invertebrates. In F. S. Russell & M. Yonge (Hrsg.), Advances in Marine Biology (Bd. 9, S. 205–253). Academic Press. https://doi.org/10.1016/S0065-2881(08)60343-0		x
12	Allen, K. (1961a).	Amino acids in the Mollusca. American Zoologist, 253–261.		x						x
13	Allen, K. (1961b).	THE EFFECT OF SALINITY ON THE AMINO ACID CONCENTRATION IN RANGIA CUNEATA (ELECYPODA). The Biological Bulletin, 121(3), 419–424.								x
14	Amado, E. M., Freire, C. A., Grassi, M. T., & Souza, M. M. (2012).	Lead hampers gill cell volume regulation in marine crabs: Stronger effect in a weak osmoregulator than in an osmoconformer. Aquatic Toxicology, 106–107, 95–103. https://doi.org/10.1016/j.aquatox.2011.10.012								x
15	Amado, E. M., Vidolin, D., Freire, C. A., & Souza, M. M. (2011).	Distinct patterns of water and osmolyte control between intertidal (Bunodosoma caissarum) and subtidal (Anemonia sargassensis) sea anemones. Comparative Biochemistry and Physiology A-Molecular & Integrative Physiology, 158(4), 542–551. https://doi.org/10.1016/j.cbpa.2010.12.019								x
16	Amende, L. M., & Pierce, S. K. (1980b).	Free amino acid mediated volume regulation of isolated Noetia ponderosa red blood cells: Control by Ca 2+ and ATP. Journal of Comparative Physiology B: Biochemical, Systemic, and Environmental Physiology, 138(4), 291–298.								x
17	Anderson, J. W., & Bedford, W. B. (1973).	The physiological response of the estuarine clam, Rangia cuneata (Gray), to salinity. II. Uptake of glycine. The Biological Bulletin, 144(2), 229–247.								x
18	Apte, S., Khoury, F., Roth, W., & Schlichter, D. (1996).	Transport of amino acids into freshly isolated cells from a sea anemone. Endocytobiosis and Cell Research, 11(2–3), 129–146.	x							x
19	Asuvapongpatana, S., Weerachatyanukul, W., Buranajitpirom, D., Watthammawut, A., Wongtripop, S., & Withyachumnarnkul, B. (2013).	Salinity tolerance of cross-breed shrimp families: Morphological and biochemical approaches. Aquaculture Research, 44(7), 1152–1161. https://doi.org/10.1111/are.12162	x			x
20	Augusto, A., Pinheiro, A. S., Greene, L. J., Laure, H. J., & McNamara, J. C. (2009).	Evolutionary transition to freshwater by ancestral marine palaemonids: Evidence from osmoregulation in a tide pool shrimp. Aquatic Biology, 7(1–2), 113–122. https://doi.org/10.3354/ab00183								x
21	Aunaas, T., Denstad, J.-P., & Zachariassen, K. E. (1988).	Ecophysiological importance of the isolation response of hibernating blue mussels (Mytilus edulis). Marine Biology, 98(3), 415–419. https://doi.org/10.1007/BF00391117							x			x
22	Awapara, J. (1962).	Free amino acids in invertebrates: A comparative study of their distribution and metabolism. Amino acid pools, 158–175.		x			x
23	Babarro, J. M. F., Reiriz, M. J. F., Labarta, U., & Garrido, J. L. (2011).	Variability of the total free amino acid (TFAA) pool in Mytilus galloprovincialis cultured on a raft system. Effect of body size. Aquaculture Nutrition, 17(2), e448–e458. https://doi.org/10.1111/j.1365-2095.2010.00781.x										x
24	Babarro, J. M., Reiriz, M. J. F., Garrido, J. L., & Labarta, U. (2006).	Free amino acid composition in juveniles of Mytilus galloprovincialis: Spatial variability after Prestige oil spill. Comparative Biochemistry and Physiology Part A: Molecular & Integrative Physiology, 145(2), 204–213.											x
25	Bablanian, G. M., & Treistman, S. N. (1985).	The effect of hyperpolarization of cell R15 on the hemolymph composition of intactAplysia. Journal of Comparative Physiology B, 155(3), 297–303. https://doi.org/10.1007/BF00687471								x
26	Baginski, R. M., & Pierce, S. K. (1977).	The time course of intracellular free amino acid accumulation in tissues of Modiolus demissus during high salinity adaptations. Comparative Biochemistry and Physiology Part A: Physiology, 57(4), 407–412. https://doi.org/10.1016/0300-9629(77)90137-2										x
27	Baginski, R. M., & Pierce, S. K. (1978).	A comparison of amino acid accumulation during high salinity adaptation with anaerobic metabolism in the ribbed mussel, Modiolus demissus demissus. Journal of Experimental Zoology Part A: Ecological Genetics and Physiology, 203(3), 419–428.										x
28	Baldwin Ernest, & Needham Dorothy Mary Moyle. (1937).	A contribution to the comparative biochemistry of muscular and electrical tissues. Proceedings of the Royal Society of London. Series B - Biological Sciences, 122(827), 197–219. https://doi.org/10.1098/rspb.1937.0021					x
29	Baldwin, E., & Yudkin, W. H. (1950).	The annelid phosphagen: With a note on phosphagen in Echinodermata and Protochordata. Proceedings of the Royal Society of London. Series B-Biological Sciences, 136(885), 614–631.					x	x
30	Ballantyne, J. S., & Moyes, C. D. (1987).	Osmotic effects on fatty acid, pyruvate, and ketone body oxidation in oyster gill mitochondria. Physiological zoology, 60(6), 713–721.	x
31	Bamford, D. R., & McCrea, R. (1975).	Active absorption of neutral and basic amino acids by the gill of the common cockle, Cerastoderma edule. Comparative Biochemistry and Physiology Part A: Physiology, 50(4), 811–817. https://doi.org/10.1016/0300-9629(75)90149-8	x				x
32	Barnes, H., & Blackstock, J. (1975).	Studies in the biochemistry of cirripede eggs. IV. The free Amino-acid pool in the eggs of Balanus balanoides (L.) and B. balanus (L.) during development. Journal of Experimental Marine Biology and Ecology, 19(1), 59–79.					x
33	Bartberger, C. A., & Pierce Jr, S. K. (1976).	Relationship between ammonia excretion rates and hemolymph nitrogenous compounds of a euryhaline bivalve during low salinity acclimation. The Biological Bulletin, 150(1), 1–14.								x
34	Bassindale, R. (1942).	The Distribution of Amphipods in the Severn Estuary and Bristol Channel. Journal of Animal Ecology, 11(1), 131–144. JSTOR. https://doi.org/10.2307/1305	x
35	Battaglia, B., & Bryan, G. W. (1964).	Some Aspects of Ionic and Osmotic Regulation in Tisbe [Copepoda, Harpacticoida] in Relation to Polymorphism and Geographical Distribution. Journal of the Marine Biological Association of the United Kingdom, 44(1), 17–31. https://doi.org/10.1017/S0025315400024632								x
36	Beadle, L. C. (1931).	The Effect of Salinity Changes on the Water Content and Respiration of Marine Invertebrates. Journal of Experimental Biology, 8(3), 211–227.	x							x
37	Beadle, L. C. (1934).	Osmotic Regulation in Gunda ulvae. Journal of Experimental Biology, 11(4), 382–396.				x				x
38	Beadle, L. C. (1937).	Adaptation to Changes of Salinity in the Polychaetes: I. Control of Body Volume and of Body Fluid Concentration in Nereis Diversicolor. Journal of Experimental Biology, 14(1), 56–70.								x
39	Beadle, L. C., & Cragg, J. B. (1940).	Studies on Adaptation to Salinity in Gammarus Spp: 1. Regulation of Blood and Tissues and the Problem of Adaptation to Fresh Water. Journal of Experimental Biology, 17(2), 153–163.								x
40	Bedford, J. J. (1971).	Osmoregulation in Melanopsis trifasciata—IV. The possible control of intracellular isosmotic regulation. Comparative Biochemistry and Physiology Part A: Physiology, 40(4), 1015–1027. https://doi.org/10.1016/0300-9629(71)90291-X								x
41	Bedford, J. J. (1972).	Osmoregulation in Melanopsis trifasciata. II. The osmotic pressure and the principal ions of the hemocoelic fluid. Physiological Zoology, 45(3), 261–269.								x
42	Bedford, J. J. (1973).	Osmotic Relationships in a Freshwater Mussel, Hyridella Menziesi Gray (Lamellibranchia: Unionidae). Archives Internationales de Physiologie et de Biochimie, 81(5), 819–831. https://doi.org/10.3109/13813457309074486												x					Freshwater species
43	Bellamy, D., & Jones, I. C. (1961).	Studies on Myxine glutinosa—I. The chemical composition of the tissues. Comparative Biochemistry and Physiology, 3(3), 175–183. https://doi.org/10.1016/0010-406X(61)90053-6										x
44	Bellis, S., Davis, J. P., & Stephens, G. C. (1987).	The lack of an effect of magnesium on the uptake of amino acids by the sea urchin Strongylocentrotus purpuratus. Journal of Experimental Zoology, 244(3), 383–388. https://doi.org/10.1002/jez.1402440305								x
45	Belyaev, G. M. (1957).	Physiological characteristics of representatives of the same species in waters of different degrees of salinity. Trudy Vsesoyuznogo Gidrobiologischeskogo Obshchestva (Akad. Nauk SSSR), 8, 321–353.								x
46	Benson, J., & Treherne, J. (1978).	Axonal Adaptations to Osmotic and Ionic Stress in an Invertebrate Osmoconformer (Mercierella Enigmatica Fauvel): III. Adaptations to Hyposmotic Dilution. Journal of Experimental Biology, 76(1), 221–235.	x
47	Beres, L. S., & Pierce, S. K. (1981).	The effects of salinity stress on the electrophysiological properties of Mya arenaria neurons. Journal of Comparative Physiology, 144(2), 165–173. https://doi.org/10.1007/BF00802754	x
48	Berger, V. (1989).	On the adaptation of molluscs to increased salinityBerger1989.pdf. Biologiia moria., 2, 30–35.												x					hyperosmotic stress
49	Berger, E. (1930).	Unterschiedliche Wirkungen gleicher Ionen und Ionengemische auf verschiedene Tierarten. Pflüger’s Archiv für die gesamte Physiologie des Menschen und der Tiere, 223(1), 1–39. https://doi.org/10.1007/BF01794065	x
50	Berger, V. J., & Kharazova, A. D. (1997).	Mechanisms of salinity adaptations in marine molluscs. Interactions and Adaptation Strategies of Marine Organisms, 115–126.		x
51	Berger, V. Y., Naumov, A. D., & Babkov, A. I. (1995).	The relationship of abundance and diversity of marine benthos to environmental salinity. Russian Journal of Marine Biology, 21, 41–46.	x
52	Bethe, A., & Berger, E. (1931).	Variationen im Mineralbestand verschiedener Blutarten. Pflüger’s Archiv für die gesamte Physiologie des Menschen und der Tiere, 227(1), 571–584. https://doi.org/10.1007/BF01755356					x				x
53	Bethe, Albrecht. (1929).	Ionendurchlässigkeit der Körperoberfläche von wirbellosen Tieren des Meeres als Ursache der Giftigkeit von Seewasser abnormer Zusammensetzung. Pflüger’s Archiv für die gesamte Physiologie des Menschen und der Tiere, 221(1), 344–362. https://doi.org/10.1007/BF01793988				x
54	Bialaszewicz, K. (1933).	Contribution A L’étude de la Composition Minérale des Liquides Nourriciers Chez Les Animaux Marins. Archives Internationales de Physiologie, 36(1), 41–53. https://doi.org/10.3109/13813453309142367									x
55	Bialaszewicz, K., & Kupfer, Ch. (1936).	De La Composition Minérale Des Muscles Des Animaux Marins. Archives Internationales de Physiologie, 42(3), 398–404. https://doi.org/10.3109/13813453609146182					x
56	Binyon, J. (1962).	Ionic regulation and mode of adjustment to reduced salinity of the starfish Asterias rubens L. Journal of the Marine Biological Association of the United Kingdom, 42(1), 49–64.										x
57	Binyon, J. (1978).	Some observations upon the chemical composition of the starfish asterias rubens l., with particular reference to strontium uptake. Journal of the Marine Biological Association of the United Kingdom, 58(2), 441–449. Scopus. https://doi.org/10.1017/S0025315400028101										x
58	Bishop, S. H., Greenwalt, D. E., Kapper, M. A., Paynter, K. T., & Ellis, L. L. (1994b).	Metabolic regulation of proline, glycine, and alanine accumulation as intracellular osmolytes in ribbed mussel gill tissue. Journal of Experimental Zoology Part A: Ecological Genetics and Physiology, 268(2), 151–161.										x
59	Bishop, S. H. (1976).	Nitrogen metabolism and excretion: Regulation of intracellular amino acid concentrations. In Estuarine Processes: Uses, Stresses, and Adaptation to the Estuary (S. 414–431). Elsevier.		x
60	Bishop, S. H., Greenwalt, D. E., & Burcham, J. M. (1981).	Amino acid cycling in ribbed mussel tissues subjected to hyperosmotic shock. Journal of Experimental Zoology Part A: Ecological Genetics and Physiology, 215(3), 277–287.										x
61	Blank, M., Bastrop, R., Röhner, M., & Jürss, K. (2004).	Effect of salinity on spatial distribution and cell volume regulation in two sibling species of Marenzelleria (Polychaeta: Spionidae). Marine Ecology Progress Series, 271, 193–205. https://doi.org/10.3354/meps271193	x
62	Bowlus, R. D., & Somero, G. N. (1979).	Solute compatibility with enzyme function and structure: Rationales for the selection of osmotic agents and end-products of anaerobic metabolism in marine invertebrates. Journal of Experimental Zoology, 208(2), 137–151. https://doi.org/10.1002/jez.1402080202	x
63	Boyle, P. R. (1967).	Physiological and Behavioural Studies on the Ecology of some New Zealand Chitons [PhD Thesis]. ResearchSpace@ Auckland.								x
64	Bradley, T. (1987).	Physiology of osmoregulation in mosquitoes. Annual review of entomology, 32(1), 439–462.	x			x
65	Buckeridge, J. S. (2012).	Opportunism and the resilience of barnacles (Cirripedia: Thoracica) to environmental change. Integrative Zoology, 7(2), 137–146. https://doi.org/10.1111/j.1749-4877.2012.00286.x	x
66	Bullaro, C. E. (1969).	OSMOTIC RESPONSES OF TWO SPECIES- OF SIPUNCULIDS TO DIFFERENT SALINITIES AND TEMPERATURES.								x
67	Burcham, J. M. (1983).	Amino acid catabolism by ribbed mussel (Modiolus demissus) gill tissue: Studies on isolated mitochondria and the L-amino acid oxidase.	x
68	Burg, M. B., & Ferraris, J. D. (2008).	Intracellular Organic Osmolytes: Function and Regulation. Journal of Biological Chemistry, 283(12), 7309–7313. https://doi.org/10.1074/jbc.R700042200		x
69	Burger, J. W. (1957).	The general form of excretion in the lobster, homarus. The Biological Bulletin, 113(2), 207–223. https://doi.org/10.2307/1539079				x
70	Burnett, L., Terwilliger, N., Carroll, A., Jorgensen, D., & Scholnick, D. (2002).	Respiratory and acid-base physiology of the purple sea urchin, Strongylocentrotus purpuratus, during air exposure: Presence and function of a facultative lung. Biological Bulletin, 203(1), 42–50. https://doi.org/10.2307/1543456								x
71	Bursey, C. R. (1982).	Salinity Tolerance and Osmotic Response in Two Species of Spider Crabs of the Genus Libinia (Decapoda Brachyura, Majidae). Crustaceana, 42(1–3), 194–200. Scopus. https://doi.org/10.1163/156854082X00867								x
72	Bursey, C. R., & Harmer, J. A. (1979).	Induced changes in the osmotic concentration of the coelenteron fluid of the sea anemone Condylactis gigantea. Comparative Biochemistry and Physiology Part A: Physiology, 64(1), 73–76. https://doi.org/10.1016/0300-9629(79)90432-8								x
73	Camien, M. N., Sarlet, H., Duchâteau, G., & Florkin, M. (1951).	Non-Protein Amino Acids in Muscle and Blood of Marine and Fresh Water Crustacea. Journal of Biological Chemistry, 193(2), 881–885.					x
74	Campillo, J. A., Sevilla, A., Albentosa, M., Bernal, C., Lozano, A. B., Cánovas, M., & León, V. M. (2015).	Metabolomic responses in caged clams, Ruditapes decussatus, exposed to agricultural and urban inputs in a Mediterranean coastal lagoon (Mar Menor, SE Spain). Science of The Total Environment, 524–525, 136–147. https://doi.org/10.1016/j.scitotenv.2015.03.136										x
75	Cantelmo, A. C., Cantelmo, F. R., & Langsam, D. M. (1975).	Osmoregulatory ability of the rock crab, Cancer irroratus, under osmotic stress. Comparative Biochemistry and Physiology Part A: Physiology, 51(3), 537–542. https://doi.org/10.1016/0300-9629(75)90338-2									x
76	Cao, C., & Wang, W.-X. (2017).	Copper-induced metabolic variation of oysters overwhelmed by salinity effects. Chemosphere, 174, 331–341. https://doi.org/10.1016/j.chemosphere.2017.01.150	x
77	Carley, W. W. (1975).	Effects of brain removal on integumental water permeability and ion content of the earthworm Lumbricus terrestris L. General and Comparative Endocrinology, 27(4), 509–516. https://doi.org/10.1016/0016-6480(75)90071-4	x
78	Carley, W. W., Caracciolo, E. A., & Mason, R. T. (1983).	Cell and coelomic fluid volume regulation in the earthworm Lumbricus terrestris. Comparative Biochemistry and Physiology Part A: Physiology, 74(3), 569–575. https://doi.org/10.1016/0300-9629(83)90549-2								x
79	Carlyle, R. F. (1974).	The occurrence in and actions of amino acids on isolated supra oral sphincter preparations of the sea anemone Actinia equina. The Journal of Physiology, 236(3), 635–652.						x
80	Carr, R. S., & Neff, J. M. (1984).	Field assessment of biochemical stress indices for the sandworm Neanthes virens (Sars). Marine Environmental Research, 14(1–4), 267–279. https://doi.org/10.1016/0141-1136(84)90082-5					x
81	Carr, W. E., Netherton, J. C., Gleeson, R. A., & Derby, C. D. (1996).	Stimulants of feeding behavior in fish: Analyses of tissues of diverse marine organisms. The biological bulletin, 190(2), 149–160.						x
82	Castell, J. D., Kennedy, E. J., Robinson, S. M. C., Parsons, G. J., Blair, T. J., & Gonzalez-Duran, E. (2004).	Effect of dietary lipids on fatty acid composition and metabolism in juvenile green sea urchins (Strongylocentrotus droebachiensis). Aquaculture, 242(1), 417–435. https://doi.org/10.1016/j.aquaculture.2003.11.003	x
83	Castellano, G. C., Santos, I. A., & Freire, C. A. (2018).	Maintenance of ionic gradients and tissue hydration in the intertidal sea cucumber Holothuria grisea under hypo- and hyper-salinity challenges. Journal of the Marine Biological Association of the United Kingdom, 98(2), 325–332. https://doi.org/10.1017/S0025315416001314								x		x
84	Castellano, G. C., Souza, M. M., & Freire, C. A. (2016).	Volume regulation of intestinal cells of echinoderms: Putative role of ion transporters (Na+/K+-ATPase and NKCC). Comparative Biochemistry and Physiology Part A: Molecular & Integrative Physiology, 201, 124–131. https://doi.org/10.1016/j.cbpa.2016.07.006	x							x
85	Chew, S. F., Ho, S. Y., & Ip, Y. K. (1999).	Free amino acids and osmoregulation in the intertidal pulmonate Onchidium tumidium. Marine Biology, 134(4), 735–741. https://doi.org/10.1007/s002270050590										x
86	Chew, Shit F., Peng, K. W., Low, W. P., & Ip, Y. K. (1994).	Differences in the responses between tissues of the body wall and the internal organs of Phascolosoma arcuatum (Sipuncula) to changes in salinity. Comparative Biochemistry and Physiology Part A: Physiology, 107(1), 141–147. https://doi.org/10.1016/0300-9629(94)90286-0								x
87	Cholette, C., Gagnon, A., & Germain, P. (1970).	Isosmotic adaptation in Myxine glutinosa L. —I. Variations of some parameters and role of the amino acid pool of the muscle cells. Comparative Biochemistry and Physiology, 33(2), 333–346. https://doi.org/10.1016/0010-406X(70)90354-3										x
88	Cholette, C., & Gagnon, A. (1973).	Isosmotic adaptation in Myxine glutinosa L.—II. Variations of the free amino acids, trimethylamine oxide and potassium of the blood and muscle cells. Comparative Biochemistry and Physiology Part A: Physiology, 45(4), 1009–1021. https://doi.org/10.1016/0300-9629(73)90338-1										x
89	Ciereszko, L. S., Odense, P. H., & Schmidt, R. W. (1960).	Chemistry of coelenterates. II. Occurrence of taurobetaine and creatine in gorgonians. Annals of the New York Academy of Sciences, 90(1), 920–922.	x				x	x
90	Clark, Mary E. (1968).	Free amino-acid levels in the coelomic fluid and body wall of polychaetes. The Biological Bulletin, 134(1), 35–47.										x
91	Clark, G. A. (1982).	Chloride ion and water balance in the prosobranch gastropod Collisella persona [PhD Thesis]. University of British Columbia.								x
92	Clark, M. E. (1985).	The Osmotic Role of Amino Acids: Discovery and Function. In Raymond Gilles & M. Gilles-Baillien (Hrsg.), Transport Processes, Iono- and Osmoregulation (S. 412–423). Springer Berlin Heidelberg. https://doi.org/10.1007/978-3-642-70613-4_35		x
93	Clauss, W. G. (2001).	Epithelial transport and osmoregulation in annelids. Canadian Journal of Zoology, 79(2), 192–203. https://doi.org/10.1139/z00-200	x
94	Clements, L. A. J., & Hilbish, T. J. (1991).	Comparison of fluorescamine and o-phthaldialdehyde methods for measuring amino acid exchange in marine organisms. Limnology and oceanography, 36(7), 1463–1471.					x
95	Cobb, J. L. S., & Moore, A. (1988).	Studies on the ionic basis of the action potential in the brittle-star, Ophiura ophiura. Comparative Biochemistry and Physiology Part A: Physiology, 91(4), 821–825. https://doi.org/10.1016/0300-9629(88)90970-X	x
96	Cole, W. H. (1940).	THE COMPOSITION OF FLUIDS AND SERA OF SOME MARINE ANIMALS AND OF THE SEA WATER IN WHICH THEY LIVE. The Journal of General Physiology, 23(5), 575–584.				x						x
97	Collip, J. B. (1920).	Studies on molluscan celomic fluid. Effect of change in environment on the carbon dioxide content of the celomic fluid. Anaerobic respiration in Mya arenaria. J. biol. Chem, 45, 23–49.											x
98	Cornell, J. C. (1979).	Salt and water balance in two marine spider crabs, libinia emarginata and pugettia producta. I. Urine production and magnesium regulation. The Biological Bulletin, 157(2), 221–233. https://doi.org/10.2307/1541050	x
99	Cortes, M. P., Chung, H.-M., & Pomory, C. M. (2015).	Sediment preference, salinity tolerance and COX-1 genetic differences in two purportive species of Luidia (Echinodermata: Asteroidea). Journal of the Marine Biological Association of the United Kingdom, 95(3), 551–559. https://doi.org/10.1017/S0025315414001817	x
100	Costa, C. J., & Pritchard, A. W. (1978).	The response of Mytilus edulis to short duration hypoosmotic stress. Comparative Biochemistry and Physiology Part A: Physiology, 61(1), 149–155. https://doi.org/10.1016/0300-9629(78)90292-X								x
101	Crowe, J. H. (1981).	Transport of exogenous substrate and cell volume regulation in bivalve molluscs. Journal of Experimental Zoology, 215(3), 363–370. https://doi.org/10.1002/jez.1402150313		x
102	Crowe, J. H., Dickson, K. A., Otto, J. L., Colón, R. D., & Farley, K. K. (1977).	Uptake of amino acids by the mussel Modiolus demissus. Journal of Experimental Zoology, 202(3), 323–332. https://doi.org/10.1002/jez.1402020304	x
103	Curtis, D. L., Jensen, E. K., & McGaw, I. J. (2007).	Behavioral influences on the physiological responses of Cancer gracilis, the graceful crab, during hyposaline exposure. Biological Bulletin, 212(3), 222–231. Scopus. https://doi.org/10.2307/25066604								x
104	Dailey, M. E., Fremont-Smith, F., & Carroll, M. P. (1931).	The relative composition of sea water and of the blood of Limulus polyphemus. Journal of Biological Chemistry, 93, 17–24.				x
105	Dall, W. (1974).	Osmotic and ionic regulation in the western rock lobster Panulirus longipes (Milne-Edwards). Journal of Experimental Marine Biology and Ecology, 15(1), 97–125. https://doi.org/10.1016/0022-0981(74)90066-5								x
106	Dall, W. (1975).	The rôle of ninhydrin-positive substances in osmoregulatton in the western rock lobster, Panuliris longipes (Milne Edwards). Journal of Experimental Marine Biology and Ecology, 19(1), 43–58. https://doi.org/10.1016/0022-0981(75)90036-2								x
107	Davenport, J. (1972).	Volume changes shown by some littoral anomuran crustacea. Journal of the Marine Biological Association of the United Kingdom, 52(4), 863–877. Scopus. https://doi.org/10.1017/S0025315400040601								x
108	Davenport, J. (1976).	A comparative study of the behaviour of some balanomorph barnacles exposed to fluctuating sea water concentrations. Journal of the Marine Biological Association of the United Kingdom, 56(4), 889–907. Scopus. https://doi.org/10.1017/S0025315400020932	x
109	Davenport, J. (1985).	Osmotic control in marine animals. Symposia of the Society for Experimental Biology, 39, 207–244.		x
110	Davenport, J., & Beard, J. B. (1988).	Observations on the temperature and salinity relations of lasaea rubra. Journal of the Marine Biological Association of the United Kingdom, 68(1), 15–23. Scopus. https://doi.org/10.1017/S0025315400050062								x
111	Davenport, J., & Wankowski, J. (1973).	Pre-immersion salinity-choice behaviour in Porcellana platycheles. Marine Biology, 22(4), 313–316. https://doi.org/10.1007/BF00391387	x
112	Davenport, J., Gruffydd, D., & Beaumont, A. R. (1975).	An apparatus to supply water of fluctuating salinity and its use in a study of the salinity tolerances of larvae of the scallop Pecten maximus L. Journal of the Marine Biological Association of the United Kingdom, 55(2), 391–409.	x
113	Davenport, John. (1979).	Is Mytilus edulis a short term osmoregulator? Comparative Biochemistry and Physiology Part A: Physiology, 64(1), 91–95. https://doi.org/10.1016/0300-9629(79)90436-5								x
114	Davis, J. P., Keenan, C. L., & Stephens, G. C. (1985).	Na+-dependent amino acid transport in bacteria-free sea urchin larvae. Journal of Comparative Physiology B, 156(1), 121–127. https://doi.org/10.1007/BF00692934	x
115	De Jorge, F. B., Petersen, J. A., Ditadi, A. S. F., & Sawaya, P. (1966).	Biochemical studies in a eunicid (polychaete) of the littoral of São Paulo, Brazil. Comparative Biochemistry and Physiology, 17(2), 535–551. https://doi.org/10.1016/0010-406X(66)90585-8										x
116	De Jorge, F. B., Petersen, J. A., & Ditadi, A. S. F. (1970).	Comparative biochemical studies in Sipunculus natans and Sipunculus multisulcatus (Sipuncula). Comparative Biochemistry And Physiology, 35(1), 163–177. Scopus. https://doi.org/10.1016/0010-406X(70)90919-9										x
117	De Jorge, F. B., & Ditadi, A. S. F. (1969).	Biochemical studies on Lissomyema exilii (F. Müller, 1883),(Echiura). Comparative Biochemistry and Physiology, 28(2), 817–827.										x
118	De Leersnyder, M. (1971).	Sur la régulation ionique du milieu intérieur de Nereis diversicolor O.F. Müller = On the ionic regulation of the internal medium of Nereis diversicolor O.F. Mueller. Cahiers de Biologie Marine, 1. http://www.vliz.be/en/imis?refid=58724								x
119	Deaton, Lewis E., & Greenberg, M. J. (1986).	There is no horohalinicum. Estuaries, 9(1), 20. https://doi.org/10.2307/1352189		x
120	Deaton, L. E., Hilbish, T. J., & Koehn, R. K. (1984).	Protein as a source of amino nitrogen during hyperosmotic volume regulation in the mussel Mytilus edulis. Physiological zoology, 57(6), 609–619.								x
121	Deaton, L. E. (1990).	Potentiation of hypoosmotic cellular volume regulation in the quahog, Mercenaria mercenaria, by 5-hydroxytryptamine, FMRFamide, and phorbol esters. The Biological bulletin, 178(3), 260–266.								x
122	Deaton, L. E. (1994).	Hypoosmotic volume regulation in bivalves: Protein kinase C and amino acid release. Journal of Experimental Zoology Part A: Ecological Genetics and Physiology, 268(2), 145–150.								x
123	Deaton, Lewis E., & Pierce, S. K. (1994).	Introduction: Cellular volume regulation—mechanisms and control. Journal of Experimental Zoology, 268(2), 77–79.	x
124	Deaton, L. E. (1997).	Comparative aspects of cellular-volume regulation in cardiomyocytes. Physiological Zoology, 70(4), 379–390. https://doi.org/10.1086/515850		x
125	Deaton, Lewis E. (2001).	Hyperosmotic volume regulation in the gills of the ribbed mussel, Geukensia demissa: Rapid accumulation of betaine and alanine. Journal of Experimental Marine Biology and Ecology, 260(2), 185–197. https://doi.org/10.1016/S0022-0981(01)00237-4								x
126	Deffner, G. G. J. (1961).	The dialyzable free organic constituents of squid blood; a comparison with nerve axoplasm. Biochimica et Biophysica Acta, 47(2), 378–388. https://doi.org/10.1016/0006-3002(61)90298-0						x
127	Deffner, G. G. J., & Hafter, R. E. (1959).	Chemical investigations of the giant nerve fibers of the squid: I. Fractionation of dialyzable constituents of axoplasm and quantitative determination of the free amino acids. Biochimica et Biophysica Acta, 32, 362–374. https://doi.org/10.1016/0006-3002(59)90608-0						x
128	Deffner, G. G. J., & Hafter, R. E. (1960).	Chemical investigations of the giant nerve fibers of the squid: IV. Acid-base balance in axoplasm. Biochimica et Biophysica Acta, 42, 200–205. https://doi.org/10.1016/0006-3002(60)90781-2						x
129	Delaunay, P. H. (1931).	L’excrétion Azotée Des Invertébrés. Biological Reviews, 6(3), 265–301. https://doi.org/10.1111/j.1469-185X.1931.tb01028.x						x			x
130	Devi, V. U., Rao, Y. P., & Rao, D. G. V. P. (1984).	Anaerobic response of a tropical intertidal gastropod Morula granulata (Duclos) to low salinities and fresh water. Journal of Experimental Marine Biology and Ecology, 84(2), 179–189. https://doi.org/10.1016/0022-0981(84)90211-9								x
131	Dice, J. F. (1969).	Osmoregulation and salinity tolerance in the polychaete annelid Cirriformia spirabrancha (Moore, 1904). Comparative Biochemistry and Physiology, 28(3), 1331–1343. https://doi.org/10.1016/0010-406X(69)90570-2								x		x
132	Dickinson, G. H., Ivanina, A. V., Matoo, O. B., Pörtner, H. O., Lannig, G., Bock, C., Beniash, E., & Sokolova, I. M. (2012).	Interactive effects of salinity and elevated CO2 levels on juvenile eastern oysters, Crassostrea virginica. Journal of Experimental Biology, 215(1), 29–43. https://doi.org/10.1242/jeb.061481																	no absolute concentrations
133	Diehl, W. J. (1986).	Osmoregulation in echinoderms. Comparative Biochemistry and Physiology Part A: Physiology, 84(2), 199–205. https://doi.org/10.1016/0300-9629(86)90605-5		x
134	Dietz, T. H., Wilcox, S. J., Byrne, R. A., & Silverman, H. (1997).	Effects of hyperosmotic challenge on the freshwater bivalve Dreissena polymorpha: Importance of K+. Canadian Journal of Zoology-Revue Canadienne De Zoologie, 75(5), 697–705. https://doi.org/10.1139/z97-090								x
135	Dietz, T., Lessard, D., Silverman, H., & Lynn, J. (1994).	Osmoregulation in Dreissena-Polymorpha—The Importance of Na, Cl, K, and Particularly Mg. Biological Bulletin, 187(1), 76–83. https://doi.org/10.2307/1542167				x
136	Dietz, Thomas H., & Alvarado, R. H. (1970).	Osmotic and ionic regulation in lumbricus terrestris l. The Biological Bulletin, 138(3), 247–261. https://doi.org/10.2307/1540210								x
137	Dietz, Thomas H., Wilcox, S. J., Byrne, R. A., Lynn, J. W., & Silverman, H. (1996).	Osmotic and ionic regulation of North American zebra mussels (Dreissena polymorpha). American Zoologist, 36(3), 364–372.				x
138	Dietz, T., Udoetok, A., Cherry, J., Silverman, H., & Byrne, R. (2000).	Kidney function and sulfate uptake and loss in the freshwater bivalve Toxolasma texasensis. The Biological Bulletin, 199(1), 14–20. https://doi.org/10.2307/1542702												x					Freshwater species
139	Dobkin, S., & Manning, R. B. (1964).	Osmoregulation in two species of Palaemonetes (Crustacea: Decapoda) from Florida. Bulletin of Marine Science, 14(1), 149–157.	x
140	Dohn, N., & Malte, H. (1998).	Volume regulation in red blood cells. In The Biology of Hagfishes (S. 300–306). Springer.	x							x
141	Dorgelo, J. (1979).	The influence of temperature on the blood osmoconcentration of an osmoconforming and an osmoregulating crab. Hydrobiological Bulletin, 13(1), 22–28. https://doi.org/10.1007/BF02260304								x
142	Dragolovich, J., & Pierce, S. K. (1994).	The role and regulation of methylamines in the response of cells to osmotic stress. Cellular and molecular physiology of cell volume regulation, 123–132.	x
143	Duchateau, G., Sarlet, H., & Florkin, M. (1952).	Sur les acides aminés, libres ou combinés sous forme non protéinique, du plasma sanguin de différents insectes (Phasme, larve d’abeille, lepidoptères). Archives Internationales de Physiologie, 60(1), 103–104.			x		x
144	Ducháteau, G., Sarlet, H., Camien, M. N., & Florkin, M. (1952).	Acides aminés non protéiniques des tissus chez les mollusques lamellibranches et chez les vers. Comparaison des formes marines et des formes dulcicoles. Archives Internationales de Physiologie, 60(1), 124–125.					x
145	Duchateau-Bosson, G. H., Jeuniaux, C., & Florkin, M. (1961).	Rôle de la variation de la composante amino-acide intracellulaire dans l’euryhalinité d’arenicola marina L. Archives Internationales de Physiologie et de Biochimie, 69(1).								x
146	duPaul, W. D., & Webb, K. L. (1970).	The effect of temperature of salinity-induced changes in the free amino acid pool of Mya arenaria. Comparative Biochemistry and Physiology, 32(4), 785–801. https://doi.org/10.1016/0010-406X(70)90829-7								x
147	Dupaul, W. D., & Webb, K. L. (1971).	Free Amino Acid Accumulation in Isolated Gill Tissue of← Mya Arenaria→. Archives internationales de physiologie et de biochimie, 79(2), 327–336.								x
148	Dupaul, W. D., & Webb, K. L. (1974).	Salinity-induced changes in the alanine and aspartic aminotransferase activity in three marine bivalve molluscs. Archives internationales de physiologie et de biochimie, 82(5), 817–822.								x
149	Duval, M. (1925).	Recherches physico-chimiques et physiologiques sur le milieu intérieur des animaux aquatiques. Modifications sous l’influence du milieu extérieur, par Marcel Duval. Ed. Blondel La Rougery.								x
150	Duvert, M., Gourdoux, L., & Moreau, R. (2000).	Cytochemical and physiological studies of the energetic metabolism and osmotrophy in Sagitta friderici (chaetognath). JMBA-Journal of the Marine Biological Association of the United Kingdom, 80(5), 885–890.	x
151	Eggleton, P., & Eggleton, G. P. (1928).	Further observations on phosphagen. The Journal of Physiology, 65(1), 15–24. https://doi.org/10.1113/jphysiol.1928.sp002457						x
152	Ellis, L. L., Burcham, J. M., Paynter, K. T., & Bishop, S. H. (1985).	Amino acid metabolism in euryhaline bivalves: Regulation of glycine accumulation in ribbed mussel gills. Journal of Experimental Zoology Part A: Ecological Genetics and Physiology, 233(3), 347–358.	x
153	Ennor, A. H., & Morrison, J. F. (1958).	Biochemistry of the phosphagens and related guanidines. Physiological reviews, 38(4), 631–674.		x
154	Ewer, D. W., & Ewer, R. F. (1943).	Osmotic Regulation in Sabella Pavonina. Nature, 152(3864), 598–599. https://doi.org/10.1038/152598a0	x
155	Fang, J., Zhang, J., Liu, Y., Jiang, Z., Mao, Y., & Fang, J. (2015).	Effects of temperature and salinity on mortality and metabolism of Ophiopholis mirabilis. Marine Biology Research, 11(2), 157–167. https://doi.org/10.1080/17451000.2014.904884								x
156	Ferguson, J.C. (1980).	Fluxes of dissolved amino acids between sea water and Echinaster. Comparative Biochemistry and Physiology -- Part A: Physiology, 65(3), 291–295. Scopus. https://doi.org/10.1016/0300-9629(80)90031-6	x
157	Ferguson, J.C. (1990).	Hyperosmotic properties of the fluids of the perivisceral coelom and water vascular system of starfish kept under stable conditions. Comparative Biochemistry and Physiology -- Part A: Physiology, 95(2), 245–248. Scopus. https://doi.org/10.1016/0300-9629(90)90205-7					x
158	Ferguson, John C. (1980).	The non-dependency of a starfish on epidermal uptake of dissolved organic matter. Comparative Biochemistry and Physiology Part A: Physiology, 66(3), 461–465. https://doi.org/10.1016/0300-9629(80)90192-9										x
159	Ferguson, John C. (1982).	A COMPARATIVE STUDY OF THE NET METABOLIC BENEFITS DERIVED FROM THE UPTAKE AND RELEASE OF FREE AMINO ACIDS BY MARINE INVERTEBRATES. The Biological Bulletin, 162(1), 1–17. https://doi.org/10.2307/1540965	x
160	Ferraris, J. D., Fauchald, K., & Kensley, B. (1994).	Physiological responses to fluctuation in temperature of salinity in invertebrates. Adaptations ofAlpheus viridari (Decapoda, Crustacea),Terebellides parva (Polychaeta) andGolfinigia cylindrata (Sipunculida) to the mangrove habitat. Marine Biology, 120(3), 397–406. https://doi.org/10.1007/BF00680213								x
161	Ferraris, Joan D., & Norenburg, J. L. (1988).	Water and solute regulation in Procephalothrix spiralis Coe and Clitellio arenarius (Müller) III. Long-term acclimation to diluted seawaters and effect of putative neuroendocrine structures. Hydrobiologia, 156(1), 161–173. https://doi.org/10.1007/BF00027990								x
162	Fiess, J. C., Hudson, H. A., Hom, J. R., Kato, C., & Yancey, P. H. (2002).	Phosphodiester amine, taurine and derivatives, and other osmolytes in vesicomyid bivalves: Correlations with depth and symbiont metabolism. Cahiers de biologie marine, 43(3–4), 337–340.					x	x
163	Fletcher, C. R. (1974a).	Volume regulation in Nereis diversicolor—I. the steady state. Comparative Biochemistry and Physiology Part A: Physiology, 47(4), 1199–1214. https://doi.org/10.1016/0300-9629(74)90094-2								x
164	Fletcher, C. R. (1974b).	Volume regulation in Nereis diversicolor—III. adaptation to a reduced salinity. Comparative Biochemistry and Physiology Part A: Physiology, 47(4), 1221–1234. https://doi.org/10.1016/0300-9629(74)90096-6								x
165	Florkin, M., & Schoffeniels, E. (1965).	Euryhalinity and the concept of physiological radiation. Studies in comparative biochemistry, 6–40.		x
166	Foglietta, L. M., & Herrera, F. C. (1996).	Ionosmotic response of respiratory trees of the holothurian Isostichopus badionotus Selenka preincubated in hyper-, iso-and hypo-osmotic sea water. Journal of Experimental Marine Biology and Ecology, 202(2), 151–164. Scopus. https://doi.org/10.1016/0022-0981(96)00021-4										x
167	Foster B. A., & Crisp Dennis John. (1970).	Responses and acclimation to salinity in the adults of some balanomorph barnacles. Philosophical Transactions of the Royal Society of London. B, Biological Sciences, 256(810), 377–400. https://doi.org/10.1098/rstb.1970.0001								x
168	Foster, R. C. (1974).	Comparative biochemical studies of osmo-regulation in sipuncula–I. Steady-state characteristics of two sipunculids in full-strength sea water. Comp. Biochem. Physiol., 1974, Vol. 47A, pp. 855 to 866										x
169	Fotedar, R., Harries, S., & Savage, S. (2008).	Survival, growth and osmolality of greenlip abalone Haliotis laevigata (Donovan 1808) when exposed to different ionic profiles of inland saline water. Aquaculture Research, 39(5), 441–448. https://doi.org/10.1111/j.1365-2109.2007.01721.x										x
170	Fraga, F., & Lopez-Capont, M. (1958).	Oligosaccharides and the protein factor of the mussel (Mytilus edulis). Invest. Pesquera, 11, 39–52.	x				x
171	Freas, W., & Grollman, S. (1980).	Ionic and osmotic influence on prostaglandin release from the gill tissue of a marine bivalve, Modiolus demissus. Journal of Experimental Biology, 84(1), 169–185.	x
172	Freel, R. W. (1978).	Patterns of Water and Solute Regulation in the Muscle Fibres of Osmoconforming Marine Decapod Crustaceans. Journal of Experimental Biology, 72(1), 107–126.								x		x
173	Freel, R. W. (1982).	Heterogeneity and dynamics of muscle fiber water in marine crustaceans. Journal of Comparative Physiology B: Biochemical, Systemic, and Environmental Physiology, 146(1), 113–121.								x
174	Freeman, R. F. H., & Rigler, F. H. (1957).	The responses of Scrobicularia plana (da Costa) to osmotic pressure changes. Journal of the Marine Biological Association of the United Kingdom, 36(3), 553–567. https://doi.org/10.1017/S0025315400025844								x
175	Freeman, R. F. H., & Shuttleworth, T. J. (1977a).	Distribution of dry matter between the tissues and coelom in Arenicola marina (L.) equilibrated to diluted sea water. Journal of the Marine Biological Association of the United Kingdom, 57(1), 97–107. https://doi.org/10.1017/S0025315400021263								x
176	Freeman, R., & Shuttleworth, T. (1977c).	Distribution of intracellular solutes in Arenicola marina (Polychaeta) equilibrated to diluted sea water. Journal of the Marine Biological Association of the United Kingdom, 57(4), 889–905.								x
177	Freeman, R., & Shuttleworth, T. (1977b).	Distribution of water in Arenicola marina (L.) equilibrated to diluted sea water. Journal of the Marine Biological Association of the United Kingdom, 57(2), 501–519.								x
178	Freeman, R., & Shuttleworth, T. (1985).	Distribution of intracellular sodium, potassium and chloride in Arenicola marina equilibrated to diluted sea water. Journal of the Marine Biological Association of the United Kingdom, 65(2), 395–413.								x
179	Freire, C. A., Souza-Bastos, L. R., Amado, E. M., Prodocimo, V., & Souza, M. M. (2013).	Regulation of Muscle Hydration Upon Hypo- or Hyper-Osmotic Shocks: Differences Related to Invasion of the Freshwater Habitat by Decapod Crustaceans. Journal of Experimental Zoology Part A-Ecological Genetics and Physiology, 319A(6), 297–309. https://doi.org/10.1002/jez.1793								x
180	Frontali, N. (1964).	Brain glutamic acid decarboxylase and synthesis of amino-butyric acid in vertebrate and invertebrate species. Comparative neurochemistry, 8p. https://w3.avignon.inra.fr/dspace/handle/2174/488					x				x
181	Fyhn, H. J. (1976).	A note on the hyperosmotic regulation in the brackish-water clamRangia cuneata. Journal of comparative physiology, 107(2), 159–167.				x
182	Gainey, Louis F. (1978a).	The Response of the Corbiculidae (Mollusca: Bivalvia) to Osmotic Stress: The Organismal Response. Physiological Zoology, 51(1), 68–78. https://doi.org/10.1086/physzool.51.1.30158666	x
183	Gainey, L. F. Jr. (1994).	Volume regulation in three species of marine mussels—ScienceDirect. http://www.sciencedirect.com/science/article/pii/0022098194901287	x
184	Galloway, T. M. (1933).	The osmotic pressure and saline content of the blood of Petromyzon fluviatilis. Journal of Experimental Biology, 10(4), 313–316.				x
185	Gangal, S. V., & Magar, N. G. (1964).	Free amino acids in crab muscle. Indian Journal of Biochemistry, 1, 59–60.						x
186	Garrett, M. A., & Bradley, T. J. (1987).	Extracellular accumulation of proline, serine and trehalose in the haemolymph of osmoconforming brackish-water mosquitoes. Journal of Experimental Biology, 129(1), 231–238.				x
187	Garrey, W. E. (1905).	The osmotic pressure of sea water and of the blood of marine animals: Including some observations on the permeability of animal membranes. The Biological Bulletin, 8(4), 257–270.	x
188	Generlich, O., & Giere, O. (1996).	Osmoregulation in two aquatic oligochaetes from habitats with different salinity and comparison to other annelids. Hydrobiologia, 334(1–3), 251–261. https://doi.org/10.1007/BF00017375				x
189	Geng, C., Tian, Y., Shang, Y., Wang, L., Jiang, Y., & Chang, Y. (2016).	Effect of acute salinity stress on ion homeostasis, Na+/K+ -ATPase and histological structure in sea cucumber Apostichopus japonicus. Springerplus, 5, 1977. https://doi.org/10.1186/s40064-016-3620-4								x		x
190	George, P., & Damodaran, R. (1999).	The intracellular fluid isosmotic regulation in yellow clam Sunetta scripta L.(Mollusca: Bivalvia) acclimated to different salnities.															x
191	Gilbert, D. S. (1975).	Axoplasm chemical composition in Myxicola and solubility properties of its structural proteins. The Journal of Physiology, 253(1), 303–319. https://doi.org/10.1113/jphysiol.1975.sp011191										x
192	Gilles, Raymond. (1972).	Osmoregulation in three molluscs: Acanthochitona discrepans (Brown), Glycymeris glycymeris (L.) and Mytilus edulis (L.). The Biological Bulletin, 142(1), 25–35. https://doi.org/10.2307/1540243								x					x		x
193	Gilles, R. (1987).	Volume Regulation in Cells of Euryhaline Invertebrates. In Current Topics in Membranes and Transport (Bd. 30, S. 205–247). Elsevier. https://doi.org/10.1016/S0070-2161(08)60372-X		x		x				x
194	Gilles, R. (1988).	Comparative aspects of cell osmoregulation and volume control. Kidney and Blood Pressure Research, 11(3–5), 277–288.	x				x
195	Gilles, R., & Péqueux, A. (1981).	Cell volume regulation in crustaceans: Relationship between mechanisms for controlling the osmolality of extracellular and intracellular fluids. Journal of Experimental Zoology Part A: Ecological Genetics and Physiology, 215(3), 351–362.				x
196	Gilles, R., & Delpire, E. (2010).	Variations in Salinity, Osmolarity, and Water Availability: Vertebrates and Invertebrates. In Comprehensive Physiology. John Wiley & Sons, Inc. https://doi.org/10.1002/cphy.cp130222		x
197	Gomme, J. (1982).	Epidermal nutrient absorption in marine invertebrates: A comparative analysis. American Zoologist, 22(3), 691–708.	x
198	Gomme, J. (1985).	The transport of exogenous organic substances by invertebrate integuments: Substrate compartmentalization, recycling, epidermal metabolism, and transepidermal transport. In Transport processes, Iono-and Osmoregulation (S. 350–363). Springer.	x
199	Gomme, Jørgen. (2001).	Transport of exogenous organic substances by invertebrate integuments: The field revisited. Journal of Experimental Zoology Part A: Ecological Genetics and Physiology, 289(4), 254–265.	x
200	Gordon, M. S. (1965).	Intracellular osmoregulation in skeletal muscle during salinity adaptation in two species of toads. The Biological Bulletin, 128(2), 218–229.								x
201	Gray, J. S. (1976).	The effects of salinity, temperature and mercury on mortality of the trocophore larvae of Serpula vermicularis L. (Annelida: Polychaeta). Journal of Experimental Marine Biology and Ecology, 23(2), 127–134. Scopus. https://doi.org/10.1016/0022-0981(76)90136-2	x
202	Green, J. P., & Dunn, D. F. (1976).	Chloride and osmotic balance in the euryhaline sipunculid Phascolosoma arcuatum from a Malaysian mangrove swamp. The Biological bulletin, 150(2), 211–221. Scopus. https://doi.org/10.2307/1540469						x
203	Greenwalt, Dale E., & Bishop, S. H. (1980).	Effect of Aminotransferase Inhibitors on the Pattern of Free Amino Acid Accumulation in Isolated Mussel Hearts Subjected to Hyperosmotic Stress. Physiological Zoology, 53(3), 262–269. https://doi.org/10.1086/physzool.53.3.30155789										x
204	Greenwalt, Dale Edward. (1981).	Role of amino acids in cell volume control in the ribbed mussel: Alanine and proline metabolism.										x
205	Griffith, M. B. (2017).	Toxicological Perspective on the Osmoregulation and Ionoregulation Physiology of Major Ions by Freshwater Animals: Teleost Fish, Crustacea, Aquatic Insects, and Mollusca. Environmental Toxicology and Chemistry, 36(3), 576–600. https://doi.org/10.1002/etc.3676	x	x
206	Griffiths, A. B. (1892).	On the blood of the Invertebrata. Proceedings of the Royal Society of Edinburgh, 18, 288–294.						x
207	Griffiths, A. B. (1893).	On the blood of the invertebrata. Proceedings of the Royal Society of Edinburgh, 19, 116–130.					x
208	Griffiths, D. E., Morrison, J. F., & Ennor, A. H. (1957).	The distribution of guanidines, phosphagens and N-amidino phosphokinases in echinoids. Biochemical Journal, 65(4), 612–617.						x
209	Gross, W. J. (1954).	Osmotic responses in the sipunculid Dendrostomum zostericolum. Journal of Experimental Biology, 31(3), 402–423.								x
210	Hamana, K., Hamana, H., & Shinozawa, T. (1995).	Alterations in polyamine levels of nematode, earthworm, leech and planarian during regeneration, temperature and osmotic stresses. Comparative Biochemistry and Physiology Part B: Biochemistry and Molecular Biology, 111(1), 91–97.					x
211	Hand, S. C. (1992).	Water content and metabolic organization in anhydrobiotic animals. In Water and Life (S. 104–127). Springer.	x	x		x
212	Hand, S., & Stickle, W. (1977).	Effects of tidal fluctuations of salinity on pericardial fluid composition of the American oyster Crassostrea virginica. Marine Biology, 42(3), 259–271.							x	x
213	Hanson, J. A., & Dietz, T. H. (1976).	The role of free amino acids in cellular osmoregulation in the freshwater bivalve Ligumia subrostrata (Say). Canadian Journal of Zoology, 54(11), 1927–1931. https://doi.org/10.1139/z76-223								x
214	Haurowitz, F. (1922).	Weitere Untersuchung der Gonaden von Rhizostoma Cuvieri. Hoppe-Seyler\’ s Zeitschrift für physiologische Chemie, 122(4–6), 145–159.	x
215	Hawkins, A., & Hilbish, T. (1992).	The Costs of Cell-Volume Regulation—Protein-Metabolism During Hyperosmotic Adjustment. Journal of the Marine Biological Association of the United Kingdom, 72(3), 569–578. https://doi.org/10.1017/S002531540005935X										x
216	Hayashi, Y. S. (1993).	Alanine aminotransferase from gill tissue of the brackish-water bivalve Corbicula japonica (Prime): Subcellular localization and some enzymatic properties. Journal of experimental marine biology and ecology, 170(1), 45–54.	x
217	Hayes, F. R., & Pelluet, D. (1947).	The Inorganic Constitution of Molluscan Blood and Muscle. Journal of the Marine Biological Association of the United Kingdom, 26(4), 580–589. https://doi.org/10.1017/S0025315400013771										x
218	Henry, R. P. (1995).	Nitrogen metabolism and excretion for cell volume regulation in invertebrates. Nitrogen metabolism and excretion. Walsh, PJ, Wright, P.(Editors) CRC Press: Boca Raton, FL. p, 63–73.		x
219	Henry, R. P., & Mangum, C. P. (1980b).	Salt and water balance in the oligohaline clam, Rangia cuneata III. Reduction of the free amino acid pool during low salinity adaptation. Journal of Experimental Zoology Part A: Ecological Genetics and Physiology, 211(1), 25–32.				x				x
220	Henry, R. P., & Mangum, C. P. (1980a).	Salt and water balance in the oligohaline clam, Rangia cuneata I. Anisosmotic extracellular regulation. Journal of Experimental Zoology, 211(1), 1–10. https://doi.org/10.1002/jez.1402110102				x				x
221	Henry, R. P., Mangum, C. P., & Webb, K. L. (1980).	Salt and water balance in the oligohaline clam, Rangia cuneata II. Accumulation of intracellular free amino acids during high salinity adaptation. Journal of Experimental Zoology, 211(1), 11–24. https://doi.org/10.1002/jez.1402110103				x				x
222	Henry, R., & Wheatly, M. (1992).	Interaction of Respiration, Ion Regulation, and Acid-Base-Balance in the Everyday Life of Aquatic Crustaceans. American Zoologist, 32(3), 407–416.	x			x
223	Henry, R., Mcbride, C., & Williams, A. (1993).	Responses of the Marsh Periwinkle, Littoraria (littorina) Irrorata to Temperature, Salinity and Desiccation, and the Potential Physiological Relationship to Climbing Behavior. Marine Behaviour and Physiology, 24(1), 45–54. https://doi.org/10.1080/10236249309378877										x
224	Henze, M. (1905).	Beiträge zur Muskelchemie der Octopoden. Hoppe-Seyler\’ s Zeitschrift für physiologische Chemie, 43(6), 477–493.						x
225	Herrera, F. C., López, I., Egea, R., & Zanders, I. P. (1989).	Short-term osmotic responses of cells and tissues of the sea anemone, Condylactis gigantea. Comparative Biochemistry and Physiology Part A: Physiology, 92(3), 377–384. https://doi.org/10.1016/0300-9629(89)90579-3								x		x
226	Herrera, F. C., & Plaza, M. (1981).	The role of extracellular sodium in isosmotic intracellular regulation in the respiratory tree of Holothuria glaberrima. Comparative Biochemistry and Physiology Part A: Physiology, 68(3), 373–382. https://doi.org/10.1016/0300-9629(81)90064-5						x		x	x
227	Hildebrandt, J. ‐P., & Zerbst‐Boroffka, I. (1992).	Osmotic and ionic regulation during hypoxia in the medicinal leech, Hirudo medicinalis L. Journal of Experimental Zoology, 263(4), 374–381. Scopus. https://doi.org/10.1002/jez.1402630405				x
228	Hillman, R. E. (1964).	Chromatographic evidence of intraspecific genetic differences in the eastern oyster, Crassostrea virginica. Systematic Zoology, 13(1), 12–18.	x
229	Hobson, G. E., & Rees, K. R. (1955).	The annelid phosphagens. Biochemical Journal, 61(4), 549.						x
230	Hoeger, U., & Abe, H. (2004).	Beta-alanine and other free amino acids during salinity adaptation of the polychaete Nereis japonica. Comparative Biochemistry and Physiology A-Molecular & Integrative Physiology, 137(1), 161–171. https://doi.org/10.1016/S1095-6433(03)00286-1							x
231	Hoeher, N., Regoli, F., Dissanayake, A., Nagel, M., Kriews, M., Koehler, A., & Broeg, K. (2013).	Immunomodulating effects of environmentally realistic copper concentrations in Mytilus edulis adapted to naturally low salinities. Aquatic Toxicology, 140, 185–195. https://doi.org/10.1016/j.aquatox.2013.06.001	x
232	Hoffmann, E. K., & Kolb, H.-A. (1991).	Mechanisms of activation of regulatory volume responses after cell swelling. In Advances in Comparative and Environmental Physiology (S. 140–185). Springer.		x					x
233	Holtfreter, J., Koszalka, T. R., & Miller, L. L. (1950).	Chromatographic studies of amino acids in the eggs and embryos of various species. Experimental Cell Research, 1(3), 453–459. https://doi.org/10.1016/0014-4827(50)90021-8	x					x
234	Hosoi, K. (1935).	The exchange of calcium ion and water between sea-anemones and the surrounding medium. Sci. Rep. Tohoku Univ., 10, 377–386.										x
235	Hoyaux, J., Gilles, R., & Jeuniaux, C. (1976).	Osmoregulation in molluscs of the intertidal zone. Comparative Biochemistry and Physiology Part A: Physiology, 53(4), 361–365.													x		x
236	Huggins, A. K., & Munday, K. A. (1968).	Crustacean metabolism. In Advances in comparative physiology and biochemistry (Bd. 3, S. 271–378). Elsevier.		x
237	Iwasa, K. (1983).	Osmotic properties of the squid giant axon and their modifications. Cellular and Molecular Neurobiology, 3(2), 151–161. Scopus. https://doi.org/10.1007/BF00735279	x
238	Jacobsen, J. G., & Smith, L. H. (1968).	Biochemistry and physiology of taurine and taurine derivatives. Physiological Reviews, 48(2), 424–511. https://doi.org/10.1152/physrev.1968.48.2.424		x
239	Jeuniaux, Ch, Duchateau-Bosson, G., & FLORKIN, M. (1961).	Variation de la Composante Amino-acide des Tissus et Euryhalinitéchez Perinereis cultrifera Gr. Et Nereis diversicolor (OF Müller). The Journal of Biochemistry, 49(6), 527–531.								x
240	Jeuniaux, Charles, Bricteux-Grégoire, S., & Florkin, M. (1962a).	Régulation osmotique intracellulaire chez Asterias Rubens L., rôle du glycocolle et de la taurine. Cahiers de Biologie Marine. https://orbi.uliege.be/handle/2268/197486								x
241	Jeuniaux, Charles, Bricteux-Grégoire, S., & Florkin, M. (1962b).	Rôle osmorégulateur intracellulaire du glycocolle et de la taurine chez l’étoile de mer Asterias rubens L. Archives Internationales de Physiologie et de Biochimie, 70(1). https://orbi.uliege.be/handle/2268/198152								x
242	Jeuniaux, Charles. (1988).	Adaptations, ecophysiologiques de certains crustacés, mollusques et polychètes aux variations de salinité du milieu intertidal: Ecophysiologie.		x
243	Ji, C., Wang, Q., Wu, H., Tan, Q., & Wang, W.-X. (2016).	A metabolomic study on the biological effects of metal pollutions in oysters Crassostrea sikamea. Marine Pollution Bulletin, 102(1), 216–222. https://doi.org/10.1016/j.marpolbul.2015.11.037	x								x
244	Johannes, R. E., Coward, S. J., & Webb, K. L. (1969).	Are dissolved amino acids an energy source for marine invertebrates? Comparative Biochemistry and Physiology, 29(1), 283–288. https://doi.org/10.1016/0010-406X(69)91746-0													x		x
245	Jones, R. W., & Gorham, J. (1980).	COMPARATIVE ROLE OF ORGANIC COMPOUNDS IN OSMOREGULATION IN PLANTS AND ANIMALS. In Animals and Environmental Fitness: Physiological and Biochemical Aspects of Adaptation and Ecology, Volume 2 (S. 9–10). Elsevier.	x
246	Jordan, P. J., & Deaton, L. E. (1999).	Osmotic regulation and salinity tolerance in the freshwater snail Pomacea bridgesi and the freshwater clam Lampsilis teres. Comparative Biochemistry and Physiology A-Molecular and Integrative Physiology, 122(2), 199–205. https://doi.org/10.1016/S1095-6433(98)10167-8								x
247	Jørgensen, N. (1979).	Uptake of L-valine and other amino acids by the polychaete Nereis virens. Marine Biology, 52(1), 45–52.					x				x
248	Jørgensen, N. O. G., & Kristensen, E. (1980a).	Uptake of amino acids by three species of Nereis (Annelida: Polychaeta). I. Transport kinetics and net uptake from natural concentrations. Marine Ecology Progress Series, 329–340.									x
249	Joyner, J. L., Peyer, S. M., & Lee, R. W. (2003).	Possible roles of sulfur-containing amino acids in a chemoautotrophic bacterium-mollusc symbiosis. The Biological Bulletin, 205(3), 331–338.					x
250	Kamemoto, F. I., & Larson, E. J. (1964).	Chloride concentrations in the coelomic and nephridial fluids of the sipunculid Dendrostomum signifer. Comparative Biochemistry and Physiology, 13(4), 477–480. https://doi.org/10.1016/0010-406X(64)90041-6										x
251	Kamemoto, F.I., Kato, K. N., & Tucker, L. E. (1966).	Neurosecretion and salt and water balance in the annelida and crustacea. Integrative and Comparative Biology, 6(2), 213–219. Scopus. https://doi.org/10.1093/icb/6.2.213				x				x
252	Kamemoto, Fred I., & Tullis, R. E. (1972).	Hydromineral regulation in decapod crustacea. General and Comparative Endocrinology, 3, 299–307. https://doi.org/10.1016/0016-6480(72)90159-1									x
253	Kasschau, M. R. (1975).	The relationship of free amino acids to salinity changes and temperature-salinity interactions in the mud-flat snail, Nassarius obsoletus. Comparative Biochemistry and Physiology Part A: Physiology, 51(2), 301–308.								x
254	Kasschau, M. R., & Howard, C. L. (1984).	Free amino acid pool of a sea anemone: Exposure and recovery after an oil spill. Bulletin of environmental contamination and toxicology, 33(1), 56–62.										x							in situ; little change in salinity
255	Kasschau, M. R., Ragland, J. B., Pinkerton, S. O., & Chit, E. C. M. (1984).	Time related changes in the free amino acid pool of the sea anemone, Bunodosoma cavernata, during salinity stress. Comparative Biochemistry and Physiology Part A: Physiology, 79(1), 155–159. https://doi.org/10.1016/0300-9629(84)90724-2										x
256	Kasschau, M. R., Skisak, C. M., Cook, J. P., & Mills, W. R. (1984).	β-Alanine metabolism and high salinity stress in the sea anemone,Bunodosoma cavernata. Journal of Comparative Physiology B, 154(2), 181–186. https://doi.org/10.1007/BF00684143										x
257	Kavanau, J. L. (1953).	Metabolism of free amino acids, peptides and proteins in early sea urchin development. Journal of Experimental Zoology, 122(2), 285–337. https://doi.org/10.1002/jez.1401220205								x
258	Kazunori, H., & Naokuni, T. (1986).	Responses of giant neurons to osmotic stress in the giant African snail, Achatina fulica. Comparative Biochemistry and Physiology -- Part A: Physiology, 84(2), 289–294. Scopus. https://doi.org/10.1016/0300-9629(86)90616-X	x
259	Kelly, R. H., & Yancey, P. H. (1999).	High contents of trimethylamine oxide correlating with depth in deep-sea teleost fishes, skates, and decapod crustaceans. The Biological Bulletin, 196(1), 18–25.						x
260	Kermack, W. O., Lees, H., & Wood, J. D. (1955).	Some non-protein constituents of the tissues of the lobster. Biochemical Journal, 60(3), 424–428.						x
261	Khlebovich, V. V. (1968).	Some peculiar features of the hydrochemical regime and the fauna of mesohaline waters. Marine Biology, 2(1), 47–49. https://doi.org/10.1007/BF00351637	x
262	Khlebovich, V. V. (1969).	Aspects of animal evolution related to critical salinity and internal state. Marine Biology, 2(4), 338–345. https://doi.org/10.1007/BF00355713	x
263	Khlebovich, V. V., & Kondratenkov, A. P. (1973).	Stepwise acclimation—A method for estimating the potential euryhalinity of the gastropod Hydrobia ulvae. Marine Biology, 18(1), 6–8.	x
264	Kinne, O. (1984).	Marine ecology. United States.		x
265	Kinne, R. K. H. (1993).	The role of organic osmolytes in osmoregulation: From bacteria to mammals. Journal of Experimental Zoology, 265(4), 346–355. https://doi.org/10.1002/jez.1402650403	x
266	Kittredge, J. S., Simonsen, D. G., Roberts, E., & Jelinek, B. (1962).	Free amino acids of marine invertebrates. Amino acid pools, 176–186.	x
267	Kluytmans, J. H., Zandee, D. I., Zurburg, W., & Pieters, H. (1980).	The influence of seasonal changes on energy metabolism in Mytilus edulise (L.).—III. Anaerobic energy metabolism. Comparative Biochemistry and Physiology Part B: Comparative Biochemistry, 67(2), 307–315. https://doi.org/10.1016/0305-0491(80)90149-2										x
268	Koechlin, B. A. (1954).	The isolation and identification of the major anion fraction of the axoplasm of squid giant nerve fibers. Proceedings of the National Academy of Sciences of the United States of America, 40(2), 60.					x	x
269	Koechlin, B. A. (1955).	On the chemical composition of the axoplasm of squid giant nerve fibers with particular reference to its ion pattern. The Journal of Cell Biology, 1(6), 511–529.						x
270	Koechlin, N. (1977).	Micropuncture study of the sodium and potassium content in the nephridial and coelomic fluids in a marine Invertebrate Sabella pavonina Savigny (Polychaeta Annelida). Comparative Biochemistry and Physiology Part A: Physiology, 57(3), 353–357.					x			x
271	Koehn, R. K., Bayne, B. L., Moore, M. N., & Siebenaller, J. F. (1980).	Salinity related physiological and genetic differences between populations of Mytilus edulis. Biological Journal of the Linnean Society, 14(3–4), 319–334.									x
272	Koizumi, T. (1932).	Studies on the exchange and equilibrium of water and electrolytes in a holothurian Caudina chilensis (J. Müller). I. Permeability of the animal surface to water and ions in the sea water together with osmotic and ionic equilibrium between the body fluid of the animal and its surrounding sea water involving some corrections to our previous paper (1926). Sci. Rep. Tohoku Univ. Ser. 4, 7, 259–311.								x
273	Koizumi, T. (1935).	On the inorganic composition of the corpuscules of the body fluid. Sci. Rep. Tohoku Univ., 4(10), 277–280.						x
274	Koizumi, T. (1935).	Studies on the exchange and the equilibrium of water and electrolytes in a holothurian, Caudina chilensis (J. Müller). V. On the inorganic composition of the longitudinal muscles and the body wall without longitudinal muscles. Sci. Rep. Tohoku Univ. Ser, 4(10), 281–286.										x
275	Konosu, S. (1961).	Muscle extracts of aquatic animals-IV. Distribution of nitrogenous constituents in the muscle extract of a abalone Haliotis gigantea Reeve. Bull. Jap. Soc. Sci. Fish., 27, 251–254.						x				x
276	Kossel, A., & Edlbacher, S. (1905).	Beiträge zur chemischen Kenntnis der Echinodermen. Hoppe-Seyler´s Zeitschrift für physiologische Chemie, 94(4), 264–283. https://doi.org/10.1515/bchm2.1915.94.4.264						x
277	Koyama, H., Okamoto, S., Watanabe, N., Hoshino, N., Jimbo, M., Yasumoto, K., & Watabe, S. (2015).	Dynamic changes in the accumulation of metabolites in brackish water clam Corbicula japonica associated with alternation of salinity. Comparative Biochemistry and Physiology B-Biochemistry & Molecular Biology, 181, 59–70. https://doi.org/10.1016/j.cbpb.2014.11.007	x
278	Kravitz, E. A., Kuffler, S. W., & Potter, D. D. (1963).	Gamma-aminobutyric acid and other blocking compounds in crustacea: III. Their relative concentrations in separated motor and inhibitory axons. Journal of Neurophysiology, 26(5), 739–751.						x
279	Kravitz, E. A., Kuffler, S. W., Potter, D. D., & van Gelder, N. M. (1963).	Gamma-aminobutyric acid and other blocking compounds in crustacea: Ii. peripheral nervous system. Journal of Neurophysiology, 26(5), 729–738. https://doi.org/10.1152/jn.1963.26.5.729						x
280	Kravitz, E. A., Potter, D. D., & Van Gelder, N. M. (1962).	Gamma-aminobutyric acid and other blocking substances extracted from crab muscle. Nature, 194(4826), 382.	x
281	Krogh, A., Krogh, A., & Wernstedt, C. (1938).	The salt concentration in the tissues of some marine animals 1. Skandinavisches Archiv Für Physiologie, 80(3), 214–222.										x
282	Krontiris-Litowitz, J. K., Walters, E. T., & McAdoo, D. J. (1994).	Stress-elicited changes in amino acid levels of hemolymph of Aplysia californica. Journal of Comparative Physiology B, 163(8), 671–675. https://doi.org/10.1007/BF00369518					x
283	Krüger, F. (1971).	Morphology and life of the lugworm Arenicola marina. Helgoländer Wissenschaftliche Meeresuntersuchungen, 22(2), 149–200. Scopus. https://doi.org/10.1007/BF01609460	x
284	Kumano, M. (1929).	Chemical analysis on the pericardial fluid and the blood of Ostrea circumpicta Pils. Science Reports of the Tohoku Imperial University, series, 4, 281–284.																	unit not given
285	Kube, Sandra, Gerber, A., Jansen, J. M., & Schiedek, D. (2006).	Patterns of organic osmolytes in two marine bivalves, Macoma balthica, and Mytilus spp., along their European distribution. Marine Biology, 149(6), 1387–1396. https://doi.org/10.1007/s00227-006-0303-7																	data could not be transferred due to overlay of data points
286	Kurtz, A. C., & Luck, J. M. (1935).	Studies on annelid muscle I. Taurine in Audouinia spirabranchus, Moore. Journal of Biological Chemistry, 111(3), 577–584.						x
287	Lange, R. (1963).	The osmotic function of amino acids and taurine in the mussel, Mytilus edulis. Comparative Biochemistry and Physiology, 10(2), 173–179. https://doi.org/10.1016/0010-406X(63)90239-1													x
288	Lange, R. (1964).	The osmotic adjustment in the echinoderm, Strongylocentrotus droebachiensis. Comparative Biochemistry and Physiology, 13(3), 205–216. https://doi.org/10.1016/0010-406X(64)90117-3								x
289	Lange, Rolf, & Mostad, A. (1967).	Cell volume regulation in osmotically adjusting marine animals. Journal of Experimental Marine Biology and Ecology, 1(2), 209–219. https://doi.org/10.1016/0022-0981(67)90015-9	x
290	Lange, Rolf. (1970).	Isosmotic intracellular regulation and euryhalinity in marine bivalves. Journal of Experimental Marine Biology and Ecology, 5(2), 170–179.													x		x
291	Łapucki, T., & Normant, M. (2008).	Physiological responses to salinity changes of the isopod Idotea chelipes from the Baltic brackish waters. Comparative Biochemistry and Physiology Part A: Molecular & Integrative Physiology, 149(3), 299–305. https://doi.org/10.1016/j.cbpa.2008.01.009								x
292	Larsen, E. H., Deaton, L. E., Onken, H., O’Donnell, M., Grosell, M., Dantzler, W. H., & Weihrauch, D. (2014).	Osmoregulation and excretion. Comprehensive Physiology, 4(2), 405–573. https://doi.org/10.1002/cphy.c130004		x
293	Lee, D., & Atkinson, H. (1976).	Osmotic and Ionic Regulation: Excretion. In Physiology of Nematodes (S. 97–115). Springer.		x
294	Lee, J. A., Marsden, I. D., & Glover, C. N. (2010).	The influence of salinity on copper accumulation and its toxic effects in estuarine animals with differing osmoregulatory strategies. Aquatic Toxicology, 99(1), 65–72. https://doi.org/10.1016/j.aquatox.2010.04.006								x
295	Lee, R., Childress, J., & Desaulniers, N. (1997).	The effects of exposure to ammonia on ammonia and taurine pools of the symbiotic clam. Journal of Experimental Biology, 200(21), 2797–2805.					x	x
296	Lewis, P. R. (1952).	The free amino-acids of invertebrate nerve. Biochemical Journal, 52(2), 330–338.					x				x
297	Liebeke, M., & Bundy, J. G. (2013).	Biochemical diversity of betaines in earthworms. Biochemical and Biophysical Research Communications, 430(4), 1306–1311. https://doi.org/10.1016/j.bbrc.2012.12.049	x
298	Lin, H.-C., Su, Y.-C., & Su, S.-H. (2002).	A comparative study of osmoregulation in four fiddler crabs (Ocypodidae: Uca). Zoological Science, 19(6), 643–650. Scopus. https://doi.org/10.2108/zsj.19.643				x
299	Little, C., & Andrews, E. B. (1977).	Some aspects of excretion and osmoregulation in assimineid snails. Journal of Molluscan Studies, 43(3), 263–285. Scopus. https://doi.org/10.1093/oxfordjournals.mollus.a065381								x
300	Little, Colin. (1967).	Ionic Regulation in the Queen Conch, Strombus Gigas (Gastropoda, Prosobranchia). Journal of Experimental Biology, 46(3), 459–474.									x
301	Little, Colin. (1969).	A note on salinity tolerance in Siboglinum ekmani (Pogonophora). Sarsia, 38(1), 87–90.								x
302	Little, Colin. (1984).	Ecophysiology of Nais elinguis (Oligochaeta) in a brackish-water lagoon. Estuarine, Coastal and Shelf Science, 18(2), 231–244. https://doi.org/10.1016/0272-7714(84)90109-4								x
303	Liu, X.-J., Peng, Y.-H., & Huang, G.-Q. (2016).	Composition and nutritional evaluation of amino acids of peanut-worm Sipunculus nudus dry body from five sea areas of Beihai, Guangxi. Chinese Journal of Ecology, 35(3), 741–746. Scopus. https://doi.org/10.13292/j.1000-4890.201603.001						x
304	Löffler, H. (1959).	Beitrage zur Kenntnis Der Iranischen Binnengewässer I Der Niriz-See und Sein Einzugsgebiet. Internationale Revue der gesamten Hydrobiologie und Hydrographie, 44(1–4), 227–276.	x
305	Low, W. P., Ong, W. T., & Ip, Y. K. (1996).	Different physiological functions of free D- and L-alanine in three body parts of the intertidal sipunculid Phascolosoma arcuatum. Journal of Comparative Physiology B, 165(7), 558–564. https://doi.org/10.1007/BF00387517								x
306	Machin, J. (1975).	Osmotic responses of the bloodworm Glycera dibranchiata Ehlers: a graphical approach to the analysis of weight regulation. Comparative Biochemistry and Physiology Part A: Physiology, 52(1), 49-54.								x
307	Machin, J., & O’Donnell, M. J. (1977).	Volume regulation in the coelomocytes of the blood wormGlycera dibranchiata. Journal of Comparative Physiology, 117(3), 303–311. https://doi.org/10.1007/BF00691556	x							x
308	Mackay, W. C., & Prosser, C. L. (1970).	Ionic and osmotic regulation in the king crab and two other North Pacific crustaceans. Comparative Biochemistry and Physiology, 34(2), 273–280. https://doi.org/10.1016/0010-406X(70)90166-0										x
309	MAKISUMI, S. (1961).	Guanidino compounds from a sea-anemone, Anthopleura japonica Verrill. The Journal of Biochemistry, 49(4), 284–291.	x
310	Male, K. B., & Storey, K. B. (1983).	Kinetic characterization of NADP-specific glutamate dehydrogenase from the sea anemone, Anthopleura xanthogrammica: Control of amino acid biosynthesis during osmotic stress. Comparative Biochemistry and Physiology Part B: Comparative Biochemistry, 76(4), 823–829.												x
311	Manahan, DONAL T, Wright, S. H., & Stephens, G. C. (1983).	Simultaneous determination of net uptake of 16 amino acids by a marine bivalve. American Journal of Physiology-Regulatory, Integrative and Comparative Physiology, 244(6), R832–R838.	x				x
312	Manahan, Donal T. (1983).	The uptake and metabolism of dissolved amino acids by bivalve larvae. The Biological Bulletin, 164(2), 236–250.	x
313	Manery, J. F. (1939).	Electrolytes in squid blood and muscle. Journal of Cellular and Comparative Physiology, 14(3), 365–369. https://doi.org/10.1002/jcp.1030140312					x
314	Mangum, C. P. (1986).	Osmoregulation in marine and estuarine animals: Its influence on respiratory gas exchange and transport. Bollettino di zoologia, 53(1), 1–7. https://doi.org/10.1080/11250008609355474	x
315	Mantel, L. H., & Farmer, L. L. (1983).	Osmotic and ionic regulation. Internal anatomy and physiological regulation, 5, 53–161.		x		x
316	Marigomez, J., Soto, M., & Angulo, E. (1991).	Responses of Winkles Digestive Cells and Their Lysosomal System to Environmental Salinity Changes. Cellular and Molecular Biology, 37(1), 29–39.	x
317	Marino, A., Morabito, R., Spada, G. L., Adragna, N. C., & Lauf, P. K. (2010).	Mechanisms of Hyposmotic Volume Regulation in Isolated Nematocytes of the Anthozoan Aiptasia diaphana. Cellular Physiology and Biochemistry, 26(2), 209–218. https://doi.org/10.1159/000320529	x							x
318	Martin, A. W., Harrison, F. M., Huston, M. J., & Stewart, D. M. (1958).	The Blood Volumes of Some Representative Molluscs. Journal of Experimental Biology, 35(2), 260–279.						x
319	Martin, Arthur W. (1974).	Circulation in invertebrates. Annual review of physiology, 36(1), 171–186.		x
320	Matsushima, O., & Hayashi, Y. S. (1992).	Metabolism of d- and l-alanine and regulation of intracellular free amino acid levels during salinity stress in a brackish-water bivalve Corbicula japonica. Comparative Biochemistry and Physiology Part A: Physiology, 102(3), 465–471. https://doi.org/10.1016/0300-9629(92)90195-V								x
321	Matsushima, O., Khan, H., & Saleuddin, A. (1991).	Hemolymph Protein as a Source for Free Amino-Acid Accumulation in the Pulmonate Helisoma-Trivolvis During Hypertonic Stress. Journal of Experimental Zoology, 257(2), 141–149. https://doi.org/10.1002/jez.1402570202								x
322	Matsushima, Osamu, & Yamada, A. (1992).	Uptake of L-and D-alanine by a brackish-water Bivalve, Corbicula japonica, with special reference to their transport pathways and the salinity effect. Journal of Experimental Zoology Part A: Ecological Genetics and Physiology, 263(1), 8–17.								x
323	Matsushima, Osamu, Katayama, H., & Yamada, K. (1987).	The capacity for intracellular osmoregulation mediated by free amino acids in three bivalve molluscs. Journal of experimental marine biology and ecology, 109(1), 93–99.								x
324	Matsushima, Osamu, Khan, H. R., & Saleudin, A. S. M. (1989).	Changes in free amino acid concentrations in tissues of the freshwater pulmonate, Helisoma duryi, during hypertonic stress. Comparative Biochemistry and Physiology Part A: Physiology, 94(4), 653–657. https://doi.org/10.1016/0300-9629(89)90611-7								x
325	McAllen, R. J., Taylor, A. C., & Davenport, J. (1998).	Osmotic and body density response in the harpacticoid copepod Tigriopus brevicornis in supralittoral rock pools. Journal of the Marine Biological Association of the United Kingdom, 78(4), 1143–1153. https://doi.org/10.1017/S0025315400044386								x
326	McCance, R. A., & Masters, M. (1937).	The chemical composition and the acid base balance of Archidoris britannica. Journal of the Marine Biological Association of the United Kingdom, 22(1), 273–280.										x
327	McCance, R. A., & Shackleton, L. R. B. (1937).	The metallic constituents of marine gastropods. Journal of the Marine Biological Association of the United Kingdom, 22(1), 269–271.										x
328	McCoy, E. (2012).	Aspects of taurine chemistry in different cell types. Di dalam: El Idrissi.	x
329	McLaughlin, J. (1971).	Biochemical studies on Eisenia foetida (Savigny, 1826), the brandling worm—III. Blood composition. Comparative Biochemistry and Physiology Part B: Comparative Biochemistry, 38(1), 179–195. https://doi.org/10.1016/0305-0491(71)90296-3				x
330	McNamara, J. C., & Faria, S. C. (2012).	Evolution of osmoregulatory patterns and gill ion transport mechanisms in the decapod Crustacea: A review. Journal of Comparative Physiology B, 182(8), 997–1014. https://doi.org/10.1007/s00360-012-0665-8	x	x
331	Mendel, L. B. (1904).	Über das Vorkommen von Taurin in den Muskeln von Weichtieren. Beitr. Zeitschr. Chem. Physiol. Path, 5, 582.	x					x
332	Mendel, L. B., & Bradley, H. C. (1906).	Experimental studies on the physiology of the molluscs—Third paper. American Journal of Physiology-Legacy Content, 17(2), 167–176.	x
333	Morizawa, K. (1927).	The extractive substances in Octopus octopodia. Acta Sch. Med. Univ. Imp. Kyoto, 9, 285–298.	x
334	Morris, R. (1965).	Studies on salt and water balance in Myxine glutinosa (L.). Journal of Experimental Biology, 42(2), 359–371.										x
335	Morrison, J. F., Griffiths, D. E., & Ennor, A. H. (1956).	Biochemical Evolution: Position of the Tunicates. Nature, 178(4529), 359. https://doi.org/10.1038/178359a0	x
336	Morritt, D., Leung, K. M. Y., Pirro, M. D., Yau, C., Wai, T.-C., & Williams, G. A. (2007).	Responses of the limpet, Cellana grata (Gould 1859), to hypo-osmotic stress during simulated tropical, monsoon rains. Journal of Experimental Marine Biology and Ecology, 352(1), 78–88. https://doi.org/10.1016/j.jembe.2007.07.002								x
337	Mowles, S. L. (2009).	Physiological and whole-body correlates of contest behaviour in the hermit crab Pagurus bernhardus.					x
338	Moyes, C. D., & Moon, T. W. (1987).	Solute effects on the glycine cleavage system of two osmoconformers (Raja erinacea and Mya arenaria) and an osmoregulator (Pseudopleuronectes americanus). Journal of Experimental Zoology, 242(1), 1–8. https://doi.org/10.1002/jez.1402420102	x
339	Murphy, W. A., & Dietz, T. H. (1976).	The effects of salt depletion on blood and tissue ion concentrations in the freshwater mussel, Ligumia subrostrata (Say). Journal of Comparative Physiology B: Biochemical, Systemic, and Environmental Physiology, 108(3), 233–242.										x
340	Myers, R. G. (1920).	A chemical study of the blood of several invertebrate animals. J. biol. Chem, 41, 119–135.					x				x
341	Natochin, I. V. (1966).	[Response of mussels to a separate change of the osmotic concentration and salinity of the environment]. Zhurnal Obshchei Biologii, 27(4), 473–479.																	not available
342	Natochin, I. V., & Berger, V. I. (1979).	[Ionic composition of mollusk cells—Evolutionary and ecologic aspects]. Zhurnal Evoliutsionnoi Biokhimii I Fiziologii, 15(3), 295–302.		x
343	Needham D. M. M., Needham J., Baldwin E., Yudkin J., & Hopkins F. G. (1932).	A comparative study of the phosphagens, with some remarks on the origin of vertebrates. Proceedings of the Royal Society of London. Series B, Containing Papers of a Biological Character, 110(767), 260–294. https://doi.org/10.1098/rspb.1932.0025						x
344	Newell, R. C. (2013).	Adaptation to environment: Essays on the physiology of marine animals. Elsevier.		x
345	Nieczaj, R., & Zerbst-Boroffka, I. (1993).	Hyperosmotic acclimation in the leech, Hirudo medicinalis L.: Energy metabolism, osmotic, ionic and volume regulation. Comparative Biochemistry and Physiology Part A: Physiology, 106(4), 595–602. https://doi.org/10.1016/0300-9629(93)90366-C	x			x
346	Oglesby, L. C. (1973).	Salt and water balance in lugworms (Polychaeta: Arenicolidae), with particular reference to Abarenicola pacifica in Coos Bay, Oregon. The Biological Bulletin, 145(1), 180–199.								x
347	Oglesby, L. C. (1978).	Salt and water balance. In “Physiology of Annelids” Ed by PJ Mill. Academic Press, London.		x
348	Oglesby, L. C. (1965).	Water and chloride fluxes in estuarine nereid polychaetes. Comparative Biochemistry and Physiology, 16(4), 437–455. https://doi.org/10.1016/0010-406X(65)90308-7				x				x			x
349	Oglesby, L. C., Mangum, C. P., Heacox, A. E., & Ready, N. E. (1982).	Salt and water balance in the polychaete Nereis virens. Comparative Biochemistry and Physiology Part A: Physiology, 73(1), 15–19. https://doi.org/10.1016/0300-9629(82)90085-8								x
350	Oglesby, L. C. (1965).	Steady-state parameters of water and chloride regulation in estuarine nereid polychaetes. Comparative Biochemistry and Physiology, 14(4), 621–640. https://doi.org/10.1016/0010-406X(65)90250-1								x
351	Oglesby, L. C. (1970).	Studies on the salt and water balance of Nereis diversicolor—I. Steady-state parameters. Comparative Biochemistry and Physiology, 36(3), 449–466. https://doi.org/10.1016/0010-406X(70)91022-4								x
352	Oglesby, L. C. (1981).	Volume regulation in aquatic invertebrates. Journal of Experimental Zoology, 215(3), 289–301. https://doi.org/10.1002/jez.1402150307		x
353	Oglesby, L. C. (1982).	Salt and water balance in the sipunculan phascolopsis gouldi: Is any animal a “simple osmometer”? Comparative Biochemistry and Physiology Part A: Physiology, 71(3), 363–368. https://doi.org/10.1016/0300-9629(82)90419-4								x
354	Okuda, Y. (1920).	Extractive matters of Palinurus japonicus and Loligo breekeri. Chem. Abstr, 14, 2827.						x
355	Okuda, Y., & Sanada, K. (1919).	A method for the determination of taurine in muscles. Journal of the College of Agriculture, 7(1), 77–80.						x
356	Okuma, E., & Abe, H. (1994).	Total D-amino and other free amino acids increase in the muscle of crayfish during seawater acclimation. Comparative Biochemistry and Physiology -- Part A: Physiology, 109(1), 191–197. Scopus. https://doi.org/10.1016/0300-9629(94)90326-3								x
357	Okuma, E., Watanabe, K., & Abe, H. (1998).	Distribution of Free D-Amino Acids in Bivalve Mollusks and the Effects of Physiological Conditions on the Levels of D- and L-Alanine in the Tissues of the Hard Clam, Meretrix lusoria. Fisheries Science, 64(4), 606–611. https://doi.org/10.2331/fishsci.64.606										x
358	Orange, C. J., & Freeman, R. F. H. (1988).	Intracellular sodium, potassium and chloride in the marine pulmonate, Amphibola crenata. Marine Behaviour and Physiology, 13(2), 125–153. https://doi.org/10.1080/10236248809378669								x
359	Otto, J., & Pierce, S. K. (1981a).	An interaction of extra-and intracellular osmoregulatory mechanisms in the bivalve mollusc Rangia cuneata. Marine Biology, 61(2–3), 193–198.				x				x
360	Otto, J., & Pierce, S. K. (1981b).	Water balance systems of Rangia cuneata: Ionic and amino acid regulation in changing salinities. Marine Biology, 61(2–3), 185–192. https://doi.org/10.1007/BF00386658				x
361	Ouchi, S. (1959).	2-Aminoethanesulfinic Acid. The Journal of Biochemistry, 46(6), 765–769.	x
362	Ozoh, P. T. E. (1990).	Volume regulation and accumulation of copper in whole and decapitated Hediste (Nereis) diversicolor under varying salinity—Copper regimes. Water, Air, and Soil Pollution, 49(3), 215–230. https://doi.org/10.1007/BF00507065	x
363	Padmanabhanaidu, B., & Ramamurthy, R. (1961).	The Influence of Sex and Size on the Osmotic Pressure, the Chloride and the Free Amino Acids of the Blood of the Freshwater Field Crab, Paratelphusa Sp. And the Freshwater Mussel, Lamellidens Marginalis. Journal of Experimental Biology, 38(1), 35–41.					x	x
364	Pagett, R. M. (1980).	Distribution of Sodium, Potassium and Chloride in the Ophiuroid, Ophiocomina Nigra (Abildgaard). Journal of the Marine Biological Association of the United Kingdom, 60(1), 163–170. https://doi.org/10.1017/S0025315400024218									x	x
365	Pantin, C. F. A. (1931).	The Adaptation of Gunda Ulvae to Salinity: III. The Electrolyte Exchange. Journal of Experimental Biology, 8(1), 82–94.								x
366	Parker, B., & Cole, W. H. (1940).	Studies of the body fluids and sera of some marine invertebrates. The Laboratory.																	not available
367	Pearse, A. S. (1928).	On the ability of certain marine invertebrates to live in diluted sea water. The Biological Bulletin, 54(5), 405–409.	x
368	Peña-Rasgado, C., Pierce, S., & Rasgado-Flores, H. (2001).	Osmolytes responsible for volume reduction under isosmotic or hypoosmotic conditions in barnacle muscle cells. CELLULAR AND MOLECULAR BIOLOGY-PARIS-WEGMANN-, 47(5), 841–854.								x
369	Peng, K. W., Chew, S. F., & Ip, Y. K. (1994).	Free amino acids and cell volume regulation in the sipunculid Phascolosoma arcuatum. Physiological zoology, 67(3), 580–597.								x
370	Pequeux, A. (1994).	Ecophysiology of Salt Acclimatization in Crustaceans—A Mini Review. Belgian Journal of Zoology, 124(1), 49–60.		x		x
371	Pequeux, AJR, & Gilles, R. (1984).	Control of the extracellular fluid osmolality in crustaceans. In Osmoregulation in estuarine and marine animals (S. 17–34). Springer.				x
372	Perrino, L. A., & Pierce, S. K. (2000).	Betaine aldehyde dehydrogenase kinetics partially account for oyster population differences in glycine betaine synthesis. Journal of Experimental Zoology, 286(3), 238–249. https://doi.org/10.1002/(SICI)1097-010X(20000215)286:3<238::AID-JEZ3>3.0.CO;2-E															x
373	Petersen, S., Arlt, G., Faubel, A., & Carman, K. R. (1998).	On the Nutritive Significance of Dissolved Free Amino Acid Uptake for the Cosmopolitan OligochaeteNais elinguisMüller (Naididae). Estuarine, Coastal and Shelf Science, 46(1), 85–91. https://doi.org/10.1006/ecss.1997.0253	x
374	Peterson, M. B., & Duerr, F. G. (1969).	Studies on osmotic adjustment in Tegula funebralis (Adams 1854). Comparative Biochemistry and Physiology, 28(2), 633–644. https://doi.org/10.1016/0010-406X(69)92094-5								x
375	Picken, L. (1937).	The mechanism of urine formation in invertebrates: II. The excretory mechanism in certain Mollusca. Journal of Experimental Biology, 14(1), 20–34.	x
376	Pierce, S. K., & Rowland, L. M. (1988).	Proline betaine and amino acid accumulation in sea slugs (Elysia chlorotica) exposed to extreme hyperosmotic conditions. Physiological zoology, 61(3), 205–212.												x															only high salinity treatment
377	Pierce, S. K, & Rowland-Faux, L. M. (1992).	Ionomycin produces an improved volume recovery by an increased efflux of taurine from hypoosmotically stressed molluscan red blood cells. Cell Calcium, 13(5), 321–327. https://doi.org/10.1016/0143-4160(92)90067-3										x
378	Pierce, S. K., & Greenberg, M. J. (1972).	The initiation and control of free amino acid regulation of cell volume in salinity-stressed marine bivalves. Journal of Experimental Biology, 59(2), 435–446.													x		x
379	Pierce, S. K., Politis, A. D., Cronkite, D. H., Rowland, L. M., & Smith, L. H. (1989).	Evidence of calmodulin involvement in cell volume recovery following hypo-osmotic stress. Cell Calcium, 10(3), 159–169. https://doi.org/10.1016/0143-4160(89)90070-5								x
380	Pierce, S., & Greenberg, M. (1976).	Hypo-Osmotic Cell-Volume Regulation in Marine Bivalves—Effects of Membrane-Potential Change and Metabolic Inhibition. Physiological Zoology, 49(4), 417–424. https://doi.org/10.1086/physzool.49.4.30155704									x
381	Pierce, Sidney K, Politis, A. D., Smith, L. H., & Rowland, L. M. (1988).	A Ca2+ influx in response to hypo-osmotic stress may alter osmolyte permeability by a phenothiazine-sensitive mechanism. Cell Calcium, 9(3), 129–140. https://doi.org/10.1016/0143-4160(88)90016-4								x
382	Pierce, Sidney K. (1971b).	Volume regulation and valve movements by marine mussels. Comparative Biochemistry and Physiology Part A: Physiology, 39(1), 103–117. https://doi.org/10.1016/0300-9629(71)90350-1	x
383	Pierce, Sidney K. (1982).	Invertebrate cell volume control mechanisms: A coordinated use of intracellular amino acids and inorganic ions as osmotic solute. The Biological Bulletin, 163(3), 405–419.		x
384	Pierce, Sidney K. (1994).	Osmolyte permeability in molluscan red cells is regulated by Ca2+ and membrane protein phosphorylation: The present perspective. Journal of Experimental Zoology, 268(2), 166–170. https://doi.org/10.1002/jez.1402680215	x
385	Pierce, Sidney K., & Amende, L. M. (1981).	Control mechanisms of amino acid-mediated cell volume regulation in salinity-stressed molluscs. Journal of Experimental Zoology, 215(3), 247–257. https://doi.org/10.1002/jez.1402150304		x
386	Pierce, Sidney K., & Greenberg, M. J. (1972).	The Nature of Cellular Volume Regulation In Marine Bivalves. Journal of Experimental Biology, 57(3), 681–692.													x		x
387	Pierce, Sidney K., & Minasian, L. L. (1974).	Water balance of a euryhaline sea anemone, Diadumene leucolena. Comparative Biochemistry and Physiology Part A: Physiology, 49(1), 159–167. https://doi.org/10.1016/0300-9629(74)90551-9															x
388	Pierce, Sidney K., & Politis, A. D. (1990).	Ca2+-activated cell volume recovery mechanisms. Annual review of physiology, 52(1), 27–42.		x						x
389	Pierce, Sidney K., & Warren, J. W. (2001).	The Taurine Efflux Portal Used to Regulate Cell Volume in Response to Hypoosmotic Stress Seems to Be Similar in Many Cell Types: Lessons to Be Learned from Molluscan Red Blood Cells. Integrative and Comparative Biology, 41(4), 710–720. https://doi.org/10.1093/icb/41.4.710	x
390	Pierce, Sidney K., Dragolovich, J., & Crombie, B. N. (1997).	Variations in intracellular choline levels may account for differences in glycine betaine synthesis between conspecific oyster populations responding to hyperosmotic stress. Journal of Experimental Zoology, 278(5), 283–289. https://doi.org/10.1002/(SICI)1097-010X(19970801)278:5<283::AID-JEZ2>3.0.CO;2-L	x
391	Polites, G., & Mangum, C. P. (1980).	Oxygen uptake and transport in the prosobranch mollusc Busycon canaliculatum (L.) II. Influence of acclimation salinity and temperature. The Biological Bulletin, 158(1), 118–128.								x	x
392	Politis, A. D., & Pierce, S. K. (1991).	Specific protein phosphorylation occurs in molluscan red blood cell ghosts in response to hypoosmotic stress. The Journal of Membrane Biology, 124(2), 169–177. https://doi.org/10.1007/BF01870461	x
393	Potts, W. T. W. (1954).	The inorganic composition of the blood of Mytilus edulis and Anodonta cygnea. Journal of Experimental Biology, 31(3), 376–385.				x						x
394	Pranal, V., Fiala-Médioni, A., & Colomines, J. (1995).	Amino acid and related compound composition in two symbiotic mytilid species from hydrothermal vents. Marine Ecology Progress Series, 155–166.						x
395	Preston, R. L. (1993).	Transport of amino acids by marine invertebrates. Journal of Experimental Zoology Part A: Ecological Genetics and Physiology, 265(4), 410–421.		x
396	Preston, R. L., & Stevens, B. R. (1982).	Kinetic and thermodynamic aspects of sodium-coupled amino acid transport by marine invertebrates. American zoologist, 22(3), 709–721.	x				x
397	Prior, D. J., & Pierce, S. K. (1981).	Adaptation and tolerance of invertebrate nervous systems to osmotic stress. Journal of Experimental Zoology Part A: Ecological Genetics and Physiology, 215(3), 237–245.						x
398	Prusch, R. D. (1977).	Solute Secretion By The Tube Foot Epithelium In The Starfish Asterias Forbesi. Journal of Experimental Biology, 68(1), 35–43.										x
399	Prusch, R. D., & Whoriskey, F. (1976).	Maintenance of fluid volume in the starfish water vascular system. Nature, 262(5569), 577. https://doi.org/10.1038/262577a0		x
400	Pruski, A. M., Fiala-Médioni, A., Fisher, C. R., & Colomines, J. C. (2000).	Composition of free amino acids and related compounds in invertebrates with symbiotic bacteria at hydrocarbon seeps in the Gulf of Mexico. Marine Biology, 136(3), 411–420.						x
401	Prymaczok, N. C., Chaulet, A., Alberto Medesani, D., & Marcelo Rodriguez, E. (2012).	Survival, growth, and physiological responses of advanced juvenile freshwater crayfish (Cherax quadricarinatus), reared at low temperature and high salinities. Aquaculture, 334, 176–181. https://doi.org/10.1016/j.aquaculture.2011.12.032				x
402	Pullin, R. S. V. (1971).	Composition of the haemolymph of Lymnaea truncatula, the snail host of Fasciola hepatica. Comparative Biochemistry and Physiology -- Part A: Physiology, 40(3), 617–626. Scopus. https://doi.org/10.1016/0300-9629(71)90246-5										x
403	Quinn, R. H., & Pierce, S. K. (1992).	The ionic basis of the hypo-osmotic depolarization in neurons from the opisthobranch mollusc Elysia chlorotica. Journal of Experimental Biology, 163(1), 169–186.								x
404	Raghupathiramireddy, S., & Pampapathi Rao, K. (1963).	Physiology of low temperature acclimation in tropical poikilotherms. Proceedings: Plant Sciences, 58(1), 1–10.						x
405	Rahman, S., Park, J., & Kim, J. (2017).	Osmolytes Offset the Urea’s Effect on Protein Structure and Function. In Cellular Osmolytes (S. 77–96). Springer.	x
406	Rainbow, P. S. (1995).	Physiology, physicochemistry and metal uptake—A crustacean perspective. Marine Pollution Bulletin, 31(1), 55–59. https://doi.org/10.1016/0025-326X(95)00005-8	x
407	Ramamurthi, R. (1968).	Oxygen consumption of the common indian cattle leech Poecilobdella granulosa in relation to osmotic stress. Comparative Biochemistry and Physiology, 24(1), 283–287. https://doi.org/10.1016/0010-406X(68)90977-8				x					x
408	Ramsay, J. A. (1949).	The osmotic relations of the earthworm. Journal of Experimental Biology, 26(1), 46–56.				x
409	Rao, B. V. S. S. R. S. (1978).	Osmotic Regulation in a Brackish Water Oligochaete, Pontodrilus bermudensis Beddard. IJMS Vol.07(2) [June 1978]. http://nopr.niscair.res.in/handle/123456789/39409								x
410	Rasmussen, A. D., & Andersen, O. (2000).	Effects of cadmium exposure on volume regulation in the lugworm, Arenicola marina. Aquatic Toxicology, 48(2), 151–164. https://doi.org/10.1016/S0166-445X(99)00045-4	x
411	Rasmussen, A., & Andersen, O. (1996).	Apparent water permeability as a physiological parameter in crustaceans. Journal of Experimental Biology, 199(12), 2555–2564.	x
412	Reid, D. M. (1929).	On some Factors Limiting the Habitat of Arenicola marina. Journal of the Marine Biological Association of the United Kingdom, 16(1), 109–116. https://doi.org/10.1017/S0025315400029738	x
413	Reitze, M., & Schöttler, U. (1989).	The time dependence of adaption to reduced salinity in the lugworm Arenicola marina L. (Annelida: Polychaeta). Comparative Biochemistry and Physiology Part A: Physiology, 93(3), 549–559. https://doi.org/10.1016/0300-9629(89)90009-1								x
414	Rice, M. A., & Stephens, G. C. (1987).	Uptake and internal distribution of exogenously supplied amino acids in the Pacific oyster, Crassostrea gigas (Thunberg). Aquaculture, 66(1), 19–31. https://doi.org/10.1016/0044-8486(87)90280-8									x
415	Rice, M. A., & Stephens, G. C. (1988).	Influx, net flux and transepithelial flux of amino acids in the hardshell clam Mercenaria mercenaria (Linne): Influence of salinity. Comparative Biochemistry and Physiology Part A: Physiology, 89(4), 631–636. https://doi.org/10.1016/0300-9629(88)90845-6								x
416	Rice, M. E. (1993).	Sipuncula.	x
417	Riley, R. T. (1980).	The effect of prolonged starvation on the relative free amino acid composition of the extracellular body fluids and protein bound amino acids in the oyster, Crassostrea gigas. Comparative Biochemistry and Physiology Part A: Physiology, 67(2), 279–281. https://doi.org/10.1016/0300-9629(80)90277-7						x
418	Robertson, J. D. (1949).	Ionic Regulation in Some Marine Invertebrates. Journal of Experimental Biology, 26(2), 182–200.								x
419	Robertson, J. D. (1953).	Further Studies on Ionic Regulation in Marine Invertebrates. Journal of Experimental Biology, 30(2), 277–296.										x
420	Robertson, J. D. (1954).	The chemical composition of the blood of some aquatic chordates, including members of the Tunicata, Cyclostomata and Osteichthyes. Journal of Experimental Biology, 31(3), 424–442.										x
421	Robertson, J. D. (1960).	Studies on the Chemical Composition of Muscle Tissue: I. The Muscles of the Hagfish Myxine Glutinosa L. and the Roman Eel Muraena Helena L. Journal of Experimental Biology, 37(4), 879–888.										x
422	Robertson, J. D. (1961).	Studies on the Chemical Composition of Muscle Tissue: II. The Abdominal Flexor Muscles of the Lobster Nephrops Norvegicus (L.). Journal of Experimental Biology, 38(4), 707–728.										x
423	Robertson, J. D. (1965).	Studies on the Chemical Composition of Muscle Tissue: III. The Mantle Muscle of Cephalopod Molluscs. Journal of Experimental Biology, 42(1), 153–175.				x						x
424	Robertson, J. D. (1970).	Osmotic and ionic regulation in the horseshoe crab Limulus polyphemus (Linnaeus). The Biological Bulletin, 138(2), 157–183.				x
425	Robertson, J. D. (1980).	Osmotic constituents of some echinoderm muscles. Comparative Biochemistry and Physiology Part A: Physiology, 67(4), 535–543. https://doi.org/10.1016/0300-9629(80)90238-8										x
426	Robertson, J. D. (1989).	Osmotic constituents of the blood plasma and abdominal muscle of the stomatopod, Squilla mantis. Comparative Biochemistry and Physiology Part A: Physiology, 94(3), 493–497. https://doi.org/10.1016/0300-9629(89)90127-8										x
427	Robertson, J. D. (1990).	Ionic composition of the coelomic fluid of three marine worms, the priapulid Priapulus caudatus lamarck, and the sipunculans Sipunculus nudus L. and Golfingia vulgaris (de blainville). Comparative Biochemistry and Physiology Part A: Physiology, 97(1), 87–90. https://doi.org/10.1016/0300-9629(90)90726-9										x
428	Robertson, J. D., Cowey, C. B., & Leaf, G. (1992).	The free amino acids in muscle of three marine invertebrates Nephrops norvegicus (L.), Limulus polyphemus (L.) and Eledone cirrhosa (lamarck). Comparative Biochemistry and Physiology Part A: Physiology, 101(3), 545–548. https://doi.org/10.1016/0300-9629(92)90506-L				x						x
429	Robin, Y., Pradel, L. A., Thoai, N. -v, & Roche, J. (1959).	Sur les constituants guanidiques de quelques annélides polychètes du bassin méditerranéen et sur le phosphagène du spirographe. Comptes rendus des séances de la Société de Biologie et de ses filiales, 153(1), 54–57.						x
430	Robin, Y., & Roche, J. (1954).	Presence of taurocyamine (guanidotaurine) in coelenterates and sponges. Comptes rendus des seances de la Societe de biologie et de ses filiales, 148(21–22), 1783–1785.	x					x
431	Robin, Yvonne, & van Thoai, N. (1962).	Sur une nouvelle guanidine monosubstituée biologique, l’hypotaurocyamine (acide 2-guanidoéthanesulfinique) et le phosphagène correspondant. Biochimica et Biophysica Acta, 63(3), 481–488.	x					x
432	Rocha, R. M., Castellano, G. C., & Freire, C. A. (2017).	Physiological tolerance as a tool to support invasion risk assessment of tropical ascidians. Marine Ecology Progress Series, 577, 105–119. https://doi.org/10.3354/meps12225								x
433	Roche, J., & Robin, Y. (1954).	Sur les phosphagenes des Sponges. Comptes Rendus Sot. BioZ., 148, 1541–1543.						x
434	Roche, J., Robin, Y., Thoai, N.-V., & Pradel, L. A. (1960).	Sur les dérivés guanidiques et le phosphagène de quelques annelides polychètes de la baie de Naples et du mollusque Arca noae L. Comparative Biochemistry and Physiology, 1(1), 44–55.	x					x
435	Roche, J., Robin, Y., Jeso, F. di, & Thoai, N. (1962).	Sur la présence de phosphohypotaurocyamine chez l’arénicole, Arenicola marina L. Comptes rendus des séances de la Société de Biologie et de ses filiales, 156, 830–834.	x
436	Roe, D. A. (1965).	NUTRIENT REQUIREMENTS IN PSORIASIS. New York state journal of medicine, 65, 1319.	x					x
437	Roe, Daphne A., & Weston, M. O. (1965).	Potential Significance of Free Taurine in the Diet. Nature, 205(4968), 287. https://doi.org/10.1038/205287a0						x
438	Roots, B. I. (1956).	The Water Relations of Earthworms: II. Resistance to Desiccation and Immersion, and Behaviour When Submerged and When Allowed a Choice of Environment. Journal of Experimental Biology, 33(1), 29–44.	x
439	Rothschild, Lord, & Barnes, H. (1953).	The Inorganic Constituents of the Sea-Urchin Egg. Journal of Experimental Biology, 30(4), 534–544.								x
440	Ruebush, T. K. (1940).	Morphology, encapsulation and osmoregulation of Dinophilus gardineri Moore. Transactions of the American Microscopical Society, 59(2), 205–223.	x
441	Ruiz, J. L., & Souza, M. M. (2008).	Osmotic stress and muscle tissue volume response of a freshwater bivalve. Comparative Biochemistry and Physiology Part A: Molecular & Integrative Physiology, 151(3), 399–406. https://doi.org/10.1016/j.cbpa.2007.03.028								x
442	Saavateev, V. B. (1952).	On the physiology of adaptations in Balanus to salinity oscillations. Zool. Zhurn., 31, 801–805.																	language
443	Sabourin, T. D., & Stickle, W. B. (1980).	Respiratory and osmoregulatory responses of the hermit crab, Clibanarius vittatus (Bosc), to salinity changes. Journal of Experimental Marine Biology and Ecology, 46(2), 241–254. https://doi.org/10.1016/0022-0981(80)90034-9								x
444	Sansone, G., Cotugno, M., Cosma, I., & Zatta, P. (1987).	The effect of β-alanine on the concentration of taurine and other free amino acids during osmotic stress of <span class="italic">Mytilus galloprovincialis</span>. Journal of the Marine Biological Association of the United Kingdom, 67(1), 111–117. https://doi.org/10.1017/S0025315400026394										x
445	Sayles, L. P. (1935).	THE EFFECTS OF SALINITY CHANGES ON BODY WEIGHT AND SURVIVAL OF NEREIS VIRENS. The Biological Bulletin, 69(2), 233–244. https://doi.org/10.2307/1537422	x
446	Scheide, J., & Bonaminio, P. (1994).	Effect of Low Water Temperature on Ion Balance in the Zebra Mussel, Dreissena-Polymorpha, and the Unionid Mussel, Lampsilis-Radiata. Nautilus, 107(4), 113–117.				x						x
447	Schlichter, D. (1973).	Nutritional and ecological aspects of the uptake of dissolved amino acids by Anemonia sulcata (Coelenterata, Anthozoa). Oecologia, 11(4), 315–350. Scopus. https://doi.org/10.1007/BF00345703									x
448	Schlieper, C. (1960).	Genotypische und phaenotypische Temperatur und Salzgehalts Adaptationen bei merinen Bodenvertebraten der Nord und Ostsee. Kieler Meeresforsch, 16, 180–185.	x
449	Schlieper, Carl. (1929).	Über die Einwirkung niederer Salzkonzentrationen auf marine Organismen. Journal of Comparative Physiology A: Neuroethology, Sensory, Neural, and Behavioral Physiology, 9(2), 478–514.				x				x
450	Schmidt, C. L. A., & Watson, T. (1918).	A Method for the Preparation of Taurin in Large Quantities. Journal of Biological Chemistry, 33(3), 499–500.	x
451	Schmidt-Nielsen & Schmidt-Nielsen 1923	Beiträge zur Kenntnis des osmatischen Druckes der Fische. Verlag nicht ermittelbar.													x		x
452	Schoffeniels, E. (1970).	Osmoregulation in aquatic arthropods. Chemical Zoology, 5, 255–286.		x		x
453	Schoffeniels, E. (1973).	Amino acid metabolism and cell volume regulation. Comparative Physiology, Locomotion, Respiration, Transport and Blood (ed. L. Bolis, K. Schmidt-Nielsen and SHP.				x
454	Schoffeniels, E. (1976).	Biochemical approaches to osmoregulatory processes in Crustacea. In Zoology (S. 107–124). Elsevier.				x
455	Schoffeniels, E. (1977).	Adaptation of bioenergetic processes in relation to various environments and to the size of the organism. In Living systems as energy converters (S. 261–270). Elsevier.	x
456	Schöne, C. (1971).	Über den Einfluß von Nahrung und Substratsalinität auf Verhalten, Fortpflanzung und Wasserhaushalt von Enchytraeus albidus Henle (Oligochaeta). Oecologia, 6(3), 254–266. https://doi.org/10.1007/BF00344918	x
457	Schöttler, U., Daniels, D., & Zapf, K. (1990).	Influence of anoxia on adaptation of euryhaline polychaetes to hyposmotic conditions. Marine Biology, 104(3), 443–451. https://doi.org/10.1007/BF01314348																x	no normoxic treatment
458	Schwabe, E. (1933).	Über die osmoregulation verschiedener Krebse (Malacostracen). Zeitschrift für vergleichende Physiologie, 19(1), 183–236.										x
459	Segal, E., & Dehnel, P. A. (1962).	Osmotic behavior in an intertidal limpet, acmaea limatula. The Biological Bulletin, 122(3), 417–430. https://doi.org/10.2307/1539241								x
460	Shakhmatova, E. I., Berger, V. Ya., & Natochin, Yu. V. (2006).	Cations in molluscan tissues at sharply different hemolymph osmolality. Biology Bulletin, 33(3), 269–275. https://doi.org/10.1134/S1062359006030095								x		x
461	Shakmatova, E., Karpenko, L., Berger, V., & Natochin, Y. (1990).	Regulation of cell volume of moolusks and fishes during adaptation to salinity changes. Biologiya Morya - Marine Biology, 5, 37–42.								x
462	Sharma, M. L. (1968).	Studies on the sources and mechanism of increased urea production by Orconectes rusticus under osmotic stress. Comparative Biochemistry and Physiology, 24(1), 55–60. https://doi.org/10.1016/0010-406X(68)90957-2	x
463	Shibuya, S., & Ouchi, S. (1957).	Isolation of 2-aminoethanesulphinic acid from a mollusc. Nature, 180(4585), 549.	x				x
464	Shick, J. M. (1973).	Effects of salinity and starvation on the uptake and utilization of dissolved glycine by Aurelia aurita polyps. The Biological Bulletin, 144(1), 172–179.	x
465	Shick, J. M. (1976).	Ecological Physiology and Genetics of the Colonizing Actinian Haliplanella Luciae. In Coelenterate Ecology and Behavior (S. 137–146). Springer, Boston, MA. https://doi.org/10.1007/978-1-4757-9724-4_15													x		x
466	Shick, J. M. (1991).	Nitrogen excretion and osmotic balance. In A Functional Biology of Sea Anemones (S. 174–197). Springer.		x
467	Shinagawa, A., Suzuki, T., & Konosu, S. (1992).	The Role of Free Amino-Acids and Betaines in Intracellular Osmoregulation of Marine Sponges. Nippon Suisan Gakkaishi, 58(9), 1717–1722.								x
468	Shumway, S. E. (1977b).	The effects of fluctuating salinities on four species of asteroid echinoderms. Comparative Biochemistry and Physiology Part A: Physiology, 58(2), 177–179. https://doi.org/10.1016/0300-9629(77)90222-5										x
469	Shumway, S. E., & Davenport, J. (1977).	Some aspects of the physiology of Arenicola marina (Polychaeta) exposed to fluctuating salinities. Journal of the Marine Biological Association of the United Kingdom, 57(4), 907–924.							x
470	Shumway, S. E., & Youngson, A. (1979).	The effects of fluctuating salinity on the physiology of Modiolus demissus (Dillwyn). Journal of Experimental Marine Biology and Ecology, 40(2), 167–181.							x
471	Siebers, D., & Winkler, A. (1984).	Amino-acid uptake by mussels, Mytilus edulis, from natural sea water in a flow-through system. Helgoländer Meeresuntersuchungen, 38(1), 189.	x
472	Silva, ARNOLD L., & Wright, S. H. (1992).	Integumental taurine transport in Mytilus gill: Short-term adaptation to reduced salinity. Journal of experimental biology, 162(1), 265–279.	x
473	Simon, S. E., Muller, J., & Dewhurst, D. J. (1964).	Ionic partition in Holothuroidean muscle. Journal of Cellular and Comparative Physiology, 63(1), 77–84. https://doi.org/10.1002/jcp.1030630109					x
474	Simpson, J. W., Allen, K., & Awapara, J. (1959).	Free amino acids in some aquatic invertebrates. The Biological Bulletin, 117(2), 371–381. https://doi.org/10.2307/1538916					x
475	Singh, L. R., Dar, T. A., & Ahmad, F. (2009).	Living with urea stress. Journal of Biosciences, 34(2), 321–331. https://doi.org/10.1007/s12038-009-0036-0	x
476	Skaer, H. L. B. (1974).	The water balance of a serpulid polychaete, Mercierella enigmatica (Fauvel): I. Osmotic concentration and volume regulation. Journal of Experimental Biology, 60(2), 321–330.								x		x
477	Smith Jr, L. H., & Pierce, S. K. (1987).	Cell volume regulation by molluscan erythrocytes during hypoosmotic stress: Ca2+ effects on ionic and organic osmolyte effluxes. The Biological Bulletin, 173(2), 407–418.										x
478	Smith, H. W. (1932).	Water regulation and its evolution in the fishes. The Quarterly Review of Biology, 7(1), 1–26.	x
479	Smith, R. I. (1964).	D 2 O Uptake Rate in Two Brackish-Water Nereid Polychaetes. Biological Bulletin, 142–149.				x
480	Smith, R. I. (1970a).	Hypo-osmotic urine in Nereis diversicolor. Journal of Experimental Biology, 53(1), 101–108.				x
481	Smith, R. I. (1970b).	Chloride Regulation at Low Salinities by Nereis Diversicolor (Annelida, Polychaeta): I. Uptake and Exchanges of Chloride. Journal of Experimental Biology, 53(1), 75–92.				x
482	Sokolova, I. M., & Pörtner, H. O. (2001).	Physiological adaptations to high intertidal life involve improved water conservation abilities and metabolic rate depression in Littorina saxatilis. Marine Ecology Progress Series, 224, 171–186. https://doi.org/10.3354/meps224171								x
483	Sokolova, I. M., Bock, C., & Portner, H. O. (2000).	Resistance to freshwater exposure in White Sea Littorina spp. II: Acid-base regulation. Journal of Comparative Physiology B-Biochemical Systemic and Environmental Physiology, 170(2), 105–115. https://doi.org/10.1007/s003600050265	x
484	Sokolova, I. M., Bock, C., & Pörtner, H.-O. (2000).	Resistance to freshwater exposure in White Sea Littorina spp. I: Anaerobic metabolism and energetics. Journal of Comparative Physiology B: Biochemical, Systemic, and Environmental Physiology, 170(2), 91–103.								x
485	Sokolowski, A., Wolowicz, M., & Hummel, H. (2003).	Free amino acids in the clam Macoma balthica L. (Bivalvia, Mollusca) from brackish waters of the southern Baltic Sea. Comparative Biochemistry and Physiology Part A: Molecular & Integrative Physiology, 134(3), 579–592. https://doi.org/10.1016/S1095-6433(02)00360-4																	In situ study: Salinity variation < 1 psu
486	Solan, M., & Whiteley, N. (2016).	Stressors in the Marine Environment: Physiological and ecological responses; societal implications. Oxford University Press.		x
487	Solorzano, Y., Viana, M. T., López, L. M., Correa, J. G., True, C. C., & Rosas, C. (2009).	Response of newly hatched Octopus bimaculoides fed enriched Artemia salina: Growth performance, ontogeny of the digestive enzyme and tissue amino acid content. Aquaculture, 289(1), 84–90. https://doi.org/10.1016/j.aquaculture.2008.12.036					x
488	Somero, G. N. (1992).	Adapting to water stress: Convergence on common solutions. In Water and Life (S. 3–18). Springer.		x
489	Somero, G. N., & Bowlus, R. D. (1983).	Osmolytes and metabolic end products of molluscs: The design of compatible solute systems. In The Mollusca, Volume 2 (S. 77–100). Elsevier.		x
490	Somero, George N., & Yancey, P. H. (2011).	Osmolytes and Cell-Volume Regulation: Physiological and Evolutionary Principles. In Comprehensive Physiology (S. 441–484). American Cancer Society. https://doi.org/10.1002/cphy.cp140110		x
491	Southward, A., & Southward, E. (1972).	Observations on the role of dissolved organic compounds in the nutrition of benthic invertebrates: II. Uptake by other animals living in the same habitat as pogonophores, and by some littoral polychaeta. Sarsia, 48(1), 61–70.	x
492	Spaargaren, D. H. (1973).	The effect of salinity and temperature on the heart rate of osmoregulating and osmoconforming shrimps. Comparative Biochemistry and Physiology -- Part A: Physiology, 45(3), 773–786. Scopus. https://doi.org/10.1016/0300-9629(73)90080-7	x
493	Staaland, H. (1970).	Volume regulation in the common whelk, Buccinum undatum L. Comparative Biochemistry and Physiology, 34(2), 355–365. https://doi.org/10.1016/0010-406X(70)90177-5									x
494	Stephens, G. C. (1985).	Regulation of uptake of free amino acids in eukaryote marine organisms. In Transport Processes, Iono-and Osmoregulation (S. 280–291). Springer.	x
495	Stephens, Grover C. (1968).	Dissolved Organic Matter as a Potential Source of Nutrition for Marine Organisms. Integrative and Comparative Biology, 8(1), 95–106. https://doi.org/10.1093/icb/8.1.95						x
496	Stevens, B. R., & Preston, R. L. (1980a).	Sodium-dependent steady state L-alanine accumulation by the body wall of Glycera dibranchiata. Journal of Experimental Zoology, 212(1), 139–146. https://doi.org/10.1002/jez.1402120118	x
497	Stevens, B. R., & Preston, R. L. (1980b).	The effect of sodium on the kinetics of L-alanine influx by the integument of the marine polychaete, Glycera dibranchiata. Journal of Experimental Zoology, 212(1), 129–138. https://doi.org/10.1002/jez.1402120117	x
498	Stevens, B. R., & Preston, R. L. (1980c).	The transport of L-alanine by the integument of the marine polychaete, Glycera dibranchiata. Journal of Experimental Zoology, 212(1), 119–127. https://doi.org/10.1002/jez.1402120116								x
499	Stevens, T. M., Howard, C. W., & Schlesinger, R. W. (1961).	Free amino acids in sera of the marine invertebrates, Cancer irroratus, Limulus polyphemus and Homarus americanus. Comparative biochemistry and physiology, 3(4), 310–314.						x
500	Stewart, M. G. (1978).	Kinetics of neutral amino-acid transport by isolated gill tissue of the bivalve Mya arenaria (L.). Journal of Experimental Marine Biology and Ecology, 32(1), 39–52. https://doi.org/10.1016/0022-0981(78)90098-9	x
501	Stewart, Michael G., & Bamford, D. R. (1976).	The effect of environmental factors on the absorption of amino acids by isolated gill tissue of the bivalve, Mya arenaria (L.). Journal of Experimental Marine Biology and Ecology, 24(2), 205–212. https://doi.org/10.1016/0022-0981(76)90104-0	x
502	Stickle, William B, & Ahokas, R. (1974).	The effects of tidal fluctuation of salinity on the perivisceral fluid composition of several echinoderms. Comparative Biochemistry and Physiology Part A: Physiology, 47(2), 469–476. https://doi.org/10.1016/0300-9629(74)90010-3								x
503	Stickle, William B, & Ahokas, R. (1975).	The effects of tidal fluctuation of salinity on the hemolymph composition of several molluscs. Comparative Biochemistry and Physiology Part A: Physiology, 50(2), 291–296. https://doi.org/10.1016/0300-9629(75)90015-8								x
504	Suresh, P. G., Reju, M. K., & Mohandas, A. (1995).	Haemolymph ionic concentration in freshwater gastropods: A comparative study. Comparative Haematology International, 5(1), 25–30. https://doi.org/10.1007/BF00214487										x
505	Subba-Rao, B., & Ganapati, P. N. (1987).	Regulation of chlorides, sodium and potassium in a brackish-water oligochaete, Pontodrilus bermudensis Beddard. Balkema.				x
506	Sugino, K., Odo, K., Sekine, T., Ichikawa, E., & Watanabe, K. (1951).	Basic amino acids and other basic substances in the extract of the clam. J. Chem. Soc. Japan, 72, 252–255.						x
507	Sutcliffe, D. W. (1962).	Inted in Great Britain THE COMPOSITION OF HAEMOLYMPH IN AQUATIC INSECTS.				x
508	Sutcliffe, D. W. (1963).	The chemical composition of haemolymph in insects and some other arthropods, in relation to their phylogeny. Comparative Biochemistry and Physiology, 9(2), 121–135.			x
509	Suyama, M., & Tokuhiro, T. (1954).	Urea Content and Ammonia Formation of the Muscle of Cartilaginous Fishes. NIPPON SUISAN GAKKAISHI, 19(10), 1003–1006. https://doi.org/10.2331/suisan.19.1003						x
510	Tanaka, S. (1960).	2-Aminoethanesulfinic acid of oysters. Nagasaki Igakkai Zasshi, 35, 1666–1668.	x
511	Tarr, K. J. (1977).	An analysis of water-content regulation in osmoconforming limpets (Mollusca: Patellacea). Journal of Experimental Zoology, 201(2), 259–267. https://doi.org/10.1002/jez.1402010210								x
512	Tarussoff, B. (1930).	Über Zellpermeabilität und Anpassungsfähigkeit bei Wassertieren. Protoplasma, 9(1), 97–105. https://doi.org/10.1007/BF01943335	x
513	Taylor, P. M., & Andrews, E. B. (1988).	Osmoregulation in the intertidal gastropod Littorina littorea. Journal of Experimental Marine Biology and Ecology, 122(1), 35–46. https://doi.org/10.1016/0022-0981(88)90210-9								x
514	Tentori, E., & Lockwood, A. P. M. (1990).	Haemolymph magnesium levels in some oceanic crustacea. Comparative Biochemistry and Physiology Part A: Physiology, 95(4), 545–548. https://doi.org/10.1016/0300-9629(90)90736-C						x
515	Thabet, R., Ayadi, H., Koken, M., & Leignel, V. (2017).	Homeostatic responses of crustaceans to salinity changes. Hydrobiologia, 799(1), 1–20. https://doi.org/10.1007/s10750-017-3232-1		x
516	Thoai, N. V. (1957).	Sur la taurocyamine et la glycocyamine phosphokinase. Bull. Soc. Chim. Biol., 39, 197–208.						x
517	Thoai, N. V., & Robin, Y. (1964).	Distribution of phosphagens in errant and sedentary polychaeta. Studies in Comparative Biochemistry, 152–161.	x
518	Thoai, N. V., & Robin, Y. (1954).	Métabolisme des dérivés guanidylés: IV. Sur une nouvelle guanidine monosubstituée biologique: L’ester guanidoéthylsérylphosphorique (lombricine) et le phosphagène correspondant. Biochimica et Biophysica Acta, 14, 76–79.						x
519	Thoai, N. V., & Robin, Y. (1954).	Métabolisme des dérivés guanidylés II. Isolement de la guanidotaurine (taurocyamine) et de l’acide guanidoacétique (glycocyamine) des vers marins. Biochimica et Biophysica Acta, 13, 533–536. https://doi.org/10.1016/0006-3002(54)90370-4						x
520	Thoai, N. V., Roche, J., Robin, Y., & Thiem, N.-V. (1953).	Sur deux nouveaux phosphagenes: La phosphotaurocyamine et la phosphoglycocyamine. Compt. Rend. Soc. Biol., 147, 1241–1243.	x					x
521	Thoai, N.-V., Roche, J., Robin, Y., & Thiem, N.-V. (1953).	Sur la présence de la glycocyamine (acide guanidylacétique), de la taurocyamine (guanidyltaurine) et des phosphagènes correspondants dans les muscles de vers marins. Biochimica et Biophysica Acta, 11, 593.	x					x
522	Thoai, N. V., Zappacosta, S., & Robin, Y. (1963).	Biogenese de deux guanidines soufrees: La taurocyamine et l’hypotaurocyamine. Comparative Biochemistry and Physiology, 10(3), 209–225. https://doi.org/10.1016/0010-406X(63)90035-5						x
523	Thompson, D. P., & Geary, T. G. (2002).	11. Excretion/Secretion, Ionic and Osmotic Regulation. The Biology of Nematodes, 291.	x
524	Timasheff, S. N. (1992).	A Physicochemical Basis for the Selection of Osmolytes by Nature. In George Nicholls Somero, C. B. Osmond, & C. L. Bolis (Hrsg.), Water and Life (S. 70–84). Springer Berlin Heidelberg. https://doi.org/10.1007/978-3-642-76682-4_6					x
525	Todd, M. E. (1964).	Osmotic balance in Littorina littorea, L. littoralis, and L. saxatilis (Littorinidae). Physiological Zoology, 37(1), 33–44.								x
526	Tomanek, L. (2012).	Environmental proteomics of the mussel Mytilus: Implications for tolerance to stress and change in limits of biogeographic ranges in response to climate change.	x
527	Tonomura, Y., Yagi, K., & Matsumiya, H. (1956).	Contractile proteins from adductors of pecten. II. Interaction with adenosine triphosphate. Archives of Biochemistry and Biophysics, 64(2), 466–479. https://doi.org/10.1016/0003-9861(56)90289-2	x
528	Topping, F. L., & Fuller, J. L. (1942).	The accommodation of some marine invertebrates to reduced osmotic pressures. The Biological Bulletin, 82(3), 372–384. https://doi.org/10.2307/1537983	x
529	Toulmond, A., & Jouin, C. (1992).	Seawater salinity and blood acid-base balance in the lugworm, Arenicola marina (L.). Respiration Physiology, 87(3), 429–446. https://doi.org/10.1016/0034-5687(92)90023-P	x
530	Trede, G., & Becker, W. (1982).	Effects of starvation and infection with Schistosoma mansoni on the release rate of free amino acids (FAA) by Biomphalaria glabrata. Comparative Biochemistry and Physiology Part B: Comparative Biochemistry, 73(2), 405–409. https://doi.org/10.1016/0305-0491(82)90305-4										x
531	Treherne, J. E. (1980).	Neuronal adaptations to osmotic and ionic stress. Comparative Biochemistry and Physiology Part B: Comparative Biochemistry, 67(3), 455–463. https://doi.org/10.1016/0305-0491(80)90333-8	x
532	Treherne, J. E. (1985).	Neuronal Adaptations to Osmotic Stress. In Transport Processes, Iono- and Osmoregulation (S. 376–388). Springer, Berlin, Heidelberg. https://doi.org/10.1007/978-3-642-70613-4_32	x
533	Treherne, J. E., & Pichon, Y. (1978).	Long-term Adaptations of Sabella Giant Axons to Hyposmotic Stress. Journal of Experimental Biology, 75(1), 253–263.	x
534	Tucker, L. E. (1970).	Effects of external salinity on Scutus breviculus (Gastropoda, Prosobranchia)—I. Body weight and blood composition. Comparative Biochemistry and Physiology, 36(2), 301–319.										x
535	Turgeon, K. W. (1973).	OSMOTIC ADJUSTMENT IN TWO POPULATIONS OF UROSALPINX CINEREA (SAY) (MURICIDAE, PROSOBRANCHIA, GASTROPODA).													x				range not specified
536	Tynen, M. J. (1969).	Littoral distribution of Lumbricillus reynoldsoni Backlund and other Enchytraeidae (Oligochaeta) in relation to salinity and other factors. Oikos, 41–53.	x
537	Veiga, M. P. T., Gutierre, S. M. M., Castellano, G. C., & Freire, C. A. (2016).	Tolerance of high and low salinity in the intertidal gastropod Stramonita brasiliensis (Muricidae): Behaviour and maintenance of tissue water content. Journal of Molluscan Studies, 82(1), 154–160. https://doi.org/10.1093/mollus/eyv044								x
538	Vidolin, D., Santos-Gouvea, I. A., & Freire, C. A. (2007).	Differences in ion regulation in the sea urchins Lytechinus variegatus and Arbacia lixula (Echinodermata: Echinoidea). Journal of the Marine Biological Association of the United Kingdom, 87(3), 769–775. https://doi.org/10.1017/S0025315407054124								x
539	Virkar, R. A. (1966).	The role of free amino acids in the adaptation to reduced salinity in the sipunculid Golfingia gouldii. Comparative Biochemistry and Physiology, 18(3), 617–625. https://doi.org/10.1016/0010-406X(66)90245-3										x
540	Vitale, M. A., & Friedl, F. E. (1984).	Ammonia production by the freshwater bivalve Elliptio buckleyi (LEA): Intact and monovalve preparations. Comparative Biochemistry and Physiology Part A: Physiology, 77(1), 113–116. https://doi.org/10.1016/0300-9629(84)90021-5	x
541	Wada, K. (1984).	Osmoregulation in marine bivalves. Tenth US-Japan Meetings on Aquaculture, 89.										x
542	Waite, M. E., & Walker, G. (1992).	Biochemical aspects of Balanus hameri haemolymph, together with some comparative haemolymph data for Balanus balanus and Lepas anatifera. Comparative Biochemistry and Physiology Part B: Comparative Biochemistry, 103(2), 369–374. https://doi.org/10.1016/0305-0491(92)90306-C					x	x
543	Walters, N. J., & Uglow, R. F. (1981).	Haemolymph magnesium and relative heart activity of some species of marine decapod crustaceans. Journal of Experimental Marine Biology and Ecology, 55(2), 255–265. https://doi.org/10.1016/0022-0981(81)90116-7										x
544	Walther, M. (2002).	Taurine in the marine hydrozoan Hydractinia echinata: Stabilizer of the larval state? Comparative Biochemistry and Physiology Part A: Molecular & Integrative Physiology, 133(1), 179–190. https://doi.org/10.1016/S1095-6433(02)00176-9								x
545	Warren, M. K., & Pierce, S. K. (1982).	Two Cell Volume Regulatory Systems in the Limulus Myocardium: An Interaction of Ions and Quaternary Ammonium Compounds. Biological Bulletin, 504–516.				x
546	Webb, K. L., Johannes, R. E., & Coward, S. J. (1971).	Effects of Salinity and Starvation on Release of Dissolved Free Amino Acids by Dugesia dorotocephala and Bdelloura candida [Platyhelminthes, Turbellaria]. The Biological Bulletin, 141(2), 364–371.													x		x
547	Webb, K. L., Schimpf, A. L., & Olmon, J. (1972).	Free amino acid composition of scyphozoan polyps of Aurelia aurita, Chrysaora quinquecirrha and Cyanea capillata at various salinites. Comparative Biochemistry and Physiology Part B: Comparative Biochemistry, 43(3), 653–663.													x		x
548	Weber, R. E., & Spaargaren, D. H. (1979).	Osmotic relations of the coelomic fluid and body wall tissues in Arenicola marina subjected to salinity change. Netherlands Journal of Sea Research, 13(3), 536–546. https://doi.org/10.1016/0077-7579(79)90024-3								x
549	Weihrauch, D., & Allen, G. J. P. (2018).	Correction: Ammonia excretion in aquatic invertebrates: new insights and questions (doi: 10.1242/jeb.169219). The Journal of Experimental Biology, 221(3), jeb178673. https://doi.org/10.1242/jeb.178673	x
550	Weil, E., & Pantin, C. F. A. (1931).	The adaptation of Gunda ulv\a e to salinity. 2. The water exchange. Journal of Experimental Biology, 8, 73–81.	x							x
551	Welborn, J., & Manahan, D. (1995). X	The adaptation of Gunda ulv\a e to salinity. 2. The water exchange. Journal of Experimental Biology, 8, 73–81.								x
552	Whiteley, N. M., Scott, J. L., Breeze, S. J., & McCann, L. (2001).	Effects of water salinity on acid-base balance in decapod crustaceans. Journal of Experimental Biology, 204(5), 1003–1011.				x				x
553	Whitten, B. K., & Goodnight, C. J. (1966).	The comparative chemical composition of two aquatic oligochaetes. Comparative Biochemistry and Physiology, 17(4), 1205–1207. https://doi.org/10.1016/0010-406X(66)90297-0	x
554	Wilcox, S. J., & Dietz, T. H. (1998).	Salinity tolerance of the freshwater bivalve Dreissena polymorpha (Pallas, 1771) (Bivalvia, Dreissenidae). Nautilus, 111(4), 143–148.								x
555	Willmer, P. (2006).	Osmoregulation in Invertebrates. ELS. https://doi.org/10.1038/npg.els.0003646		x
556	Willmer, P. G. (1978).	Volume Regulation and Solute Balance in the Nervous Tissue of an Osmoconforming Bivalve (Mytilus Edulis). Journal of Experimental Biology, 77(1), 157–179.		x
557	Wittmann, A. C., Storch, D., Anger, K., Poertner, H. O., & Sartoris, F. J. (2011).	Temperature-dependent activity in early life stages of the stone crab Paralomis granulosa (Decapoda, Anomura, Lithodidae): A role for ionic and magnesium regulation? JOURNAL OF EXPERIMENTAL MARINE BIOLOGY AND ECOLOGY, 397(1), 27–37. https://doi.org/10.1016/j.jembe.2010.11.005										x
558	Wittmann, A. C., Held, C., Pörtner, H. O., & Sartoris, F. J. (2010).	Ion regulatory capacity and the biogeography of Crustacea at high southern latitudes. Polar Biology, 33(7), 919–928. https://doi.org/10.1007/s00300-010-0768-1										x
559	Wright, S. H., & Secomb, T. W. (1986).	Epithelial Amino Acid Transport in Marine Mussels: Role in Net Exchange of Taurine between Gills and Sea Water. Journal of Experimental Biology, 121(1), 251–270.						x
560	Wright, S. H., Secomb, T. W., & Bradley, T. J. (1987).	Apical membrane permeability of Mytilus gill: Influence of ultrastructure, salinity and competitive inhibitors on amino acid fluxes. Journal of experimental biology, 129(1), 205–230.						x			x
561	Wright, S. H., & Secomb, T. W. (1984).	Epidermal taurine transport in marine mussels. American Journal of Physiology-Regulatory, Integrative and Comparative Physiology, 247(2), R346–R355.					x
562	Wu, H., Liu, X., Zhang, X., Ji, C., Zhao, J., & Yu, J. (2013b).	Proteomic and metabolomic responses of clam Ruditapes philippinarum to arsenic exposure under different salinities. Aquatic Toxicology, 136–137, 91–100. https://doi.org/10.1016/j.aquatox.2013.03.020										x
563	Wu, H., Zhang, X., Wang, Q., Li, L., Ji, C., Liu, X., Zhao, J., & Yin, X. (2013a).	A metabolomic investigation on arsenic-induced toxicological effects in the clam Ruditapes philippinarum under different salinities. Ecotoxicology and Environmental Safety, 90, 1–6. https://doi.org/10.1016/j.ecoenv.2012.02.022										x
564	Yamada, A., & Matsushima, O. (1992).	The relation of d-alanine and alanine racemase activity in molluscs. Comparative Biochemistry and Physiology Part B: Comparative Biochemistry, 103(3), 617–621. https://doi.org/10.1016/0305-0491(92)90379-6										x
565	Yancey, P. H. (2005).	Organic osmolytes as compatible, metabolic and counteracting cytoprotectants in high osmolarity and other stresses. Journal of Experimental Biology, 208(15), 2819–2830. https://doi.org/10.1242/jeb.01730		x
566	Yancey, P. H., Rhea, M. D., Kemp, K., & Bailey, D. M. (2004).	Trimethylamine oxide, betaine and other osmolytes in deep-sea animals: Depth trends and effects on enzymes under hydrostatic pressure. Cellular and Molecular Biology, 50, 371–376.						x
567	Yancey, Paul H, Blake, W. R., & Conley, J. (2002).	Unusual organic osmolytes in deep-sea animals: Adaptations to hydrostatic pressure and other perturbants. Comparative Biochemistry and Physiology Part A: Molecular & Integrative Physiology, 133(3), 667–676. https://doi.org/10.1016/S1095-6433(02)00182-4		x
568	Yancey, Paul H. (2001).	Water Stress, Osmolytes and Proteins. American Zoologist, 41(4), 699–709. https://doi.org/10.1093/icb/41.4.699		x
569	Yancey, Paul H., Heppenstall, M., Ly, S., Andrell, R. M., Gates, R. D., Carter, V. L., & Hagedorn, M. (2010).	Betaines and Dimethylsulfoniopropionate as Major Osmolytes in Cnidaria with Endosymbiotic Dinoflagellates. Physiological and Biochemical Zoology, 83(1), 167–173. https://doi.org/10.1086/644625		x
570	Yang, S., Zhong, J., Zhao, L., Wu, H., Du, Z., Liu, Q., Zhang, J., Yan, T., & Huang, X. (2018).	The salinity tolerance of the invasive golden apple snail (Pomacea canaliculata). Molluscan Research, 38(2), 90–98. https://doi.org/10.1080/13235818.2017.1386260								x
571	Yaroslavtseva, L. M., & Sergeeva, E. P. (2009a).	Adaptation capacity of the larvae of marine invertebrates under variation of environmental parameters as a sensitive test of sea water pollution. Russian Journal of Marine Biology, 35(2), 127–131. https://doi.org/10.1134/S1063074009020035	x
572	Yaroslavtseva, L. M., & Sergeeva, E. P. (2009b).	Adaptation to reduced salinity in larvae of the mussel Crenomytilus grayanus from spring and summer spawnings. Russian Journal of Marine Biology, 35(4), 335–341. https://doi.org/10.1134/S1063074009040099	x
573	Yin, M., Palmer, H. R., Bedford, J. J., Fyfe-Johnson, A., Santoso, F., Suko, J., & Yancey, P. H. (1999).	Unusual osmolytes in deep-sea vestimentiferans, gastropods, and echinoderms. American Zoologist, 39, 65A-65A.						x
574	Yin, M., & Yancey, P. H. (2000).	Methylalamine osmolytes dominate in deep-sea polychaetes, pycnogonids, and octopods. American Zoologist, 40, 1269–1269.						x
575	Yin, M., Palmer, H. R., Fyfe‐Johnson, A. L., Bedford, J. J., Smith, R. A. J., & Yancey, P. H. (2000).	Hypotaurine, N‐Methyltaurine, Taurine, and Glycine Betaine as Dominant Osmolytes of Vestimentiferan Tubeworms from Hydrothermal Vents and Cold Seeps. Physiological and Biochemical Zoology, 73(5), 629–637. https://doi.org/10.1086/317749						x
576	Yin, Q., & Wang, W.-X. (2017).	Relating metals with major cations in oyster Crassostrea hongkongensis: A novel approach to calibrate metals against salinity. Science of The Total Environment, 577, 299–307. https://doi.org/10.1016/j.scitotenv.2016.10.185																	not quantitative
577	Yudkin, W. H. (1954).	Transphosphorylation in echinoderms. Journal of Cellular and Comparative Physiology, 44(3), 507–518. https://doi.org/10.1002/jcp.1030440310	x
578	Zanders, I. P., & Herrera, F. C. (1974).	Ionic distribution and fluxes in holothurian tissues. Comparative Biochemistry and Physiology Part A: Physiology, 47(4), 1153–1170. https://doi.org/10.1016/0300-9629(74)90090-5									x
579	Zatta, P., & Cervellin, D. (1987).	Hypo-Osmotic Stress in the Bivalve Mollusc Callista Chione (lam.). Monitore Zoologico Italiano - Italian Journal of Zoology, 21(4), 287–292. https://doi.org/10.1080/00269786.1987.10736532				x
580	Zebe, E., & Schiedek, D. (1996).	The lugworm Arenicola marina: A model of physiological adaptation to life in intertidal sediments. Helgoländer Meeresuntersuchungen, 50(1), 37. https://doi.org/10.1007/BF02367136						x		x	x
581	Zerbst-Boroffka, I., Grospietsch, T., Mekhanikova, I., & Takhteev, V. (2000).	Osmotic and ionic hemolymph concentrations of bathyal and abyssal amphipods of Lake Baikal (Siberia) in relation to water depth. Journal of Comparative Physiology B, 170(8), 615–625. https://doi.org/10.1007/s003600000142						x
582	Zerbst-Boroffka, Irene, Kamaltynow, R. M., Harjes, S., Kinne-Saffran, E., & Gross, J. (2005).	TMAO and other organic osmolytes in the muscles of amphipods (Crustacea) from shallow and deep water of Lake Baikal. Comparative Biochemistry and Physiology Part A: Molecular & Integrative Physiology, 142(1), 58–64. https://doi.org/10.1016/j.cbpa.2005.07.008						x
583	Zurburg, W., Kluytmans, J. H., Pieters, H., & Zandee, D. I. (1979).	The Influence of Seasonal Changes on Energy Metabolism in Mytilus edulis (L). II. Organ Specificity. In E. Naylor & R. G. Hartnoll (Hrsg.), Cyclic Phenomena in Marine Plants and Animals (S. 293–300). Pergamon. https://doi.org/10.1016/B978-0-08-023217-1.50044-8										x
584	Zurburg, W., & De Zwaan, A. (1981).	The role of amino acids in anaerobiosis and osmoregulation in bivalves. Journal of Experimental Zoology, 215(3), 315–325. https://doi.org/10.1002/jez.1402150309						x

## Sheet: ReferenceList_included
Table S2 - FILTERED REFERENCE LIST includes all studies that met the inclusion criteria after full-exam
Reference ID	Authors & Year	Title/Journal/ Pages/DOI
1	Allen, J. A., & Garrett, M. R. (1972).	Studies on taurine in the euryhaline bivalve Mya arenaria. Comparative Biochemistry and Physiology Part A: Physiology, 41(2), 307–317. https://doi.org/10.1016/0300-9629(72)90062-X
2	Amende, L. M., & Pierce, S. K. (1980a).	Cellular volume regulation in salinity stressed molluscs: The response of Noetia ponderosa (Arcidae) red blood cells to osmotic variation. Journal of comparative physiology, 138(4), 283–289.
3	Austin, H. L. (2007).	Effect of hypo-osmotic stress on pedal disk diameter, volume regulation and concentration of Mg (2+) in the sea anemone Metridium senile. Oregon Institute of Marine Biology.
4	Baginski, R. M., & Pierce, S. K. (1975).	Anaerobiosis: A possible source of osmotic solute for high-salinity acclimation in marine molluscs. Journal of Experimental Biology, 62(3), 589–598.
5	Benson-Rodenbough, B., & Ellington, W. R. (1982).	Responses of the euryhaline sea anemone bunodosoma cavernata (bosc) (anthozoa, actinaria, actiniidae) to osmotic stress. Comparative Biochemistry and Physiology Part A: Physiology, 72(4), 731–735. https://doi.org/10.1016/0300-9629(82)90157-8
6	Berger, V. Ya., Khlebovich, V. V., Kovaleva, N. M., & Natochin, Yu. V. (1978).	The changes of ionic composition and cell volume during adaptation of molluscs (Littorina) to lowered salinity. Comparative Biochemistry and Physiology Part A: Physiology, 60(4), 447–452. https://doi.org/10.1016/0300-9629(78)90015-4
7	Bishop, C. D., Lee, K. J., & Watts, S. A. (1994a).	A comparison of osmolality and specific ion concentrations in the fluid compartments of the regular sea urchin Lytechinus variegatus Lamarck (Echinodermata: Echinoidea) in varying salinities. Comparative Biochemistry and Physiology Part A: Physiology, 108(4), 497–502. https://doi.org/10.1016/0300-9629(94)90333-6
8	Bryan, G. W. (1963).	The accumulation of radioactive caesium by marine invertebrates. Journal of the Marine Biological Association of the United Kingdom, 43(2), 519–539.
9	Costa, C. J., & Pierce, S. K. (1983).	Volume regulation in the red coelomocytes ofGlycera dibranchiata: An interaction of amino acid and K+ effluxes. Journal of Comparative Physiology, 151(2), 133–144. https://doi.org/10.1007/BF00689911
10	Costa, C. J., Pierce, S. K., & Warren, M. K. (1980).	The intracellular mechanism of salinity tolerance in polychaetes: Volume regulation by isolated Glycera dibranchiata red coelomocytes. The Biological Bulletin, 159(3), 626–638.
11	De Vooys, C. G. N. (1991).	Anaerobic metabolism in sublittoral living Mytilus galloprovincialis in the mediterranean—IV. Role of amino acids in adaptation to low salinities during anaerobiosis and aerobiosis. Comparative Biochemistry and Physiology Part A: Physiology, 100(2), 423–431. https://doi.org/10.1016/0300-9629(91)90494-W
12	Deaton, Lewis E., & Hoffmann, R. J. (1988).	Hypoosmotic volume regulation in the sea anemone metridium senile. Comparative Biochemistry and Physiology Part C: Comparative Pharmacology, 91(1), 187–191. https://doi.org/10.1016/0742-8413(88)90185-5
13	Deaton, Lewis E. (1981).	Ion Regulation in Freshwater and Brackish Water Bivalve Mollusks. Physiological Zoology, 54(1), 109–121. https://doi.org/10.1086/physzool.54.1.30155809
14	Deaton, Lewis E., Derby, J. G., Subhedar, N., & Greenberg, M. J. (1989).	Osmoregulation and salinity tolerance in two species of bivalve mollusc: Limnoperna fortunei and Mytilopsis leucophaeta. Journal of Experimental Marine Biology and Ecology, 133(1–2), 67–79.
15	Deaton, L. E. (1992).	Osmoregulation and epithelial permeability in two euryhaline bivalve molluscs: Mya arenaria and Geukensia demissa. Journal of Experimental Marine Biology and Ecology, 158(2), 167–177. https://doi.org/10.1016/0022-0981(92)90224-X
16	Emerson, D. N. (1969).	Influence of salinity of ammonia excretion rates and tissue constituents of euryhaline invertebrates. Comparative Biochemistry and Physiology, 29(3), 1115–1133.
17	Gainey, L. F., & Greenberg, M. J. (1977).	Physiological basis of the species abundance-salinity relationship in molluscs: A speculation. Marine Biology, 40(1), 41–49. https://doi.org/10.1007/BF00390626
18	Gainey, Louis F. (1978b).	The Response of the Corbiculidae (Mollusca: Bivalvia) to Osmotic Stress: The Cellular Response. Physiological Zoology, 51(1), 79–91. https://doi.org/10.1086/physzool.51.1.30158667
19	Henry, R. P., Perry, H. M., Trigg, C. B., Handley, H. L., & Krarup, A. (1990).	Physiology of two species of deep-water crabs, Chaceon fenneri and C. quinquedens: Gill morphology, and hemolymph ionic and nitrogen concentrations. Journal of Crustacean Biology, 10(3), 375–381.
20	Hildreth, J. E., & Stickle, W. B. (1980).	The effects of temperature and salinity on the osmotic composition of the southern oyster drill, Thais haemastoma. The Biological Bulletin, 159(1), 148–161.
21	Hiong, K. C., Peh, W. Y. X., Loong, A. M., Wong, W. P., Chew, S. F., & Ip, Y. K. (2004).	Exposure to air, but not seawater, increases the glutamine content and the glutamine synthetase activity in the marsh clam Polymesoda expansa. Journal of Experimental Biology, 207(26), 4605–4614. https://doi.org/10.1242/jel.01334
22	Kapper, M., Stickle, W., & Blakeney, E. (1985).	Volume regulation and nitrogen metabolism in the muricid gastropod Thais haemastoma. The Biological bulletin, 169(2), 458–475.
23	Knight, P.-A., Loomis, S. H., & Fell, P. E. (1992).	The use of free amino acids for osmotic compensation by the euryhaline sponge Microciona prolifera (Ellis & Sollander). Journal of Experimental Marine Biology and Ecology, 163(1), 111–123. https://doi.org/10.1016/0022-0981(92)90150-9
24	Kube, S., Sokolowski, A., Jansen, J. M., & Schiedek, D. (2007).	Seasonal variability of free amino acids in two marine bivalves, Macoma balthica and Mytilus spp., in relation to environmental and physiological factors. Comparative Biochemistry and Physiology Part A: Molecular & Integrative Physiology, 147(4), 1015–1027. https://doi.org/10.1016/j.cbpa.2007.03.012
25	Lee, W.-C., & Chen, J.-C. (2003).	Hemolymph ammonia, urea and uric acid levels and nitrogenous excretion of Marsupenaeus japonicus at different salinity levels. Journal of Experimental Marine Biology and Ecology, 288(1), 39–49. https://doi.org/10.1016/S0022-0981(02)00597-X
26	Lin, C.-H., Yeh, P.-L., & Lee, T.-H. (2016).	Ionic and Amino Acid Regulation in Hard Clam (Meretrix lusoria) in Response to Salinity Challenges. Frontiers in Physiology, 7. https://doi.org/10.3389/fphys.2016.00368
27	Livingstone, D. R., Widdows, J., & Fieth, P. (1979).	Aspects of nitrogen metabolism of the common mussel Mytilus edulis: Adaptation to abrupt and fluctuating changes in salinity. Marine Biology, 53(1), 41–55.
28	Lucu, C., & Devescovi, M. (1999).	Osmoregulation and branchial Na+,K+-ATPase in the lobster Homarus gammarus acclimated to dilute seawater. Journal of Experimental Marine Biology and Ecology, 234(2), 291–304. https://doi.org/10.1016/S0022-0981(98)00152-X
29	Lucu, Č., Devescovi, M., Skaramuca, B., & Kožul, V. (2000).	Gill Na,K-ATPase in the spiny lobster Palinurus elephas and other marine osmoconformers: Adaptiveness of enzymes from osmoconformity to hyperregulation. Journal of Experimental Marine Biology and Ecology, 246(2), 163–178. https://doi.org/10.1016/S0022-0981(99)00179-3
30	Lynch, M. P., & Wood, L. (1966).	Effects of environmental salinity of free amino acids of Crassostrea virginica gmelin. Comparative Biochemistry and Physiology, 19(4), 783–790. https://doi.org/10.1016/0010-406X(66)90434-8
31	Natochin, Yu. V., Berger, V. Y., Khlebovich, V. V., Lavrova, E. A., & Michailova, O. Yu. (1978).	The participation of electrolytes in adaptation mechanisms of intertidal molluscs’ cells to altered salinity—ScienceDirect. Comp. Biochem. Physiol., 63A, 115–119.
32	Neufeld, D. S., & Wright, S. H. (1996a).	Response of cell volume in Mytilus gill to acute salinity change. Journal of Experimental Biology, 199(2), 473–484.
33	Neufeld, D. S., & Wright, S. H. (1996b).	Salinity change and cell volume: The response of tissues from the estuarine mussel Geukensia demissa. Journal of Experimental Biology, 199(7), 1619–1630.
34	Neufeld, D., & Wright, S. (1998).	Effect of cyclical salinity changes on cell volume and function in geukensia demissa gills. Journal of Experimental Biology, 201(9), 1421–1431.
35	Oglesby, Larry C. (1968).	Some osmotic responses of the sipunculid worm Themiste dyscritum. Comparative Biochemistry and Physiology, 26(1), 155–177. https://doi.org/10.1016/0010-406X(68)90323-X
36	Paynter, K. T., Pierce, S. K., & Burreson, E. M. (1995).	Levels of intracellular free amino acids used for salinity tolerance by oysters (Crassostrea virginica) are altered by protozoan (Perkinsus marinus) parasitism. Marine Biology, 122(1), 67–72. https://doi.org/10.1007/BF00349278
37	Pierce, Sidney K. (1970).	The water balance of Modiolus (Mollusca: Bivalvia: Mytilidae): Osmotic concentrations in changing salinities. Comparative Biochemistry and Physiology, 36(3), 521–533. https://doi.org/10.1016/0010-406X(70)91028-5
38	Pierce Jr., S. K. (1971a).	A source of solute for volume regulation in marine mussels. Comparative Biochemistry and Physiology Part A: Physiology, 38(3), 619–635. https://doi.org/10.1016/0300-9629(71)90129-0
39	Pierce, Sidney K., Warren, M. K., & West, H. H. (1983).	Non-Amino Acid Mediated Volume Regulation in an Extreme Osmoconformer. Physiological Zoology, 56(3), 445–454. https://doi.org/10.1086/physzool.56.3.30152610
40	Pierce, Sidney K., Edwards, S. C., Mazzocchi, P. H., Klingler, L. J., & Warren, M. K. (1984).	Proline betaine: A unique osmolyte in an extremely euryhaline osmoconformer. The Biological Bulletin, 167(2), 495–500. https://doi.org/10.2307/1541294
41	Pierce, S. K., Rowland-Faux, L. M., & O’Brien, S. M. (1992).	Different salinity tolerance mechanisms in Atlantic and Chesapeake Bay conspecific oysters: Glycine betaine and amino acid pool variations. Marine Biology, 113(1), 107–115. https://doi.org/10.1007/BF00367644
42	Podbielski, I., Bock, C., Lenz, M., & Melzner, F. (2016).	Using the critical salinity (S-crit) concept to predict invasion potential of the anemone Diadumene lineata in the Baltic Sea. Marine Biology, 163(11), 227. https://doi.org/10.1007/s00227-016-2989-5
43	Potts, W. T. W. (1958).	The Inorganic and Amino Acid Composition of Some Lamellibranch Muscles. Journal of Experimental Biology, 35(4), 749–764.
44	Ran, Z., Li, S., Zhang, R., Xu, J., Liao, K., Yu, X., Zhong, Y., Ye, M., Yu, S., Ran, Y., Huang, W., & Yan, X. (2017).	Proximate, amino acid and lipid compositions in Sinonovacula constricta (Lamarck) reared at different salinities. Journal of the Science of Food and Agriculture, 97(13), 4476–4483. https://doi.org/10.1002/jsfa.8311
45	Rola, R. C., Souza, M. M., & Sandrini, J. Z. (2017).	Hypoosmotic stress in the mussel Perna perna (Linnaeus, 1758): Is ecological history a determinant for organismal responses? Estuarine, Coastal and Shelf Science, 189, 216–223. https://doi.org/10.1016/j.ecss.2017.03.020
46	Rowland, L. M., & Pierce, S. K. (1985).	The utilization and fate of quaternary ammonium compounds during low salinity adaptation in Elysia chlorotica. Physiological zoology, 58(1), 149–157.
47	Sanders, T. (2018)	Bioenergetik der Kalzifizierung in Mytiliden Muscheln entlang des Salinitätsgradienten der Ostsee (Doctoral dissertation, Christian-Albrechts-Universität Kiel).
48	Schiedek, D. (1997).	Marenzelleria cf. viridis (Polychaeta: Spionidae) – ecophysiological adaptations to a life in the coastal waters of the Baltic Sea. Aquatic Ecology, 31(2), 199–210. https://doi.org/10.1023/A:1009907606161
49	Schiedek, D. (1998).	Ecophysiological capability of Marenzelleria populations inhabiting North Sea estuaries: An overview. Helgoländer Meeresuntersuchungen, 52(3), 373. https://doi.org/10.1007/BF02908911
50	Schmittmann, L. (2017).	Local adaptation of the common sea star Asterias rubens to different salinities (Master thesis, Christian-Albrechts-Universität Kiel).
51	Shumway, S. E. (1977a).	Effect of salinity fluctuation on the osmotic pressure and Na<Superscript>+</Superscript>, Ca<Superscript>2+</Superscript> and Mg<Superscript>2+</Superscript> ion concentrations in the hemolymph of bivalve molluscs. Marine Biology, 41(2), 153–177. https://doi.org/10.1007/BF00394023
52	Silva, A. L. (1992).	Effect of salinity on integumental transport in marine bivalves.
53	Stickle, W. B., Kapper, M. A., Blakeney, E., & Bayne, B. L. (1985).	Effects of salinity on the nitrogen metabolism of the muricid gastropod, Thais (Nucella) lapillus (L.) (Mollusca: Prosobranchia). Journal of Experimental Marine Biology and Ecology, 91(1), 1–16. https://doi.org/10.1016/0022-0981(85)90217-5
54	Stucchi-Zucchi, A., & C. Salomão, L. (1998).	The ionic basis of membrane potentials and adaptation to hyposmotic stress in Perna perna, an osmoconforming mollusc. Comparative Biochemistry and Physiology Part A: Molecular & Integrative Physiology, 121(2), 143–148. https://doi.org/10.1016/S1095-6433(98)10115-0
55	Willmer, P. G. (1978a).	Volume Regulation and Solute Balance in the Nervous Tissue of an Osmoconforming Bivalve (Mytilus Edulis). Journal of Experimental Biology, 77(1), 157–179.
56	Witteveen, J., Verhoef, H. A., & Letschert, J. P. W. (1987).	Osmotic and ionic regulation in marine littoral Collembola. Journal of Insect Physiology, 33(1), 59–66. https://doi.org/10.1016/0022-1910(87)90105-3

## Sheet: Included_Study_Details
Table S2 - List of experimental study details of all included studies and their included datasets. Data only reported if full data (replication, mean, variation) given.
ID	Title	System Type	Experimental Duration (days)	ΔS	S low	S high	Settings	Water source	Biogeographic Region	Taxa	Class	Species	Physiotype	Body fluid/Tissue Type	Medium category	# Species used in study	Treatment level	Replication (n) Low Sal	Replication (n) High Salinity	Experimental Design	Crossed Manipulation 1	Crossed Manipulation 2	Outcome	Mean (Low Salinity)	Variance (Low Salinity)	Mean (High Sal)	Variance (High Sal)	Variance type	ECS_included	Adjustment to experimental salinity	Notes
1	Allen & Garret 1972	marine	27	22	12	34	Experiment	unknown	unknown	Mollusca	Bivalvia	Mya arenaria	euryhaline	whole-body	tissue	1	2	16	15	Control-Impacted (CI)	Temperature		Taurine	6.06906	2.03742	5.5132	3.09747	Standard Deviation	No	unknown	Lowest Salinity treatment not used, because only 1 datapoint // Means calculated from raw data // 16°C treatment used
2	Amende & Pierce 1980	marine	56	24	11.9	35.9	Experiment	artificial	Chincoteague Bay, Maryland US	Mollusca	Bivalvia	Noetia ponderosa	euryhaline	blood plasma	body fluid	1	7	10	10	Regression			Total Osmolality	457.2	31.6228	863.6	31.6228	Standard Error	No	acute	Control taken 100%SW (840mOsm); study list 790mOsm treatment as control, but no values available for control treatment; SE smaller than point symbols (<10 mOsm)
3	Austin 2007	marine	21	16.5	16.5	33	Experiment	natural	Charleston Harbor, Oregon	Cnidaria	Anthozoa	Metridium senile	euryhaline	Tissue	tissue	1	3	3	3	Control-Impacted (CI)			Magnesium	116	62	332.5	15	Standard Deviation	No	acute
4	Baginski & Pierce 1975	marine	21	24	12	36	Experiment	artificial	Assateague Island, Maryland, USA	Mollusca	Bivalvia	Geukensia demissa	euryhaline	ventricle	tissue	1	2	5	5	Before-After (BA)			Alanine	43	15.2053	175	60.3738	Standard Error	yes	unknown
5	Baginski & Pierce 1975	marine	21	24	12	36	Experiment	artificial	Assateague Island, Maryland, USA	Mollusca	Bivalvia	Geukensia demissa	euryhaline	ventricle	tissue	1	2	5	5	Before-After (BA)			Aspartate	54	15.4289	42	12.2984	Standard Error	yes	unknown
6	Baginski & Pierce 1975	marine	21	24	12	36	Experiment	artificial	Assateague Island, Maryland, USA	Mollusca	Bivalvia	Geukensia demissa	euryhaline	ventricle	tissue	1	2	5	5	Before-After (BA)			Glutamate	35	7.60263	33	6.26099	Standard Error	yes	unknown
7	Baginski & Pierce 1975	marine	21	24	12	36	Experiment	artificial	Assateague Island, Maryland, USA	Mollusca	Bivalvia	Geukensia demissa	euryhaline	ventricle	tissue	1	2	5	5	Before-After (BA)			Glycine	64	12.0748	250	13.4164	Standard Error	yes	unknown
8	Baginski & Pierce 1975	marine	21	24	12	36	Experiment	artificial	Assateague Island, Maryland, USA	Mollusca	Bivalvia	Geukensia demissa	euryhaline	ventricle	tissue	1	2	5	5	Before-After (BA)			Proline	0	0	0	0	Standard Error	yes	unknown
9	Baginski & Pierce 1975	marine	21	24	12	36	Experiment	artificial	Assateague Island, Maryland, USA	Mollusca	Bivalvia	Geukensia demissa	euryhaline	ventricle	tissue	1	2	5	5	Before-After (BA)			Serine	6	0.894427	2	0.223607	Standard Error	yes	unknown
10	Baginski & Pierce 1975	marine	21	24	12	36	Experiment	artificial	Assateague Island, Maryland, USA	Mollusca	Bivalvia	Geukensia demissa	euryhaline	ventricle	tissue	1	2	5	5	Before-After (BA)			Taurine	77	6.26099	241	6.26099	Standard Error	yes	unknown
11	Baginski & Pierce 1975	marine	21	24	12	36	Experiment	artificial	Assateague Island, Maryland, USA	Mollusca	Bivalvia	Geukensia demissa	euryhaline	ventricle	tissue	1	2	5	5	Before-After (BA)			Threonine	4	0.67082	3	0.447214	Standard Error	yes	unknown
12	Baginski & Pierce 1975	marine	21	24	12	36	Experiment	artificial	Assateague Island, Maryland, USA	Mollusca	Bivalvia	Geukensia demissa	euryhaline	ventricle	tissue	1	2	5	5	Before-After (BA)			Total Organics	283	42.9325	753	64.1752	Standard Error	yes	unknown
13	Benson-Rodenbough & Ellington 1982	marine	21	30			Experiment	artificial	Port Arkansas, Texas, USA	Cnidaria	Anthozoa	Bunodosoma cavernata	euryhaline	coelenteron fluid	body fluid	1	7	5	5	Control-Impacted (CI)			Total Organics	51.13	2.23607	122.1	31.305	Standard Error	No	acute
14	Berger et al. 1978	marine	14	9.2	16	26.8	Experiment	natural	Kandalaksha Bay , White Sea	Mollusca	Gastropoda	Littorina littorea	euryhaline	foot muscle	tissue	1	2	8	8	Before-After (BA)			Magnesium	235	41.0122	281	20.9304	Standard Error	Yes	unknown	Replicate size 8 - 10 // total tissue used because no SD for cellular conc. available
15	Berger et al. 1978	marine	14	9.2	16	26.8	Experiment	natural	Kandalaksha Bay , White Sea	Mollusca	Gastropoda	Littorina littorea	euryhaline	hepatopancreas	tissue	1	2	8	8	Before-After (BA)			Magnesium	183	17.8191	156	7.63675	Standard Error	Yes	unknown	Replicate size 8 - 10 // total tissue used because no SD for cellular conc. available
16	Berger et al. 1978	marine	14	9.2	16	26.8	Experiment	natural	Kandalaksha Bay , White Sea	Mollusca	Gastropoda	Littorina littorea	euryhaline	foot muscle	tissue	1	2	8	8	Before-After (BA)			Potassium	351	47.5176	358	28.5671	Standard Error	Yes	unknown	Replicate size 8 - 10 // total tissue used because no SD for cellular conc. available
17	Berger et al. 1978	marine	14	9.2	16	26.8	Experiment	natural	Kandalaksha Bay , White Sea	Mollusca	Gastropoda	Littorina littorea	euryhaline	hepatopancreas	tissue	1	2	8	8	Before-After (BA)			Potassium	154	22.6274	151	9.61665	Standard Error	Yes	unknown	Replicate size 8 - 10 // total tissue used because no SD for cellular conc. available
18	Berger et al. 1978	marine	14	9.2	16	26.8	Experiment	natural	Kandalaksha Bay , White Sea	Mollusca	Gastropoda	Littorina littorea	euryhaline	foot muscle	tissue	1	2	8	8	Before-After (BA)			Sodium	356	26.5872	472	28.0014	Standard Error	Yes	unknown	Replicate size 8 - 10 // total tissue used because no SD for cellular conc. available
19	Berger et al. 1978	marine	14	9.2	16	26.8	Experiment	natural	Kandalaksha Bay , White Sea	Mollusca	Gastropoda	Littorina littorea	euryhaline	hepatopancreas	tissue	1	2	8	8	Before-After (BA)			Sodium	407	36.2039	401	31.6784	Standard Error	Yes	unknown	Replicate size 8 - 10 // total tissue used because no SD for cellular conc. available
20	Bishop et al. 1994a	marine	32	10	20	30	Experiment	artificial	Port Saint Joe, Florida, USA	Echinodermata	Echinoidea	Lytechinus variegatus	stenohaline	coelomic fluid	body fluid	1	4	10	10	Control-Impacted (CI)			Chloride	259.5	41.1096	405.5	15.8114	Standard Error	No	gradual
21	Bishop et al. 1994a	marine	32	10	20	30	Experiment	artificial	Port Saint Joe, Florida, USA	Echinodermata	Echinoidea	Lytechinus variegatus	stenohaline	Intestine (lumenal fluid)	body fluid	1	4	10	10	Control-Impacted (CI)			Chloride	285.9	12.6491	452.5	15.8114	Standard Error	No	gradual (5ppt/day)
22	Bishop et al. 1994a	marine	32	10	20	30	Experiment	artificial	Port Saint Joe, Florida, USA	Echinodermata	Echinoidea	Lytechinus variegatus	stenohaline	Stomach (lumenal fluid)	body fluid	1	4	10	10	Control-Impacted (CI)			Chloride	301.5	12.6491	459.1	12.6491	Standard Error	No	gradual (5ppt/day)
23	Bishop et al. 1994a	marine	32	10	20	30	Experiment	artificial	Port Saint Joe, Florida, USA	Echinodermata	Echinoidea	Lytechinus variegatus	stenohaline	coelomic fluid	body fluid	1	4	10	10	Control-Impacted (CI)			Potassium	4.224	0.316228	6.821	0.316228	Standard Error	No	gradual (5ppt/day)
24	Bishop et al. 1994a	marine	32	10	20	30	Experiment	artificial	Port Saint Joe, Florida, USA	Echinodermata	Echinoidea	Lytechinus variegatus	stenohaline	Intestine (lumenal fluid)	body fluid	1	4	10	10	Control-Impacted (CI)			Potassium	8.045	1.26491	8.459	0.316228	Standard Error	No	gradual (5ppt/day)
25	Bishop et al. 1994a	marine	32	10	20	30	Experiment	artificial	Port Saint Joe, Florida, USA	Echinodermata	Echinoidea	Lytechinus variegatus	stenohaline	Stomach (lumenal fluid)	body fluid	1	4	10	10	Control-Impacted (CI)			Potassium	6.162	0.632456	7.932	0.316228	Standard Error	No	gradual (5ppt/day)
26	Bishop et al. 1994a	marine	32	10	20	30	Experiment	artificial	Port Saint Joe, Florida, USA	Echinodermata	Echinoidea	Lytechinus variegatus	stenohaline	coelomic fluid	body fluid	1	4	10	10	Control-Impacted (CI)			Sodium	187.2	3.16228	322.3	28.4605	Standard Error	No	gradual (5ppt/day)
27	Bishop et al. 1994a	marine	32	10	20	30	Experiment	artificial	Port Saint Joe, Florida, USA	Echinodermata	Echinoidea	Lytechinus variegatus	stenohaline	Intestine (lumenal fluid)	body fluid	1	4	10	10	Control-Impacted (CI)			Sodium	231.4	25.2982	341.9	18.9737	Standard Error	No	gradual (5ppt/day)
28	Bishop et al. 1994a	marine	32	10	20	30	Experiment	artificial	Port Saint Joe, Florida, USA	Echinodermata	Echinoidea	Lytechinus variegatus	stenohaline	Stomach (lumenal fluid)	body fluid	1	4	10	10	Control-Impacted (CI)			Sodium	230.6	34.7851	350.1	15.8114	Standard Error	No	gradual (5ppt/day)
29	Bishop et al. 1994a	marine	32	10	20	30	Experiment	artificial	Port Saint Joe, Florida, USA	Echinodermata	Echinoidea	Lytechinus variegatus	stenohaline	coelomic fluid	body fluid	1	4	10	10	Control-Impacted (CI)			Total Osmolality	603.8	12.6491	873.8	12.6491	Standard Error	No	gradual (5ppt/day)
30	Bishop et al. 1994a	marine	32	10	20	30	Experiment	artificial	Port Saint Joe, Florida, USA	Echinodermata	Echinoidea	Lytechinus variegatus	stenohaline	Intestine (lumenal fluid)	body fluid	1	4	10	10	Control-Impacted (CI)			Total Osmolality	603.8	12.6491	873.8	12.6491	Standard Error	No	gradual (5ppt/day)
31	Bishop et al. 1994a	marine	32	10	20	30	Experiment	artificial	Port Saint Joe, Florida, USA	Echinodermata	Echinoidea	Lytechinus variegatus	stenohaline	Stomach (lumenal fluid)	body fluid	1	4	10	10	Control-Impacted (CI)			Total Osmolality	603.8	12.6491	870	12.6491	Standard Error	No	gradual (5ppt/day)
32	Bryan 1963	marine	28	2.9	24	26.9	Experiment	natural	Plymouth, UK	Cnidaria	anthozoa	Actinia equina	stenohaline	whole animal	tissue	1	2	2	2	Control-Impacted (CI)			Potassium	71.5	2.12132	52	11.3137	Standard Deviation	No	unknown
33	Costa & Pierce 1983	marine	14	16	16	32	Experiment	artificial	purchased	Annelida	Polychaeta	Glycera dibranchiata	euryhaline	coelomocytes	tissue	1	3	11	10	Control-Impacted (CI)			Potassium	154	14.9248	200	14.8627	Standard Error	yes	acute
34	Costa et al. 1980	marine	14	17	15	32	Experiment	artificial	purchased, Maine, USA	Annelida	Polychaeta	Glycera dibranchiata	euryhaline	coelomocytes	tissue	1	3	5	5	Control-Impacted (CI)			Alanine	16.97	34.2118	151.2	51.4296	Standard Error	No	gradual (2.6-9.6/48hrs)
35	Costa et al. 1980	marine	14	20	12	32	Experiment	artificial	purchased, Maine, USA	Annelida	Polychaeta	Glycera dibranchiata	euryhaline	body wall	tissue	1	4	5	5	Control-Impacted (CI)			Alanine	9.812	17.8885	102.2	38.0132	Standard Error	No	gradual (2.6-9.6/48hrs)
36	Costa et al. 1980	marine	14	17	15	32	Experiment	artificial	purchased, Maine, USA	Annelida	Polychaeta	Glycera dibranchiata	euryhaline	coelomocytes	tissue	1	3	5	5	Control-Impacted (CI)			Asparagine	72.86	40.2492	242.5	42.4853	Standard Error	No	gradual (2.6-9.6/48hrs)
37	Costa et al. 1980	marine	14	20	12	32	Experiment	artificial	purchased, Maine, USA	Annelida	Polychaeta	Glycera dibranchiata	euryhaline	body wall	tissue	1	4	5	5	Control-Impacted (CI)			Asparagine	86.01	20.1246	107.1	24.5967	Standard Error	No	gradual (2.6-9.6/48hrs)
38	Costa et al. 1980	marine	14	17	15	32	Experiment	artificial	purchased, Maine, USA	Annelida	Polychaeta	Glycera dibranchiata	euryhaline	coelomocytes	tissue	1	3	5	5	Control-Impacted (CI)			Glutamine	0	0	0	0	Standard Error	No	gradual (2.6-9.6/48hrs)
39	Costa et al. 1980	marine	14	20	12	32	Experiment	artificial	purchased, Maine, USA	Annelida	Polychaeta	Glycera dibranchiata	euryhaline	body wall	tissue	1	4	5	5	Control-Impacted (CI)			Glutamine	22.1	31.305	82.08	31.305	Standard Error	No	gradual (2.6-9.6/48hrs)
40	Costa et al. 1980	marine	14	17	15	32	Experiment	artificial	purchased, Maine, USA	Annelida	Polychaeta	Glycera dibranchiata	euryhaline	coelomocytes	tissue	1	3	5	5	Control-Impacted (CI)			Proline	0	0	0	0	Standard Error	No	gradual (2.6-9.6/48hrs)
41	Costa et al. 1980	marine	14	20	12	32	Experiment	artificial	purchased, Maine, USA	Annelida	Polychaeta	Glycera dibranchiata	euryhaline	body wall	tissue	1	4	5	5	Control-Impacted (CI)			Proline	14.73	26.8328	168.1	42.4853	Standard Error	No	gradual (2.6-9.6/48hrs)
42	Costa et al. 1980	marine	14	17	15	32	Experiment	artificial	purchased, Maine, USA	Annelida	Polychaeta	Glycera dibranchiata	euryhaline	coelomocytes	tissue	1	3	5	5	Control-Impacted (CI)			Serine	10.49	11.1803	139.7	22.3607	Standard Error	No	gradual (2.6-9.6/48hrs)
43	Costa et al. 1980	marine	14	20	12	32	Experiment	artificial	purchased, Maine, USA	Annelida	Polychaeta	Glycera dibranchiata	euryhaline	body wall	tissue	1	4	5	5	Control-Impacted (CI)			Serine	4.896	4.47214	34.39	15.6525	Standard Error	No	gradual (2.6-9.6/48hrs)
44	Costa et al. 1980	marine	14	17	15	32	Experiment	artificial	purchased, Maine, USA	Annelida	Polychaeta	Glycera dibranchiata	euryhaline	coelomocytes	tissue	1	3	5	5	Control-Impacted (CI)			Taurine	0	0	0	0	Standard Error	No	gradual (2.6-9.6/48hrs)
45	Costa et al. 1980	marine	14	20	12	32	Experiment	artificial	purchased, Maine, USA	Annelida	Polychaeta	Glycera dibranchiata	euryhaline	body wall	tissue	1	4	5	5	Control-Impacted (CI)			Taurine	118.9	69.3181	229.6	71.5542	Standard Error	No	gradual (2.6-9.6/48hrs)
46	Costa et al. 1980	marine	14	17	15	32	Experiment	artificial	purchased, Maine, USA	Annelida	Polychaeta	Glycera dibranchiata	euryhaline	coelomocytes	tissue	1	3	5	5	Control-Impacted (CI)			Threonine	27.95	17.8885	78.35	20.1246	Standard Error	No	gradual (2.6-9.6/48hrs)
47	Costa et al. 1980	marine	14	20	12	32	Experiment	artificial	purchased, Maine, USA	Annelida	Polychaeta	Glycera dibranchiata	euryhaline	body wall	tissue	1	4	5	5	Control-Impacted (CI)			Threonine	0	0	0	0	Standard Error	No	gradual (2.6-9.6/48hrs)
48	De Vooys 1991	marine	14	19	19	38	Experiment	natural	Bay of Naples, Italy	Mollusca	Bivalvia	Mytilus galloprovincialis	euryhaline	adductor muscle	tissue	1	2	2	2	Before-After (BA)			Alanine	12	2.82843	53	16.9706	Standard Error	No	acute
49	De Vooys 1991	marine	14	19	19	38	Experiment	natural	Bay of Naples, Italy	Mollusca	Bivalvia	Mytilus galloprovincialis	euryhaline	gills	tissue	1	2	2	2	Before-After (BA)			Alanine	3.501	1.41421	2.63322	1.41421	Standard Error	No	acute
50	De Vooys 1991	marine	14	19	19	38	Experiment	natural	Bay of Naples, Italy	Mollusca	Bivalvia	Mytilus galloprovincialis	euryhaline	adductor muscle	tissue	1	2	2	2	Before-After (BA)			Aspartate	28	2.82843	26	5.65685	Standard Error	No	acute
51	De Vooys 1991	marine	14	19	19	38	Experiment	natural	Bay of Naples, Italy	Mollusca	Bivalvia	Mytilus galloprovincialis	euryhaline	gills	tissue	1	2	2	2	Before-After (BA)			Aspartate	16.48	2.82843	17.2343	1.41421	Standard Error	No	acute
52	De Vooys 1991	marine	14	19	19	38	Experiment	natural	Bay of Naples, Italy	Mollusca	Bivalvia	Mytilus galloprovincialis	euryhaline	adductor muscle	tissue	1	2	2	2	Before-After (BA)			Glutamate	11.69	0	22.5377	4.24264	Standard Error	No	acute
53	De Vooys 1991	marine	14	19	19	38	Experiment	natural	Bay of Naples, Italy	Mollusca	Bivalvia	Mytilus galloprovincialis	euryhaline	gills	tissue	1	2	2	2	Before-After (BA)			Glutamate	6.435	0.848528	5.11597	1.13137	Standard Error	No	acute
54	De Vooys 1991	marine	14	19	19	38	Experiment	natural	Bay of Naples, Italy	Mollusca	Bivalvia	Mytilus galloprovincialis	euryhaline	adductor muscle	tissue	1	2	2	2	Before-After (BA)			Glutamine	2.358	0.282843	6.63317	0.424264	Standard Error	No	acute
55	De Vooys 1991	marine	14	19	19	38	Experiment	natural	Bay of Naples, Italy	Mollusca	Bivalvia	Mytilus galloprovincialis	euryhaline	gills	tissue	1	2	2	2	Before-After (BA)			Glutamine	1.114	0	0	0	Standard Error	No	acute
56	De Vooys 1991	marine	14	19	19	38	Experiment	natural	Bay of Naples, Italy	Mollusca	Bivalvia	Mytilus galloprovincialis	euryhaline	adductor muscle	tissue	1	2	2	2	Before-After (BA)			Glycine	15	7.07107	148	24.0416	Standard Error	No	acute
57	De Vooys 1991	marine	14	19	19	38	Experiment	natural	Bay of Naples, Italy	Mollusca	Bivalvia	Mytilus galloprovincialis	euryhaline	gills	tissue	1	2	2	2	Before-After (BA)			Glycine	3.501	1.41421	13.8269	1.41421	Standard Error	No	acute
58	De Vooys 1991	marine	14	19	19	38	Experiment	natural	Bay of Naples, Italy	Mollusca	Bivalvia	Mytilus galloprovincialis	euryhaline	adductor muscle	tissue	1	2	2	2	Before-After (BA)			Serine	3.241	0.424264	10.4774	0.707107	Standard Error	No	acute
59	De Vooys 1991	marine	14	19	19	38	Experiment	natural	Bay of Naples, Italy	Mollusca	Bivalvia	Mytilus galloprovincialis	euryhaline	gills	tissue	1	2	2	2	Before-After (BA)			Serine	1.432	0.141421	0.827133	0.282843	Standard Error	No	acute
60	De Vooys 1991	marine	14	19	19	38	Experiment	natural	Bay of Naples, Italy	Mollusca	Bivalvia	Mytilus galloprovincialis	euryhaline	adductor muscle	tissue	1	2	2	2	Before-After (BA)			Taurine	218	4.24264	206	60.8112	Standard Error	No	acute
61	De Vooys 1991	marine	14	19	19	38	Experiment	natural	Bay of Naples, Italy	Mollusca	Bivalvia	Mytilus galloprovincialis	euryhaline	gills	tissue	1	2	2	2	Before-After (BA)			Taurine	108.2	2.82843	115.423	1.41421	Standard Error	No	acute
62	De Vooys 1991	marine	14	19	19	38	Experiment	natural	Bay of Naples, Italy	Mollusca	Bivalvia	Mytilus galloprovincialis	euryhaline	adductor muscle	tissue	1	2	2	2	Before-After (BA)			Threonine	1.585	0.424264	2.78894	0.282843	Standard Error	No	acute
63	De Vooys 1991	marine	14	19	19	38	Experiment	natural	Bay of Naples, Italy	Mollusca	Bivalvia	Mytilus galloprovincialis	euryhaline	gills	tissue	1	2	2	2	Before-After (BA)			Threonine	1.114	0	0.398249	0.141421	Standard Error	No	acute
64	Deaton & Hoffmann 1988	marine	14	14	17	31	Experiment	natural	Vineyard Sound, Massachusetts, USA	Cnidaria	Anthozoa	Metridium senile	euryhaline	whole-body	tissue	1	4	4	4	Control-Impacted (CI)			Alanine	10.2	5.3	17.9	4.6	Standard Deviation	No	acute
65	Deaton & Hoffmann 1988	marine	14	14	17	31	Experiment	natural	Vineyard Sound, Massachusetts, USA	Cnidaria	Anthozoa	Metridium senile	euryhaline	whole-body	tissue	1	4	4	4	Control-Impacted (CI)			Glutamate	17.6	6.2	16.6	3.5	Standard Deviation	No	acute
66	Deaton & Hoffmann 1988	marine	14	14	17	31	Experiment	natural	Vineyard Sound, Massachusetts, USA	Cnidaria	Anthozoa	Metridium senile	euryhaline	whole-body	tissue	1	4	4	4	Control-Impacted (CI)			Glycine	4.4	2.2	23.1	10.4	Standard Deviation	No	acute
67	Deaton & Hoffmann 1988	marine	14	14	17	31	Experiment	natural	Vineyard Sound, Massachusetts, USA	Cnidaria	Anthozoa	Metridium senile	euryhaline	whole-body	tissue	1	4	4	4	Control-Impacted (CI)			Serine	1	1.3	2.1	0.3	Standard Deviation	No	acute
68	Deaton & Hoffmann 1988	marine	14	14	17	31	Experiment	natural	Vineyard Sound, Massachusetts, USA	Cnidaria	Anthozoa	Metridium senile	euryhaline	whole-body	tissue	1	4	4	4	Control-Impacted (CI)			Taurine	202.8	17.3	369.7	56.2	Standard Deviation	No	acute
69	Deaton & Hoffmann 1988	marine	14	14	17	31	Experiment	natural	Vineyard Sound, Massachusetts, USA	Cnidaria	Anthozoa	Metridium senile	euryhaline	whole-body	tissue	1	4	4	4	Control-Impacted (CI)			Total Organics	250.7	34.2	444.4	48.3	Standard Deviation	No	acute
70	Deaton & Hoffmann 1988	marine	14	14	17	31	Experiment	natural	Vineyard Sound, Massachusetts, USA	Cnidaria	Anthozoa	Metridium senile	euryhaline	whole-body	tissue	1	4	4	4	Control-Impacted (CI)			Valine	3.5	3	5.5	3.8	Standard Deviation	No	acute
71	Deaton 1981	marine	28	21	2.2	23.2	Experiment	natural	Miraflores Third Locks Lake in the Panama Canal Zone, Panama	Mollusca	Bivalvia	Ostrea palmula	euryhaline	blood	body fluid	6	6	8	8	Control-Impacted (CI)			Bicarbonate	2.214	0.2	0.9333	0.2	Standard Deviation	No	unknown	regression design, but no statistical outcomes reported, thus means taken from graph data
72	Deaton 1981	marine	28	21	2.2	23.2	Experiment	natural	Miraflores Third Locks Lake in the Panama Canal Zone, Panama	Mollusca	Bivalvia	Ostrea palmula	euryhaline	blood	body fluid	6	6	8	8	Control-Impacted (CI)			Calcium	2.917	0.1	12.07	0.1	Standard Deviation	No	unknown	regression design, but no statistical outcomes reported, thus means taken from graph data
73	Deaton 1981	marine	28	21	2.2	23.2	Experiment	natural	Miraflores Third Locks Lake in the Panama Canal Zone, Panama	Mollusca	Bivalvia	Ostrea palmula	euryhaline	blood	body fluid	6	6	8	8	Control-Impacted (CI)			Chloride	40.58	8	565.3	8	Standard Deviation	No	unknown	regression design, but no statistical outcomes reported, thus means taken from graph data
74	Deaton 1981	marine	28	21	2.2	23.2	Experiment	natural	Miraflores Third Locks Lake in the Panama Canal Zone, Panama	Mollusca	Bivalvia	Ostrea palmula	euryhaline	blood	body fluid	6	6	8	8	Control-Impacted (CI)			Potassium	0.9589	0.1	10.16	0.1	Standard Deviation	No	unknown	regression design, but no statistical outcomes reported, thus means taken from graph data
75	Deaton 1981	marine	28	21	2.2	23.2	Experiment	natural	Miraflores Third Locks Lake in the Panama Canal Zone, Panama	Mollusca	Bivalvia	Ostrea palmula	euryhaline	blood	body fluid	6	6	8	8	Control-Impacted (CI)			Sodium	30.19	8	306.3	8	Standard Deviation	No	unknown	regression design, but no statistical outcomes reported, thus means taken from graph data
76	Deaton 1981	marine	28	21	2.2	23.2	Experiment	natural	Miraflores Third Locks Lake in the Panama Canal Zone, Panama	Mollusca	Bivalvia	Ostrea palmula	euryhaline	blood	body fluid	6	6	8	8	Control-Impacted (CI)			Total Osmolality	60.0858	11	819.742	11	Standard Deviation	No	unknown	regression design, but no statistical outcomes reported, thus means taken from graph data
77	Deaton 1981	estuarine	28	35	0	35	Experiment	natural	Ochlockonee Bay, Florida	Mollusca	Bivalvia	Polymesoda caroliniana	oligohaline	blood	body fluid	6	9	8	8	Control-Impacted (CI)			Bicarbonate	1.904	0.1	1.932	0.1	Standard Deviation	No	unknown	no control - lowest treatment = habitat salinity (2 PSU) // regression design, but no statistical outcomes reported, thus means taken from graph data
78	Deaton 1981	estuarine	28	35	0	35	Experiment	natural	Ochlockonee Bay, Florida	Mollusca	Bivalvia	Polymesoda caroliniana	oligohaline	blood	body fluid	6	9	8	8	Control-Impacted (CI)			Calcium	7.596	0.3	10.46	0.4	Standard Deviation	No	unknown	no control - lowest treatment = habitat salinity (2 PSU) // regression design, but no statistical outcomes reported, thus means taken from graph data
79	Deaton 1981	estuarine	28	35	0	35	Experiment	natural	Ochlockonee Bay, Florida	Mollusca	Bivalvia	Polymesoda caroliniana	oligohaline	blood	body fluid	6	9	8	8	Control-Impacted (CI)			Chloride	15.59	1	436.2	5	Standard Deviation	No	unknown	no control - lowest treatment = habitat salinity (2 PSU) // regression design, but no statistical outcomes reported, thus means taken from graph data
80	Deaton 1981	estuarine	28	35	0	35	Experiment	natural	Ochlockonee Bay, Florida	Mollusca	Bivalvia	Polymesoda caroliniana	oligohaline	blood	body fluid	6	9	8	8	Control-Impacted (CI)			Potassium	0.02555	0.1	11.48	0.4	Standard Deviation	No	unknown	no control - lowest treatment = habitat salinity (2 PSU) // regression design, but no statistical outcomes reported, thus means taken from graph data
81	Deaton 1981	estuarine	28	35	0	35	Experiment	natural	Ochlockonee Bay, Florida	Mollusca	Bivalvia	Polymesoda caroliniana	oligohaline	blood	body fluid	6	9	8	8	Control-Impacted (CI)			Sodium	18.2	3	514.2	5	Standard Deviation	No	unknown	no control - lowest treatment = habitat salinity (2 PSU) // regression design, but no statistical outcomes reported, thus means taken from graph data
82	Deaton 1981	estuarine	28	35	0	35	Experiment	natural	Ochlockonee Bay, Florida	Mollusca	Bivalvia	Polymesoda caroliniana	oligohaline	blood	body fluid	6	7	8	8	Control-Impacted (CI)			Total Osmolality	46.76	2	1008	14	Standard Deviation	No	unknown	no control - lowest treatment = habitat salinity (2 PSU) // regression design, but no statistical outcomes reported, thus means taken from graph data
83	Deaton 1981	marine	28	26.6179	2.2	28.8	Experiment	natural	Saltmarsh Wakulla County, Florida	Mollusca	Bivalvia	Polymesoda maritima	euryhaline	blood	body fluid	6	6	8	8	Control-Impacted (CI)			Bicarbonate	2.214	0.2	0.9333	0.2	Standard Deviation	No	unknown	regression design, but no statistical outcomes reported, thus means taken from graph data
84	Deaton 1981	marine	28	26.6179	2.2	28.8	Experiment	natural	Saltmarsh Wakulla County, Florida	Mollusca	Bivalvia	Polymesoda maritima	euryhaline	blood	body fluid	6	6	8	8	Control-Impacted (CI)			Calcium	2.917	0.1	12.07	1.5	Standard Deviation	No	unknown	regression design, but no statistical outcomes reported, thus means taken from graph data
85	Deaton 1981	marine	28	26.6179	2.2	28.8	Experiment	natural	Saltmarsh Wakulla County, Florida	Mollusca	Bivalvia	Polymesoda maritima	euryhaline	blood	body fluid	6	6	8	8	Control-Impacted (CI)			Chloride	40.58	8	565.3	8	Standard Deviation	No	unknown	regression design, but no statistical outcomes reported, thus means taken from graph data
86	Deaton 1981	marine	28	26.6179	2.2	28.8	Experiment	natural	Saltmarsh Wakulla County, Florida	Mollusca	Bivalvia	Polymesoda maritima	euryhaline	blood	body fluid	6	6	8	8	Control-Impacted (CI)			Potassium	0.9589	0.1	10.16	0.1	Standard Deviation	No	unknown	regression design, but no statistical outcomes reported, thus means taken from graph data
87	Deaton 1981	marine	28	26.6179	2.2	28.8	Experiment	natural	Saltmarsh Wakulla County, Florida	Mollusca	Bivalvia	Polymesoda maritima	euryhaline	blood	body fluid	6	6	8	8	Control-Impacted (CI)			Sodium	21.99	8	468.3	8	Standard Deviation	No	unknown	regression design, but no statistical outcomes reported, thus means taken from graph data
88	Deaton 1981	marine	28	26.6179	2.2	28.8	Experiment	natural	Saltmarsh Wakulla County, Florida	Mollusca	Bivalvia	Polymesoda maritima	euryhaline	blood	body fluid	6	6	8	8	Control-Impacted (CI)			Total Osmolality	89.87	11	1005	11	Standard Deviation	No	unknown	regression design, but no statistical outcomes reported, thus means taken from graph data
89	Deaton 1992	marine	35	28.5	0.3	28.8	Experiment	natural	brackish water marsh; Jourdan River; Mississippi; USA	Mollusca	Bivalvia	Geukensia demissa	euryhaline	blood	body fluid	2	8	4	4	Control-Impacted (CI)			Calcium	2.476	1.4	9.284	0.9	Standard Deviation	No	unknown	Replicates 4 - 12
90	Deaton 1992	marine	35	28.5	0.3	28.8	Experiment	natural	brackish water marsh; Jourdan River; Mississippi; USA	Mollusca	Bivalvia	Geukensia demissa	euryhaline	blood	body fluid	2	8	4	4	Control-Impacted (CI)			Chloride	1.887	1.9	519.3	26	Standard Deviation	No	unknown	Replicates 4 - 12
91	Deaton 1992	marine	35	28.5	0.3	28.8	Experiment	natural	brackish water marsh; Jourdan River; Mississippi; USA	Mollusca	Bivalvia	Geukensia demissa	euryhaline	blood	body fluid	2	8	4	4	Control-Impacted (CI)			Magnesium	2.941	0.8	50	4.4	Standard Deviation	No	unknown	Replicates 4 - 12
92	Deaton 1992	marine	35	28.5	0.3	28.8	Experiment	natural	brackish water marsh; Jourdan River; Mississippi; USA	Mollusca	Bivalvia	Geukensia demissa	euryhaline	blood	body fluid	2	8	4	4	Control-Impacted (CI)			Potassium	0.7212	0.3	12.77	1.4	Standard Deviation	No	unknown	Replicates 4 - 12
93	Deaton 1992	marine	35	28.5	0.3	28.8	Experiment	natural	brackish water marsh; Jourdan River; Mississippi; USA	Mollusca	Bivalvia	Geukensia demissa	euryhaline	blood	body fluid	2	8	4	4	Control-Impacted (CI)			Sodium	5.97	2	491.1	40	Standard Deviation	No	unknown	Replicates 4 - 12
94	Deaton 1992	marine	35	28.5	0.3	28.8	Experiment	natural	brackish water marsh; Jourdan River; Mississippi; USA	Mollusca	Bivalvia	Geukensia demissa	euryhaline	blood	body fluid	2	8	4	4	Control-Impacted (CI)			Total Osmolality	32.56	3	1028	48	Standard Deviation	No	unknown	Replicates 4 - 12
95	Deaton 1992	marine	35	27.4	1.4	28.8	Experiment	natural	purchased	Mollusca	Bivalvia	Mya arenaria	euryhaline	blood	body fluid	2	8	4	4	Control-Impacted (CI)			Calcium	3.872	0.5	9.896	0.5	Standard Deviation	No	unknown	Replicates 4 - 12
96	Deaton 1992	marine	35	27.4	1.4	28.8	Experiment	natural	purchased	Mollusca	Bivalvia	Mya arenaria	euryhaline	blood	body fluid	2	8	4	4	Control-Impacted (CI)			Chloride	18.4	1.5	519.3	0	Standard Deviation	No	unknown	Replicates 4 - 12
97	Deaton 1992	marine	35	27.4	1.4	28.8	Experiment	natural	purchased	Mollusca	Bivalvia	Mya arenaria	euryhaline	blood	body fluid	2	8	4	4	Control-Impacted (CI)			Magnesium	4.18	0.8	46.13	2.5	Standard Deviation	No	unknown	Replicates 4 - 12
98	Deaton 1992	marine	35	27.4	1.4	28.8	Experiment	natural	purchased	Mollusca	Bivalvia	Mya arenaria	euryhaline	blood	body fluid	2	8	4	4	Control-Impacted (CI)			Potassium	2.503	0.3	12.18	1.4	Standard Deviation	No	unknown	Replicates 4 - 12
99	Deaton 1992	marine	35	27.4	1.4	28.8	Experiment	natural	purchased	Mollusca	Bivalvia	Mya arenaria	euryhaline	blood	body fluid	2	8	4	4	Control-Impacted (CI)			Sodium	18.28	2	582.5	76	Standard Deviation	No	unknown	Replicates 4 - 12
100	Deaton 1992	marine	35	27.4	1.4	28.8	Experiment	natural	purchased	Mollusca	Bivalvia	Mya arenaria	euryhaline	blood	body fluid	2	8	4	4	Control-Impacted (CI)			Total Osmolality	54.65	11	1028	24	Standard Deviation	No	unknown	Replicates 4 - 12
101	Deaton et al. 1989	estuarine	22	19	0	19	Experiment	Natural	Peters Creek, Florida, USA	Mollusca	Bivalvia	Mytilopsis leucophaeata	oligohaline	whole body	tissue	2	9	3	3	Control-Impacted (CI)			Alanine	29.4	11.9	307.2	63.8	Standard Error	No	acute	Thr, Gln, Val, Met, Ile, Leu, Orn, Lys present in very low amounts (< 1 pmol * g- i dry wt)
102	Deaton et al. 1989	estuarine	22	19	0	19	Experiment	Natural	Peters Creek, Florida, USA	Mollusca	Bivalvia	Mytilopsis leucophaeata	oligohaline	whole body	tissue	2	9	3	3	Control-Impacted (CI)			Glutamate	8.9	4.8	18.2	3.2	Standard Error	No	acute	Thr, Gln, Val, Met, Ile, Leu, Orn, Lys present in very low amounts (< 1 pmol * g- i dry wt)
103	Deaton et al. 1989	estuarine	22	19	0	19	Experiment	Natural	Peters Creek, Florida, USA	Mollusca	Bivalvia	Mytilopsis leucophaeata	oligohaline	whole body	tissue	2	9	3	3	Control-Impacted (CI)			Glycine	14.9	8.4	188.6	18.7	Standard Error	No	acute	Thr, Gln, Val, Met, Ile, Leu, Orn, Lys present in very low amounts (< 1 pmol * g- i dry wt)
104	Deaton et al. 1989	estuarine	22	19	0	19	Experiment	Natural	Peters Creek, Florida, USA	Mollusca	Bivalvia	Mytilopsis leucophaeata	oligohaline	whole body	tissue	2	9	3	3	Control-Impacted (CI)			Others	97.5	14.2	52.9	13.2	Standard Error	No	acute	Thr, Gln, Val, Met, Ile, Leu, Orn, Lys present in very low amounts (< 1 pmol * g- i dry wt)
105	Deaton et al. 1989	estuarine	22	19	0	19	Experiment	Natural	Peters Creek, Florida, USA	Mollusca	Bivalvia	Mytilopsis leucophaeata	oligohaline	whole body	tissue	2	9	3	3	Control-Impacted (CI)			Serine	12.9	7.2	11	0.9	Standard Error	No	acute	Thr, Gln, Val, Met, Ile, Leu, Orn, Lys present in very low amounts (< 1 pmol * g- i dry wt)
106	Deaton et al. 1989	estuarine	22	19	0	19	Experiment	Natural	Peters Creek, Florida, USA	Mollusca	Bivalvia	Mytilopsis leucophaeata	oligohaline	whole body	tissue	2	9	3	3	Control-Impacted (CI)			Total Organics	166.9	88.1	590	61.7	Standard Error	No	acute	Thr, Gln, Val, Met, Ile, Leu, Orn, Lys present in very low amounts (< 1 pmol * g- i dry wt)
107	Deaton et al. 1989	estuarine	22	19	0	19	Experiment	Natural	Peters Creek, Florida, USA	Mollusca	Bivalvia	Mytilopsis leucophaeata	oligohaline	whole body	tissue	2	9	3	3	Control-Impacted (CI)			β-Alanine	5.6	3	14.8	3.3	Standard Error	No	acute	Thr, Gln, Val, Met, Ile, Leu, Orn, Lys present in very low amounts (< 1 pmol * g- i dry wt)
108	Deaton et al. 1989	lotic	21	17	0.2	17.2	Experiment	natural	Peters Creek,Florida	Mollusca	Bivalvia	Mytilopsis leucophaeta	oligohaline	blood	body fluid	2	13	6	6	Control-Impacted (CI)	Dilution with DI		Calcium	2.08	0.489898	6.875	0.489898	Standard Error	No	acute	Only dilutions with natural well water taken // no control - lowest treatment lies in range of habitat salinity
109	Deaton et al. 1989	lotic	21	17	0.2	17.2	Experiment	natural	Peters Creek,Florida	Mollusca	Bivalvia	Mytilopsis leucophaeta	oligohaline	blood	body fluid	2	13	6	6	Control-Impacted (CI)	Dilution with DI		Chloride	0.8174	2.44949	296.3	3.18434	Standard Error	No	acute	Only dilutions with natural well water taken // no control - lowest treatment lies in range of habitat salinity // Standard error smaller than data points
110	Deaton et al. 1989	lotic	21	17	0.2	17.2	Experiment	natural	Peters Creek,Florida	Mollusca	Bivalvia	Mytilopsis leucophaeta	oligohaline	blood	body fluid	2	13	6	6	Control-Impacted (CI)	Dilution with DI		Magnesium	0.9826	0.244949	29.58	0.734847	Standard Error	No	acute	Only dilutions with natural well water taken // no control - lowest treatment lies in range of habitat salinity
111	Deaton et al. 1989	lotic	21	17	0.2	17.2	Experiment	natural	Peters Creek,Florida	Mollusca	Bivalvia	Mytilopsis leucophaeta	oligohaline	blood	body fluid	2	13	6	6	Control-Impacted (CI)	Dilution with DI		Potassium	0.7827	0.244949	6.14	1.22474	Standard Error	No	acute	Only dilutions with natural well water taken // no control - lowest treatment lies in range of habitat salinity
112	Deaton et al. 1989	lotic	21	17	0.2	17.2	Experiment	natural	Peters Creek,Florida	Mollusca	Bivalvia	Mytilopsis leucophaeta	oligohaline	blood	body fluid	2	13	6	6	Control-Impacted (CI)	Dilution with DI		Sodium	15.39	1.71464	158.1	6.36867	Standard Error	No	acute	Only dilutions with natural well water taken // no control - lowest treatment lies in range of habitat salinity
113	Deaton et al. 1989	lotic	21	17	0.2	17.2	Experiment	natural	Peters Creek,Florida	Mollusca	Bivalvia	Mytilopsis leucophaeta	oligohaline	blood	body fluid	2	13	6	6	Control-Impacted (CI)	Dilution with DI		Total Osmolality	40.98	7.34847	605.9	7.34847	Standard Error	No	acute	Only dilutions with natural well water taken // no control - lowest treatment lies in range of habitat salinity // Standard error smaller than data points
114	Emerson 1969	marine	16	17.5	17.5	35	Experiment	artificial	Juneau, Alaska, USA	Mollusca	Bivalvia	Macoma inconspicua	euryhaline	whole-body	tissue	1	2	12	12	Control-Impacted (CI)			Chloride	20.2	2.47436	30.05	5.83242	Confidence Interval 95%	No	acute
115	Emerson 1969	marine	16	17.5	17.5	35	Experiment	artificial	Juneau, Alaska, USA	Mollusca	Bivalvia	Macoma inconspicua	euryhaline	whole body	tissue	1	2	12	12	Control-Impacted (CI)			Total Organics	12.69	1.59066	28.36	4.24176	Confidence Interval 95%	No	acute
116	Gainey & Greenberg 1977	estuarine	14	34.1	0	39	Experiment	natural	Ochlockonee Bay, Florida	Mollusca	Bivalvia	Polymesoda caroliniana	oligohaline	Blood	body fluid	4	11	7	7	Regression			Total Osmolality	55	6.6	1205	5.47	Standard Deviation	No	acute	not clear if regression was calculated using all datapoints or means
117	Gainey & Greenberg 1977	marine	14	43	2	45	Experiment	natural	Saltmarsh, Porter Island, Florida	Mollusca	Bivalvia	Pseudocyrena floridana	euryhaline	Blood	body fluid	4	9	5	8	Regression			Total Osmolality	90	9.3	1416	6.66	Standard Deviation	No	acute	not clear if regression was calculated using all datapoints or means
118	Gainey 1978b	estuarine	14	10	0	10	Experiment	NA	Ochlockonee Bay, Florida, USA	Mollusca	Bivalvia	Polymesoda caroliniana	oligohaline	foot muscle	tissue	2	2	3	2	Control-Impacted (CI)			Alanine	4.834	3.51	134.632	8.137	Standard Deviation	No	acute	Cys, Val, Met, Ile, Leu, Tyr, Phe, His, Lys, and Arg present, but low in concentration and no salinity effect
119	Gainey 1978b	estuarine	14	10	0	10	Experiment	NA	Ochlockonee Bay, Florida, USA	Mollusca	Bivalvia	Polymesoda caroliniana	oligohaline	foot muscle	tissue	2	2	3	2	Control-Impacted (CI)			Aspartate	0	0	4.322	0.703	Standard Deviation	No	acute	Cys, Val, Met, Ile, Leu, Tyr, Phe, His, Lys, and Arg present, but low in concentration and no salinity effect
120	Gainey 1978b	estuarine	14	10	0	10	Experiment	NA	Ochlockonee Bay, Florida, USA	Mollusca	Bivalvia	Polymesoda caroliniana	oligohaline	foot muscle	tissue	2	2	3	2	Control-Impacted (CI)			Glutamate	4.152	1.101	24.882	0.881	Standard Deviation	No	acute	Cys, Val, Met, Ile, Leu, Tyr, Phe, His, Lys, and Arg present, but low in concentration and no salinity effect
121	Gainey 1978b	estuarine	14	10	0	10	Experiment	NA	Ochlockonee Bay, Florida, USA	Mollusca	Bivalvia	Polymesoda caroliniana	oligohaline	foot muscle	tissue	2	2	3	2	Control-Impacted (CI)			Glycine	1.574	0.748	11.758	1.64	Standard Deviation	No	acute	Cys, Val, Met, Ile, Leu, Tyr, Phe, His, Lys, and Arg present, but low in concentration and no salinity effect
122	Gainey 1978b	estuarine	14	10	0	10	Experiment	NA	Ochlockonee Bay, Florida, USA	Mollusca	Bivalvia	Polymesoda caroliniana	oligohaline	foot muscle	tissue	2	2	3	2	Control-Impacted (CI)			Ornithine	10.588	1.213	1.526	0.936	Standard Deviation	No	acute	Cys, Val, Met, Ile, Leu, Tyr, Phe, His, Lys, and Arg present, but low in concentration and no salinity effect
123	Gainey 1978b	estuarine	14	10	0	10	Experiment	NA	Ochlockonee Bay, Florida, USA	Mollusca	Bivalvia	Polymesoda caroliniana	oligohaline	foot muscle	tissue	2	2	3	2	Control-Impacted (CI)			Proline	0	0	0	0	Standard Deviation	No	acute	Cys, Val, Met, Ile, Leu, Tyr, Phe, His, Lys, and Arg present, but low in concentration and no salinity effect
124	Gainey 1978b	estuarine	14	10	0	10	Experiment	NA	Ochlockonee Bay, Florida, USA	Mollusca	Bivalvia	Polymesoda caroliniana	oligohaline	foot muscle	tissue	2	2	3	2	Control-Impacted (CI)			Serine	2.229	0.835	5.35	3.4	Standard Deviation	No	acute	Cys, Val, Met, Ile, Leu, Tyr, Phe, His, Lys, and Arg present, but low in concentration and no salinity effect
125	Gainey 1978b	estuarine	14	10	0	10	Experiment	NA	Ochlockonee Bay, Florida, USA	Mollusca	Bivalvia	Polymesoda caroliniana	oligohaline	foot muscle	tissue	2	2	3	2	Control-Impacted (CI)			Taurine	1.975	0.922	8.021	3.23	Standard Deviation	No	acute	Cys, Val, Met, Ile, Leu, Tyr, Phe, His, Lys, and Arg present, but low in concentration and no salinity effect
126	Gainey 1978b	estuarine	14	10	0	10	Experiment	NA	Ochlockonee Bay, Florida, USA	Mollusca	Bivalvia	Polymesoda caroliniana	oligohaline	foot muscle	tissue	2	2	3	2	Control-Impacted (CI)			Total Organics	26.77	2.9	204.5	0.71	Standard Deviation	No	acute	Cys, Val, Met, Ile, Leu, Tyr, Phe, His, Lys, and Arg present, but low in concentration and no salinity effect
127	Henry et al. 1990	marine	21	15	20	35	Experiment	artificial	Gulf of Mexico	Arthropoda	Malacostraca	Chaceon fenneri	stenohaline	haemolymph	body fluid	2	2	4	4	Control-Impacted (CI)			Calcium	10.19	1.6	12.99	1	Standard Error	No	gradual (2ppt/day)	Replicates 4-6
128	Henry et al. 1990	marine	21	15	20	35	Experiment	artificial	Gulf of Mexico	Arthropoda	Malacostraca	Chaceon fenneri	stenohaline	haemolymph	body fluid	2	2	4	4	Control-Impacted (CI)			Chloride	317.4	44	509.2	20	Standard Error	No	gradual (2ppt/day)	Replicates 4-6
129	Henry et al. 1990	marine	21	15	20	35	Experiment	artificial	Gulf of Mexico	Arthropoda	Malacostraca	Chaceon fenneri	stenohaline	haemolymph	body fluid	2	2	4	4	Control-Impacted (CI)			Magnesium	18.76	2	19.22	1	Standard Error	No	gradual (2ppt/day)	Replicates 4-6
130	Henry et al. 1990	marine	21	15	20	35	Experiment	artificial	Gulf of Mexico	Arthropoda	Malacostraca	Chaceon fenneri	stenohaline	haemolymph	body fluid	2	2	4	4	Control-Impacted (CI)			Potassium	3.413	1	8.053	1.6	Standard Error	No	gradual (2ppt/day)	Replicates 4-6
131	Henry et al. 1990	marine	21	15	20	35	Experiment	artificial	Gulf of Mexico	Arthropoda	Malacostraca	Chaceon fenneri	stenohaline	haemolymph	body fluid	2	2	4	4	Control-Impacted (CI)			Sodium	237.7	36	473.8	16	Standard Error	No	gradual (2ppt/day)	Replicates 4-6
132	Henry et al. 1990	marine	21	15	20	35	Experiment	artificial	Gulf of Mexico	Arthropoda	Malacostraca	Chaceon fenneri	stenohaline	haemolymph	body fluid	2	2	4	4	Control-Impacted (CI)			Total Osmolality	641	84	1062	20	Standard Error	No	gradual (2ppt/day)	Replicates 4-6
133	Henry et al. 1990	marine	21	15	20	35	Experiment	artificial	Gulf of Mexico	Arthropoda	Malacostraca	Chaceon quinquedens	stenohaline	haemolymph	body fluid	2	2	4	4	Control-Impacted (CI)			Calcium	9.656	1	12.56	1.2	Standard Error	No	gradual (2ppt/day)	Replicates 4-6
134	Henry et al. 1990	marine	21	15	20	35	Experiment	artificial	Gulf of Mexico	Arthropoda	Malacostraca	Chaceon quinquedens	stenohaline	haemolymph	body fluid	2	2	4	4	Control-Impacted (CI)			Chloride	333.3	20	541.8	16	Standard Error	No	gradual (2ppt/day)	Replicates 4-6
135	Henry et al. 1990	marine	21	15	20	35	Experiment	artificial	Gulf of Mexico	Arthropoda	Malacostraca	Chaceon quinquedens	stenohaline	haemolymph	body fluid	2	2	4	4	Control-Impacted (CI)			Magnesium	19.29	1	19.54	0.6	Standard Error	No	gradual (2ppt/day)	Replicates 4-6
136	Henry et al. 1990	marine	21	15	20	35	Experiment	artificial	Gulf of Mexico	Arthropoda	Malacostraca	Chaceon quinquedens	stenohaline	haemolymph	body fluid	2	2	4	4	Control-Impacted (CI)			Potassium	3.942	1	10.09	1.6	Standard Error	No	gradual (2ppt/day)	Replicates 4-6
137	Henry et al. 1990	marine	21	15	20	35	Experiment	artificial	Gulf of Mexico	Arthropoda	Malacostraca	Chaceon quinquedens	stenohaline	haemolymph	body fluid	2	2	4	4	Control-Impacted (CI)			Sodium	236.2	14	463.8	20	Standard Error	No	gradual (2ppt/day)	Replicates 4-6
138	Henry et al. 1990	marine	21	20	15	35	Experiment	artificial	Gulf of Mexico	Arthropoda	Malacostraca	Chaceon quinquedens	stenohaline	haemolymph	body fluid	2	2	4	4	Control-Impacted (CI)			Total Osmolality	649.5	116	1075	20	Standard Error	No	gradual (2ppt/day)	Replicates 4-6
139	Hildreth & Stickle 1980	marine	35	22.5	7.5	30	Experiment	artificial	Barataria Bay, USA	Mollusca	Gastropoda	Stramonita haemastoma	euryhaline	haemolymph	body fluid	2	4	5	5	Control-Impacted (CI)	Temperature	Longterm salinity fluctuation	Chloride	93	8.94427	477	11.1803	Standard Error	No	gradual (2psu/day)	T 20°C (other T treatments not transferred 10° and 30°C)
140	Hildreth & Stickle 1980	marine	35	22.5	7.5	30	Experiment	artificial	Barataria Bay, USA	Mollusca	Gastropoda	Stramonita haemastoma	euryhaline	haemolymph	body fluid	2	4	5	5	Control-Impacted (CI)	Temperature	Longterm salinity fluctuation	Magnesium	21.8	2.23607	49.3	6.4846	Standard Error	No	gradual (2psu/day)	T 20°C (other T treatments not transferred 10° and 30°C)
141	Hildreth & Stickle 1980	marine	35	22.5	7.5	30	Experiment	artificial	Barataria Bay, USA	Mollusca	Gastropoda	Stramonita haemastoma	euryhaline	haemolymph	body fluid	2	4	5	5	Control-Impacted (CI)	Temperature	Longterm salinity fluctuation	Potassium	6.5	1.56525	9.7	1.34164	Standard Error	No	gradual (2psu/day)	T 20°C (other T treatments not transferred 10° and 30°C)
142	Hildreth & Stickle 1980	marine	35	22.5	7.5	30	Experiment	artificial	Barataria Bay, USA	Mollusca	Gastropoda	Stramonita haemastoma	euryhaline	haemolymph	body fluid	2	4	5	5	Control-Impacted (CI)	Temperature	Longterm salinity fluctuation	Sodium	84	20.1246	354	24.5967	Standard Error	No	gradual (2psu/day)	T 20°C (other T treatments not transferred 10° and 30°C)
143	Hildreth & Stickle 1980	marine	35	22.5	7.5	30	Experiment	artificial	Barataria Bay, USA	Mollusca	Gastropoda	Stramonita haemastoma	euryhaline	foot	tissue	2	4	5	1	Control-Impacted (CI)	Temperature	Longterm salinity fluctuation	Total Organics	37.3	0.936182	117.37	12.4556	Standard Error	No	gradual (2psu/day)	T 20°C
144	Hildreth & Stickle 1980	marine	35	22.5	7.5	30	Experiment	artificial	Barataria Bay, USA	Mollusca	Gastropoda	Stramonita haemastoma	euryhaline	haemolymph	body fluid	2	4	5	5	Control-Impacted (CI)	Temperature	Longterm salinity fluctuation	Total Osmolality	224	11.1803	877	4.47214	Standard Error	No	gradual (2psu/day)	T 20°C (other T treatments not transferred 10° and 30°C)
145	Hiong et al. 2004	marine	17	20	10	30	Experiment	NA	Kranji, Singapore	Mollusca	Bivalvia	Polymesoda expansa	euryhaline	adductor muscle	tissue	1	2	4	4	Control-Impacted (CI)	Exposure to air		Alanine	30.96	0	111.6	8	Standard Error	No	acute
146	Hiong et al. 2004	marine	17	20	10	30	Experiment	NA	Kranji, Singapore	Mollusca	Bivalvia	Polymesoda expansa	euryhaline	foot muscle	tissue	1	2	4	4	Control-Impacted (CI)	Exposure to air		Alanine	37.93	14	117.3	16	Standard Error	No	acute
147	Hiong et al. 2004	marine	17	20	10	30	Experiment	NA	Kranji, Singapore	Mollusca	Bivalvia	Polymesoda expansa	euryhaline	hepatopancreas	tissue	1	2	4	4	Control-Impacted (CI)	Exposure to air		Alanine	15.55	3	97.24	10	Standard Error	No	acute
148	Hiong et al. 2004	marine	17	20	10	30	Experiment	NA	Kranji, Singapore	Mollusca	Bivalvia	Polymesoda expansa	euryhaline	mantle	tissue	1	2	4	4	Control-Impacted (CI)	Exposure to air		Alanine	11.54	0	64.73	10	Standard Error	No	acute
149	Hiong et al. 2004	marine	17	20	10	30	Experiment	NA	Kranji, Singapore	Mollusca	Bivalvia	Polymesoda expansa	euryhaline	plasma	body fluid	1	2	5	5	Control-Impacted (CI)	Exposure to air		Ammonia	1.43	0.223607	1.515	0.223607	Standard Error	No	acute
150	Hiong et al. 2004	marine	17	20	10	30	Experiment	NA	Kranji, Singapore	Mollusca	Bivalvia	Polymesoda expansa	euryhaline	adductor muscle	tissue	1	2	5	5	Control-Impacted (CI)	Exposure to air		Ammonia	1.324	0.447214	1.695	0.223607	Standard Error	No	acute
151	Hiong et al. 2004	marine	17	20	10	30	Experiment	NA	Kranji, Singapore	Mollusca	Bivalvia	Polymesoda expansa	euryhaline	foot muscle	tissue	1	2	5	5	Control-Impacted (CI)	Exposure to air		Ammonia	1.345	0.447214	2.066	0.67082	Standard Error	No	acute
152	Hiong et al. 2004	marine	17	20	10	30	Experiment	NA	Kranji, Singapore	Mollusca	Bivalvia	Polymesoda expansa	euryhaline	hepatopancreas	tissue	1	2	5	5	Control-Impacted (CI)	Exposure to air		Ammonia	1.197	0.223607	1.589	0.447214	Standard Error	No	acute
153	Hiong et al. 2004	marine	17	20	10	30	Experiment	NA	Kranji, Singapore	Mollusca	Bivalvia	Polymesoda expansa	euryhaline	mantle	tissue	1	2	5	5	Control-Impacted (CI)	Exposure to air		Ammonia	0.2648	0.447214	0.2966	0	Standard Error	No	acute
154	Hiong et al. 2004	marine	17	20	10	30	Experiment	NA	Kranji, Singapore	Mollusca	Bivalvia	Polymesoda expansa	euryhaline	adductor muscle	tissue	1	2	4	4	Control-Impacted (CI)	Exposure to air		Glutamate	7.967	2	7.797	2.2	Standard Error	No	acute
155	Hiong et al. 2004	marine	17	20	10	30	Experiment	NA	Kranji, Singapore	Mollusca	Bivalvia	Polymesoda expansa	euryhaline	foot muscle	tissue	1	2	4	4	Control-Impacted (CI)	Exposure to air		Glutamate	11.07	3	9.179	1.4	Standard Error	No	acute
156	Hiong et al. 2004	marine	17	20	10	30	Experiment	NA	Kranji, Singapore	Mollusca	Bivalvia	Polymesoda expansa	euryhaline	hepatopancreas	tissue	1	2	4	4	Control-Impacted (CI)	Exposure to air		Glutamate	3.37	1.2	5.175	0.6	Standard Error	No	acute
157	Hiong et al. 2004	marine	17	20	10	30	Experiment	NA	Kranji, Singapore	Mollusca	Bivalvia	Polymesoda expansa	euryhaline	mantle	tissue	1	2	4	4	Control-Impacted (CI)	Exposure to air		Glutamate	3.06	0.4	3.99	0.4	Standard Error	No	acute
158	Hiong et al. 2004	marine	17	20	10	30	Experiment	NA	Kranji, Singapore	Mollusca	Bivalvia	Polymesoda expansa	euryhaline	adductor muscle	tissue	1	2	4	4	Control-Impacted (CI)	Exposure to air		Glutamine	6.663	8	10.05	1.6	Standard Error	No	acute
159	Hiong et al. 2004	marine	17	20	10	30	Experiment	NA	Kranji, Singapore	Mollusca	Bivalvia	Polymesoda expansa	euryhaline	foot muscle	tissue	1	2	4	4	Control-Impacted (CI)	Exposure to air		Glutamine	12.23	8	17.45	7.2	Standard Error	No	acute
160	Hiong et al. 2004	marine	17	20	10	30	Experiment	NA	Kranji, Singapore	Mollusca	Bivalvia	Polymesoda expansa	euryhaline	hepatopancreas	tissue	1	2	4	4	Control-Impacted (CI)	Exposure to air		Glutamine	3.138	1.6	10.05	8.4	Standard Error	No	acute
161	Hiong et al. 2004	marine	17	20	10	30	Experiment	NA	Kranji, Singapore	Mollusca	Bivalvia	Polymesoda expansa	euryhaline	mantle	tissue	1	2	4	4	Control-Impacted (CI)	Exposure to air		Glutamine	4.195	2	4.971	0.6	Standard Error	No	acute
162	Hiong et al. 2004	marine	17	20	10	30	Experiment	NA	Kranji, Singapore	Mollusca	Bivalvia	Polymesoda expansa	euryhaline	adductor muscle	tissue	1	2	4	4	Control-Impacted (CI)	Exposure to air		Glycine	1.089	0.4	6.233	1.2	Standard Error	No	acute
163	Hiong et al. 2004	marine	17	20	10	30	Experiment	NA	Kranji, Singapore	Mollusca	Bivalvia	Polymesoda expansa	euryhaline	foot muscle	tissue	1	2	4	4	Control-Impacted (CI)	Exposure to air		Glycine	1.906	0.8	6.899	2.8	Standard Error	No	acute
164	Hiong et al. 2004	marine	17	20	10	30	Experiment	NA	Kranji, Singapore	Mollusca	Bivalvia	Polymesoda expansa	euryhaline	hepatopancreas	tissue	1	2	4	4	Control-Impacted (CI)	Exposure to air		Glycine	3.147	1.4	14.19	7.6	Standard Error	No	acute
165	Hiong et al. 2004	marine	17	20	10	30	Experiment	NA	Kranji, Singapore	Mollusca	Bivalvia	Polymesoda expansa	euryhaline	mantle	tissue	1	2	4	4	Control-Impacted (CI)	Exposure to air		Glycine	1.271	0.4	3.752	0.4	Standard Error	No	acute
166	Hiong et al. 2004	marine	17	20	10	30	Experiment	NA	Kranji, Singapore	Mollusca	Bivalvia	Polymesoda expansa	euryhaline	adductor muscle	tissue	1	2	4	4	Control-Impacted (CI)	Exposure to air		Total Organics	64.27	20	167	10	Standard Error	No	acute
167	Hiong et al. 2004	marine	17	20	10	30	Experiment	NA	Kranji, Singapore	Mollusca	Bivalvia	Polymesoda expansa	euryhaline	foot muscle	tissue	1	2	4	4	Control-Impacted (CI)	Exposure to air		Total Organics	83	22	191.8	16	Standard Error	No	acute
168	Hiong et al. 2004	marine	17	20	10	30	Experiment	NA	Kranji, Singapore	Mollusca	Bivalvia	Polymesoda expansa	euryhaline	hepatopancreas	tissue	1	2	4	4	Control-Impacted (CI)	Exposure to air		Total Organics	35.43	10	148.3	28	Standard Error	No	acute
169	Hiong et al. 2004	marine	17	20	10	30	Experiment	NA	Kranji, Singapore	Mollusca	Bivalvia	Polymesoda expansa	euryhaline	mantle	tissue	1	2	4	4	Control-Impacted (CI)	Exposure to air		Total Organics	24.8	6	89.07	12	Standard Error	No	acute
170	Kapper et al. 1985	marine	14	30	5	30	Experiment	artificial	Caminada Pass, Louisiana	Mollusca	Gastropoda	Stramonita haemastoma	euryhaline	foot muscle	tissue	1	6	6	6	Control-Impacted (CI)			Alanine	6	0	113	22.0454	Standard Error	No	gradual (2ppt/day)
171	Kapper et al. 1985	marine	14	30	5	30	Experiment	artificial	Caminada Pass, Louisiana	Mollusca	Gastropoda	Stramonita haemastoma	euryhaline	foot muscle	tissue	1	6	6	6	Control-Impacted (CI)			Arginine	33	4.89898	22	4.89898	Standard Error	No	gradual (2ppt/day)
172	Kapper et al. 1985	marine	14	30	5	30	Experiment	artificial	Caminada Pass, Louisiana	Mollusca	Gastropoda	Stramonita haemastoma	euryhaline	foot muscle	tissue	1	6	6	6	Control-Impacted (CI)			Aspartate	25	2.44949	32	9.79796	Standard Error	No	gradual (2ppt/day)
173	Kapper et al. 1985	marine	14	30	5	30	Experiment	artificial	Caminada Pass, Louisiana	Mollusca	Gastropoda	Stramonita haemastoma	euryhaline	foot muscle	tissue	1	6	6	6	Control-Impacted (CI)			Glutamate	3	0	34	17.1464	Standard Error	No	gradual (2ppt/day)
174	Kapper et al. 1985	marine	14	30	5	30	Experiment	artificial	Caminada Pass, Louisiana	Mollusca	Gastropoda	Stramonita haemastoma	euryhaline	foot muscle	tissue	1	6	6	6	Control-Impacted (CI)			Glycine	2	0	62	9.79796	Standard Error	No	gradual (2ppt/day)
175	Kapper et al. 1985	marine	14	30	5	30	Experiment	artificial	Caminada Pass, Louisiana	Mollusca	Gastropoda	Stramonita haemastoma	euryhaline	foot muscle	tissue	1	6	6	6	Control-Impacted (CI)			Lysine	5	2.44949	6	0	Standard Error	No	gradual (2ppt/day)
176	Kapper et al. 1985	marine	14	30	5	30	Experiment	artificial	Caminada Pass, Louisiana	Mollusca	Gastropoda	Stramonita haemastoma	euryhaline	foot muscle	tissue	1	6	6	6	Control-Impacted (CI)			Phosphoserine	9	2.44949	0	0	Standard Error	No	gradual (2ppt/day)
177	Kapper et al. 1985	marine	14	30	5	30	Experiment	artificial	Caminada Pass, Louisiana	Mollusca	Gastropoda	Stramonita haemastoma	euryhaline	foot muscle	tissue	1	6	6	6	Control-Impacted (CI)			Proline	0	0	41	12.2474	Standard Error	No	gradual (2ppt/day)
178	Kapper et al. 1985	marine	14	30	5	30	Experiment	artificial	Caminada Pass, Louisiana	Mollusca	Gastropoda	Stramonita haemastoma	euryhaline	foot muscle	tissue	1	6	6	6	Control-Impacted (CI)			Serine	0	0	30	19.5959	Standard Error	No	gradual (2ppt/day)
179	Kapper et al. 1985	marine	14	30	5	30	Experiment	artificial	Caminada Pass, Louisiana	Mollusca	Gastropoda	Stramonita haemastoma	euryhaline	foot muscle	tissue	1	6	6	6	Control-Impacted (CI)			Taurine	0	0	24	0	Standard Error	No	gradual (2ppt/day)
180	Kapper et al. 1985	marine	14	30	5	30	Experiment	artificial	Caminada Pass, Louisiana	Mollusca	Gastropoda	Stramonita haemastoma	euryhaline	foot muscle	tissue	1	6	6	6	Control-Impacted (CI)			Threonine	0	0	8	4.89898	Standard Error	No	gradual (2ppt/day)
181	Kapper et al. 1985	marine	14	30	5	30	Experiment	artificial	Caminada Pass, Louisiana	Mollusca	Gastropoda	Stramonita haemastoma	euryhaline	foot muscle	tissue	1	6	12	12	Control-Impacted (CI)			Total Organics	144.3	12.1244	517.1	55.4256	Standard Error	No	gradual (2ppt/day)
182	Knight et al. 1992	marine	14	20	10	30	Experiment	natural	Long Island Sound, Connecticut	Porifera		Microciona prolifera	euryhaline	whole-body	tissue	1	4	3	3	Control-Impacted (CI)			Alanine	3.27	1.2	7.973	0.4	Standard Deviation	No	gradual (5ppt/3days)
183	Knight et al. 1992	marine	14	20	10	30	Experiment	natural	Long Island Sound, Connecticut	Porifera		Microciona prolifera	euryhaline	whole-body	tissue	1	4	3	3	Control-Impacted (CI)			Arginine	0	0	3.27	0.9	Standard Deviation	No	gradual (5ppt/3days)
184	Knight et al. 1992	marine	14	20	10	30	Experiment	natural	Long Island Sound, Connecticut	Porifera		Microciona prolifera	euryhaline	whole-body	tissue	1	4	3	3	Control-Impacted (CI)			Asparagine	1.118	0.4	7.573	5	Standard Deviation	No	gradual (5ppt/3days)
185	Knight et al. 1992	marine	14	20	10	30	Experiment	natural	Long Island Sound, Connecticut	Porifera		Microciona prolifera	euryhaline	whole-body	tissue	1	4	3	3	Control-Impacted (CI)			Glutamine	6.522	2.1	11.43	9	Standard Deviation	No	gradual (5ppt/3days)
186	Knight et al. 1992	marine	14	20	10	30	Experiment	natural	Long Island Sound, Connecticut	Porifera		Microciona prolifera	euryhaline	whole-body	tissue	1	4	3	3	Control-Impacted (CI)			Glycine	11.58	0	169.8	23	Standard Deviation	No	gradual (5ppt/3days)
187	Knight et al. 1992	marine	14	20	10	30	Experiment	natural	Long Island Sound, Connecticut	Porifera		Microciona prolifera	euryhaline	whole-body	tissue	1	4	3	3	Control-Impacted (CI)			Histidine	0	0	3.32	3	Standard Deviation	No	gradual (5ppt/3days)
188	Knight et al. 1992	marine	14	20	10	30	Experiment	natural	Long Island Sound, Connecticut	Porifera		Microciona prolifera	euryhaline	whole-body	tissue	1	4	3	3	Control-Impacted (CI)			Isoleucine	1.368	0.8	4.571	0.5	Standard Deviation	No	gradual (5ppt/3days)
189	Knight et al. 1992	marine	14	20	10	30	Experiment	natural	Long Island Sound, Connecticut	Porifera		Microciona prolifera	euryhaline	whole-body	tissue	1	4	3	3	Control-Impacted (CI)			Leucine	2.319	1	5.121	2	Standard Deviation	No	gradual (5ppt/3days)
190	Knight et al. 1992	marine	14	20	10	30	Experiment	natural	Long Island Sound, Connecticut	Porifera		Microciona prolifera	euryhaline	whole-body	tissue	1	4	3	3	Control-Impacted (CI)			Lysine	2.369	2	13.98	14	Standard Deviation	No	gradual (5ppt/3days)
191	Knight et al. 1992	marine	14	20	10	30	Experiment	natural	Long Island Sound, Connecticut	Porifera		Microciona prolifera	euryhaline	whole-body	tissue	1	4	3	3	Control-Impacted (CI)			Methionine	0.9681	0.3	14.43	18	Standard Deviation	No	gradual (5ppt/3days)
192	Knight et al. 1992	marine	14	20	10	30	Experiment	natural	Long Island Sound, Connecticut	Porifera		Microciona prolifera	euryhaline	whole-body	tissue	1	4	3	3	Control-Impacted (CI)			Phenylalanine	0.7216	2.5	23.98	3	Standard Deviation	No	gradual (5ppt/3days)
193	Knight et al. 1992	marine	14	20	10	30	Experiment	natural	Long Island Sound, Connecticut	Porifera		Microciona prolifera	euryhaline	whole-body	tissue	1	4	3	3	Control-Impacted (CI)			Proline	1.268	0.4	5.021	0.6	Standard Deviation	No	gradual (5ppt/3days)
194	Knight et al. 1992	marine	14	20	10	30	Experiment	natural	Long Island Sound, Connecticut	Porifera		Microciona prolifera	euryhaline	whole-body	tissue	1	4	3	3	Control-Impacted (CI)			Serine	3.27	1.1	4.821	1.1	Standard Deviation	No	gradual (5ppt/3days)
195	Knight et al. 1992	marine	14	20	10	30	Experiment	natural	Long Island Sound, Connecticut	Porifera		Microciona prolifera	euryhaline	whole-body	tissue	1	4	3	3	Control-Impacted (CI)			Taurine	4.521	0.1	11.58	0.9	Standard Deviation	No	gradual (5ppt/3days)
196	Knight et al. 1992	marine	14	20	10	30	Experiment	natural	Long Island Sound, Connecticut	Porifera		Microciona prolifera	euryhaline	whole-body	tissue	1	4	3	3	Control-Impacted (CI)			Threonine	0	0	3.92	0.4	Standard Deviation	No	gradual (5ppt/3days)
197	Knight et al. 1992	marine	14	20	10	30	Experiment	natural	Long Island Sound, Connecticut	Porifera		Microciona prolifera	euryhaline	whole-body	tissue	1	4	3	3	Control-Impacted (CI)			Total Organics	40.31	4	290.4	4	Standard Deviation	No	gradual (5ppt/3days)
198	Kube et al. 2007	marine	in situ	30.1	3.7	33.6	in situ	natural	Baltic Sea & Atlantic	Mollusca	Bivalvia	Macoma balthica	euryhaline	whole body	tissue	2	5	5	5	Control-Impacted (CI)	Seasonality		Alanine	16.6954	10.4658	126.81	87.7103	Standard Deviation	no	NA	values are yearly means/ for each location at each time n= 8 - 20
199	Kube et al. 2007	marine	in situ	30.1	3.7	33.6	in situ	natural	Baltic Sea & Atlantic	Mollusca	Bivalvia	Macoma balthica	euryhaline	whole body	tissue	2	5	5	5	Control-Impacted (CI)	Seasonality		Glycine	34.164	15.5734	90.458	29.365	Standard Deviation	no	NA	values are yearly means/ for each location at each time n= 8 - 20
200	Kube et al. 2007	marine	in situ	30.1	3.7	33.6	in situ	natural	Baltic Sea & Atlantic	Mollusca	Bivalvia	Macoma balthica	euryhaline	whole body	tissue	2	5	5	5	Control-Impacted (CI)	Seasonality		Taurine	1.31608	0.744106	89.24	31.0944	Standard Deviation	no	NA	values are yearly means/ for each location at each time n= 8 - 20
201	Kube et al. 2007	marine	in situ	31.9	6.1	38	in situ	natural	Baltic Sea & Atlantic & Mediterranean	Mollusca	Bivalvia	Mytilus edulis	euryhaline	whole body	tissue	2	7	5	5	Control-Impacted (CI)	Seasonality		Alanine	7.91986	4.68077	25.664	9.7274	Standard Deviation	no	NA	values are yearly means/ for each location at each time n= 3-10
202	Kube et al. 2007	marine	in situ	31.9	6.1	38	in situ	natural	Baltic Sea & Atlantic & Mediterranean	Mollusca	Bivalvia	Mytilus edulis	euryhaline	whole body	tissue	2	7	5	5	Control-Impacted (CI)	Seasonality		Glycine	27.226	9.71572	90.306	26.8074	Standard Deviation	no	NA	values are yearly means/ for each location at each time n= 3-10
203	Kube et al. 2007	marine	in situ	31.9	6.1	38	in situ	natural	Baltic Sea & Atlantic & Mediterranean	Mollusca	Bivalvia	Mytilus edulis	euryhaline	whole body	tissue	2	7	5	5	Control-Impacted (CI)	Seasonality		Taurine	2.047	2.70443	173.54	26.1868	Standard Deviation	no	NA	values are yearly means/ for each location at each time n= 3-10
204	Lee & Chen 2003	marine	28	16	18	34	Experiment	NA	Ilan, Taiwan	Arthropoda	Malacostraca	Marsupenaeus japonicus	euryhaline	haemolymph	body fluid	1	4	6	6	Control-Impacted (CI)			Ammonia	0.2479	0.0489898	0.4021	0.122474	Standard Error	No	gradual (2-3 ppt/day)
205	Lee & Chen 2003	marine	28	16	18	34	Experiment	NA	Ilan, Taiwan	Arthropoda	Malacostraca	Marsupenaeus japonicus	euryhaline	haemolymph	body fluid	1	4	6	6	Control-Impacted (CI)			Urea	0.8566	0.440908	1.818	1.10227	Standard Error	No	gradual (2-3 ppt/day)
206	Lee & Chen 2003	marine	28	16	18	34	Experiment	NA	Ilan, Taiwan	Arthropoda	Malacostraca	Marsupenaeus japonicus	euryhaline	haemolymph	body fluid	1	4	6	6	Control-Impacted (CI)			Uric Acid	0	0	0.022	0.0244949	Standard Error	No	gradual (2-3 ppt/day)
207	Lin et al. 2016	marine	28	10	10	20	Experiment	artificial	Taiwan	Mollusca	Bivalvia	Meretrix lusoria	euryhaline	gills	tissue	1	3	8	8	Control-Impacted (CI)			Alanine	0.432	1.41421	0.9698	0.565685	Standard Error	No	unknown
208	Lin et al. 2016	marine	28	10	10	20	Experiment	artificial	Taiwan	Mollusca	Bivalvia	Meretrix lusoria	euryhaline	mantle	tissue	1	3	8	8	Control-Impacted (CI)			Alanine	0.47	0	0.6083	1.41421	Standard Error	No	unknown
209	Lin et al. 2016	marine	28	10	10	20	Experiment	artificial	Taiwan	Mollusca	Bivalvia	Meretrix lusoria	euryhaline	gills	tissue	1	3	8	8	Control-Impacted (CI)			Arginine	0.1246	0	0.09903	0	Standard Error	No	unknown
210	Lin et al. 2016	marine	28	10	10	20	Experiment	artificial	Taiwan	Mollusca	Bivalvia	Meretrix lusoria	euryhaline	mantle	tissue	1	3	8	8	Control-Impacted (CI)			Arginine	0.4392	0	0.3316	0	Standard Error	No	unknown
211	Lin et al. 2016	marine	28	10	10	20	Experiment	artificial	Taiwan	Mollusca	Bivalvia	Meretrix lusoria	euryhaline	gills	tissue	1	3	8	8	Control-Impacted (CI)			Aspartate	0.2527	0	0.2271	0	Standard Error	No	unknown
212	Lin et al. 2016	marine	28	10	10	20	Experiment	artificial	Taiwan	Mollusca	Bivalvia	Meretrix lusoria	euryhaline	mantle	tissue	1	3	8	8	Control-Impacted (CI)			Aspartate	0.2548	0	0.2394	0	Standard Error	No	unknown
213	Lin et al. 2016	marine	28	10	10	20	Experiment	artificial	Okazaki,Japan	Mollusca	Bivalvia	Meretrix lusoria	euryhaline	hemolymph	body fluid	1	3	8	8	Control-Impacted (CI)			Chloride	175.4	19.799	330.4	19.799	Standard Error	No	unknown
214	Lin et al. 2016	marine	28	10	10	20	Experiment	artificial	Taiwan	Mollusca	Bivalvia	Meretrix lusoria	euryhaline	gills	tissue	1	3	8	8	Control-Impacted (CI)			Glutamate	0.432	0	0.7905	0.282843	Standard Error	No	unknown
215	Lin et al. 2016	marine	28	10	10	20	Experiment	artificial	Taiwan	Mollusca	Bivalvia	Meretrix lusoria	euryhaline	mantle	tissue	1	3	8	8	Control-Impacted (CI)			Glutamate	0.593	0.282843	0.6545	0.282843	Standard Error	No	unknown
216	Lin et al. 2016	marine	28	10	10	20	Experiment	artificial	Taiwan	Mollusca	Bivalvia	Meretrix lusoria	euryhaline	gills	tissue	1	3	8	8	Control-Impacted (CI)			Glycine	0.1246	0	0.1759	0	Standard Error	No	unknown
217	Lin et al. 2016	marine	28	10	10	20	Experiment	artificial	Taiwan	Mollusca	Bivalvia	Meretrix lusoria	euryhaline	mantle	tissue	1	3	8	8	Control-Impacted (CI)			Glycine	0.02419	0	0.08568	0.282843	Standard Error	No	unknown
218	Lin et al. 2016	marine	28	10	10	20	Experiment	artificial	Okazaki,Japan	Mollusca	Bivalvia	Meretrix lusoria	euryhaline	hemolymph	body fluid	1	3	8	8	Control-Impacted (CI)			Sodium	90.7	8.48528	234.9	39.598	Standard Error	No	unknown
219	Lin et al. 2016	marine	28	10	10	20	Experiment	artificial	Taiwan	Mollusca	Bivalvia	Meretrix lusoria	euryhaline	gills	tissue	1	3	8	8	Control-Impacted (CI)			Taurine	3.761	0.565685	10.04	0.565685	Standard Error	No	unknown
220	Lin et al. 2016	marine	28	10	10	20	Experiment	artificial	Taiwan	Mollusca	Bivalvia	Meretrix lusoria	euryhaline	mantle	tissue	1	3	8	8	Control-Impacted (CI)			Taurine	3.16	0.565685	3.36	0.848528	Standard Error	No	unknown
221	Lin et al. 2016	marine	28	10	10	20	Experiment	artificial	Taiwan	Mollusca	Bivalvia	Meretrix lusoria	euryhaline	gills	tissue	1	3	8	8	Control-Impacted (CI)			Total Organics	12.02	2.82843	25.83	8.48528	Standard Error	No	unknown
222	Lin et al. 2016	marine	28	10	10	20	Experiment	artificial	Taiwan	Mollusca	Bivalvia	Meretrix lusoria	euryhaline	mantle	tissue	1	3	8	8	Control-Impacted (CI)			Total Organics	15.1	4.24264	22.24	8.48528	Standard Error	No	unknown
223	Lin et al. 2016	marine	28	10	10	20	Experiment	artificial	Okazaki,Japan	Mollusca	Bivalvia	Meretrix lusoria	euryhaline	hemolymph	body fluid	1	3	8	8	Control-Impacted (CI)			Total Osmolality	224.4	28.2843	511.4	31.1127	Standard Error	No	unknown
224	Livingstone et al. 1979	marine	21	15	15	30	Experiment	NA	NA	Mollusca	Bivalvia	Mytilus edulis	euryhaline	whole body	tissue	1	2	5	5	Control-Impacted (CI)			Alanine	13.2744	13.4164	31.8921	11.1803	Standard Error	No	acute	Error bars smaller than data points
225	Livingstone et al. 1979	marine	21	15	15	30	Experiment	NA	NA	Mollusca	Bivalvia	Mytilus edulis	euryhaline	whole body	tissue	1	2	5	5	Control-Impacted (CI)			Ammonium	38.0952	4.47214	20.9977	6.7082	Standard Error	No	acute	Error bars smaller than data points
226	Livingstone et al. 1979	marine	21	15	15	30	Experiment	NA	NA	Mollusca	Bivalvia	Mytilus edulis	euryhaline	whole body	tissue	1	2	5	5	Control-Impacted (CI)			Arginine	34.2235	20.1246	18.0258	6.7082	Standard Error	No	acute	Error bars smaller than data points
227	Livingstone et al. 1979	marine	21	15	15	30	Experiment	NA	NA	Mollusca	Bivalvia	Mytilus edulis	euryhaline	whole body	tissue	1	2	5	5	Control-Impacted (CI)			Aspartate	34.191	2.23607	30.0289	4.47214	Standard Error	No	acute	Error bars smaller than data points
228	Livingstone et al. 1979	marine	21	15	15	30	Experiment	NA	NA	Mollusca	Bivalvia	Mytilus edulis	euryhaline	whole body	tissue	1	2	5	5	Control-Impacted (CI)			Glutamate	15.11	3.3541	16.6071	6.7082	Standard Error	No	acute	Error bars smaller than data points
229	Livingstone et al. 1979	marine	21	15	15	30	Experiment	NA	NA	Mollusca	Bivalvia	Mytilus edulis	euryhaline	whole body	tissue	1	2	5	5	Control-Impacted (CI)			Glycine	6.57895	4.47214	79.7686	11.1803	Standard Error	No	acute	Error bars smaller than data points
230	Livingstone et al. 1979	marine	21	15	15	30	Experiment	NA	NA	Mollusca	Bivalvia	Mytilus edulis	euryhaline	whole body	tissue	1	2	5	5	Control-Impacted (CI)			Others	88.6574	20.1246	73.6971	13.4164	Standard Error	No	acute	Error bars smaller than data points
231	Livingstone et al. 1979	marine	21	15	15	30	Experiment	NA	NA	Mollusca	Bivalvia	Mytilus edulis	euryhaline	whole body	tissue	1	2	5	5	Control-Impacted (CI)			Proline	18.4211	6.7082	8.78438	2.23607	Standard Error	No	acute	Error bars smaller than data points
232	Livingstone et al. 1979	marine	21	15	15	30	Experiment	NA	NA	Mollusca	Bivalvia	Mytilus edulis	euryhaline	whole body	tissue	1	2	5	5	Control-Impacted (CI)			Taurine	191.714	13.4164	251.423	20.1246	Standard Error	No	acute	Error bars smaller than data points
233	Livingstone et al. 1979	marine	14	15	15	30	Experiment	NA	NA	Mollusca	Bivalvia	Mytilus edulis	euryhaline	adductor muscle	tissue	1	2	5	5	Control-Impacted (CI)			Total Organics	312.165	36.8951	434.53	36.8951	Standard Error	No	acute	Error bars smaller than data points
234	Livingstone et al. 1979	marine	21	15	15	30	Experiment	NA	NA	Mollusca	Bivalvia	Mytilus edulis	euryhaline	whole body	tissue	1	2	5	5	Control-Impacted (CI)			Total Organics	371.345	50.3115	517.613	119.63	Standard Error	No	acute	Error bars smaller than data points
235	Livingstone et al. 1979	marine	14	15	15	30	Experiment	NA	NA	Mollusca	Bivalvia	Mytilus edulis	euryhaline	haemolymph	body fluid	1	2	5	5	Control-Impacted (CI)			Total Osmolality	442.736	52.5476	847.368	52.5476	Standard Error	No	acute	Error bars smaller than data points
236	Lucu & Devescovi 1999	marine	15	18	20	38	Experiment	natural	Rovinj, Croatia	Arthropoda	Malacostraca	Homarus gammarus	stenohaline	hemolymph	body fluid	1	2	6	6	Control-Impacted (CI)			Chloride	353	7	584	14	Standard Deviation	No	acute	Replicates 6 = 6-7
237	Lucu & Devescovi 1999	marine	15	18	20	38	Experiment	natural	Rovinj, Croatia	Arthropoda	Malacostraca	Homarus gammarus	stenohaline	hemolymph	body fluid	1	2	6	10	Control-Impacted (CI)			Sodium	330	20	490	24	Standard Deviation	No	acute	Replicates 6 = 6-7
238	Lucu & Devescovi 1999	marine	15	18	20	38	Experiment	natural	Rovinj, Croatia	Arthropoda	Malacostraca	Homarus gammarus	stenohaline	hemolymph	body fluid	1	2	6	10	Control-Impacted (CI)			Total Osmolality	834	0	1266	28	Standard Deviation	No	acute	Replicates 6 = 6-7
239	Lucu et al. 2000	marine	16	18	20	38	Experiment	natural	Rovinj, Croatia	Arthropoda	Malacostraca	Palinurus elephas	stenohaline	hemolymph	body fluid	1	2	5	5	Before-After (BA)			Calcium	9.379	0.5	12.5	1	Standard Deviation	No	gradual (2ppt/2days)	Replicates 5-7
240	Lucu et al. 2000	marine	16	18	20	38	Experiment	natural	Rovinj, Croatia	Arthropoda	Malacostraca	Palinurus elephas	stenohaline	hemolymph	body fluid	1	2	5	5	Before-After (BA)			Chloride	307.3	8	546.798	16	Standard Deviation	No	gradual (2ppt/2days)	Replicates 5-7
241	Lucu et al. 2000	marine	16	18	20	38	Experiment	natural	Rovinj, Croatia	Arthropoda	Malacostraca	Palinurus elephas	stenohaline	hemolymph	body fluid	1	2	5	5	Before-After (BA)			Magnesium	17.67	1	34.2	3	Standard Deviation	No	gradual (2ppt/2days)	Replicates 5-7
242	Lucu et al. 2000	marine	16	18	20	38	Experiment	natural	Rovinj, Croatia	Arthropoda	Malacostraca	Palinurus elephas	stenohaline	hemolymph	body fluid	1	2	5	5	Before-After (BA)			Sodium	254	19	470.443	17	Standard Deviation	No	gradual (2ppt/2days)	Replicates 5-7
243	Lucu et al. 2000	marine	16	18	20	38	Experiment	natural	Rovinj, Croatia	Arthropoda	Malacostraca	Palinurus elephas	stenohaline	hemolymph	body fluid	1	2	5	5	Before-After (BA)			Total Osmolality	687	8	1191	28	Standard Deviation	No	gradual (2ppt/2days)	Replicates 5-7
244	Lynch & Wood 1966	marine	in situ	23.3	3.4	26.7	in situ	natural	Virginia, USA	Mollusca	Bivalvia	Crassostrea virginica	euryhaline	adductor muscle	tissue	1	6	4	4	Control-Impacted (CI)			Alanine	0.557	0.057	1.535	0.14	Standard Deviation	No	NA
245	Lynch & Wood 1966	marine	in situ	23.3	3.4	26.7	in situ	natural	Virginia, USA	Mollusca	Bivalvia	Crassostrea virginica	euryhaline	adductor muscle	tissue	1	6	4	4	Control-Impacted (CI)			Ammonia	0.073	0.016	0.1	0.035	Standard Deviation	No	NA
246	Lynch & Wood 1966	marine	in situ	23.3	3.4	26.7	in situ	natural	Virginia, USA	Mollusca	Bivalvia	Crassostrea virginica	euryhaline	adductor muscle	tissue	1	6	4	4	Control-Impacted (CI)			Arginine	0.159	0.081	0.198	0.043	Standard Deviation	No	NA
247	Lynch & Wood 1966	marine	in situ	23.3	3.4	26.7	in situ	natural	Virginia, USA	Mollusca	Bivalvia	Crassostrea virginica	euryhaline	adductor muscle	tissue	1	6	4	4	Control-Impacted (CI)			Aspartate	0.037	0.023	0.065	0.038	Standard Deviation	No	NA
248	Lynch & Wood 1966	marine	in situ	23.3	3.4	26.7	in situ	natural	Virginia, USA	Mollusca	Bivalvia	Crassostrea virginica	euryhaline	adductor muscle	tissue	1	6	4	4	Control-Impacted (CI)			Cysteic acid	0.004	0.005	0.008	0.015	Standard Deviation	No	NA
249	Lynch & Wood 1966	marine	in situ	23.3	3.4	26.7	in situ	natural	Virginia, USA	Mollusca	Bivalvia	Crassostrea virginica	euryhaline	adductor muscle	tissue	1	6	4	4	Control-Impacted (CI)			Cystine	0	0	0.006	0.01	Standard Deviation	No	NA
250	Lynch & Wood 1966	marine	in situ	23.3	3.4	26.7	in situ	natural	Virginia, USA	Mollusca	Bivalvia	Crassostrea virginica	euryhaline	adductor muscle	tissue	1	6	4	4	Control-Impacted (CI)			Glutamate	0.193	0.015	0.345	0.039	Standard Deviation	No	NA
251	Lynch & Wood 1966	marine	in situ	23.3	3.4	26.7	in situ	natural	Virginia, USA	Mollusca	Bivalvia	Crassostrea virginica	euryhaline	adductor muscle	tissue	1	6	4	4	Control-Impacted (CI)			Glycine	0.048	0.017	1.062	0.349	Standard Deviation	No	NA
252	Lynch & Wood 1966	marine	in situ	23.3	3.4	26.7	in situ	natural	Virginia, USA	Mollusca	Bivalvia	Crassostrea virginica	euryhaline	adductor muscle	tissue	1	6	4	4	Control-Impacted (CI)			Histidine	0.18	0.04	0.089	0.021	Standard Deviation	No	NA
253	Lynch & Wood 1966	marine	in situ	23.3	3.4	26.7	in situ	natural	Virginia, USA	Mollusca	Bivalvia	Crassostrea virginica	euryhaline	adductor muscle	tissue	1	6	4	4	Control-Impacted (CI)			Isoleucine	0.003	0.002	0.001	0.004	Standard Deviation	No	NA
254	Lynch & Wood 1966	marine	in situ	23.3	3.4	26.7	in situ	natural	Virginia, USA	Mollusca	Bivalvia	Crassostrea virginica	euryhaline	adductor muscle	tissue	1	6	4	4	Control-Impacted (CI)			Leucine	0.005	0.002	0.014	0.007	Standard Deviation	No	NA
255	Lynch & Wood 1966	marine	in situ	23.3	3.4	26.7	in situ	natural	Virginia, USA	Mollusca	Bivalvia	Crassostrea virginica	euryhaline	adductor muscle	tissue	1	6	4	4	Control-Impacted (CI)			Lysine	0.008	0.002	0.028	0.021	Standard Deviation	No	NA
256	Lynch & Wood 1966	marine	in situ	23.3	3.4	26.7	in situ	natural	Virginia, USA	Mollusca	Bivalvia	Crassostrea virginica	euryhaline	adductor muscle	tissue	1	6	4	4	Control-Impacted (CI)			Methionine	0	0	0.004	0.005	Standard Deviation	No	NA
257	Lynch & Wood 1966	marine	in situ	23.3	3.4	26.7	in situ	natural	Virginia, USA	Mollusca	Bivalvia	Crassostrea virginica	euryhaline	adductor muscle	tissue	1	6	4	4	Control-Impacted (CI)			Ornithine	0.042	0.012	0.055	0.007	Standard Deviation	No	NA
258	Lynch & Wood 1966	marine	in situ	23.3	3.4	26.7	in situ	natural	Virginia, USA	Mollusca	Bivalvia	Crassostrea virginica	euryhaline	adductor muscle	tissue	1	6	4	4	Control-Impacted (CI)			Phenylalanine	0.006	0.002	0.033	0.027	Standard Deviation	No	NA
259	Lynch & Wood 1966	marine	in situ	23.3	3.4	26.7	in situ	natural	Virginia, USA	Mollusca	Bivalvia	Crassostrea virginica	euryhaline	adductor muscle	tissue	1	6	4	4	Control-Impacted (CI)			Proline	0.02	0.005	0.582	0.335	Standard Deviation	No	NA
260	Lynch & Wood 1966	marine	in situ	23.3	3.4	26.7	in situ	natural	Virginia, USA	Mollusca	Bivalvia	Crassostrea virginica	euryhaline	adductor muscle	tissue	1	6	4	4	Control-Impacted (CI)			Serine	0.023	0.008	0.03	0.007	Standard Deviation	No	NA
261	Lynch & Wood 1966	marine	in situ	23.3	3.4	26.7	in situ	natural	Virginia, USA	Mollusca	Bivalvia	Crassostrea virginica	euryhaline	adductor muscle	tissue	1	6	4	4	Control-Impacted (CI)			Taurine	0.196	0.097	2.448	0.496	Standard Deviation	No	NA
262	Lynch & Wood 1966	marine	in situ	23.3	3.4	26.7	in situ	natural	Virginia, USA	Mollusca	Bivalvia	Crassostrea virginica	euryhaline	adductor muscle	tissue	1	6	4	4	Control-Impacted (CI)			Threonine	0.009	0.003	0.025	0.005	Standard Deviation	No	NA
263	Lynch & Wood 1966	marine	in situ	23.3	3.4	26.7	in situ	natural	Virginia, USA	Mollusca	Bivalvia	Crassostrea virginica	euryhaline	adductor muscle	tissue	1	6	4	4	Control-Impacted (CI)			Tyrosine	0.006	0.007	0.039	0.038	Standard Deviation	No	NA
264	Lynch & Wood 1966	marine	in situ	23.3	3.4	26.7	in situ	natural	Virginia, USA	Mollusca	Bivalvia	Crassostrea virginica	euryhaline	adductor muscle	tissue	1	6	4	4	Control-Impacted (CI)			Valine	0.004	0.003	0.018	0.007	Standard Deviation	No	NA
265	Natochin et al. 1978	marine	14	16.8	10	26.8	Experiment	NA	Kandalaksha Bay, White Sea	Mollusca	Bivalvia	Mytilus edulis	euryhaline	muscle	tissue	1	2	8	8	Control-Impacted (CI)			Potassium	43.66	4	74.15	1	Standard Deviation	No (only measured for short-term acclimation)	acute	Replicates 8 -10
266	Natochin et al. 1978	marine	14	16.8	10	26.8	Experiment	NA	Kandalaksha Bay, White Sea	Mollusca	Bivalvia	Mytilus edulis	euryhaline	muscle	tissue	1	2	8	8	Control-Impacted (CI)			Sodium	46.61	7	113.6	3	Standard Deviation	No (only measured for short-term acclimation)	acute	Replicates 8 -10
267	Neufeld & Wright 1996a	marine	28	13	20	33	Experiment	artificial	Bodega Bay Marine Laboratory / Oregon State University, USA	Mollusca	Bivalvia	Mytilus californianus	euryhaline	gills	tissue	1	2	5	5	Control-Impacted (CI)			Betaine	141.8	38.0132	226.8	51.4296	Standard Error	Yes	unknown	n = 5 -7
268	Neufeld & Wright 1996a	marine	28	13	20	33	Experiment	artificial	Bodega Bay, CA, USA	Mollusca	Bivalvia	Mytilus californianus	euryhaline	gills	tissue	1	2	5	5	Control-Impacted (CI)			Potassium	257.8	17.8885	229	46.9574	Standard Error	Yes	unknown	Replicates 5-7
269	Neufeld & Wright 1996a	marine	28	13	20	33	Experiment	artificial	Bodega Bay Marine Laboratory / Oregon State University, USA	Mollusca	Bivalvia	Mytilus californianus	euryhaline	gills	tissue	1	2	5	5	Control-Impacted (CI)			Taurine	401.8	145.344	395.2	102.859	Standard Error	Yes	unknown	n = 5 -7
270	Neufeld & Wright 1996b	marine	21	13	20	33	Experiment	artificial	Whitney Laboratory, Florida, USA	Mollusca	Bivalvia	Geukensia demissa	euryhaline	gills	tissue	1	2	3	3	Control-Impacted (CI)			Alanine	14.1	6.23538	31.2	10.7387	Standard Error	Yes	unknown	n = 3-8
271	Neufeld & Wright 1996b	marine	21	13	20	33	Experiment	artificial	Whitney Laboratory, Florida, USA	Mollusca	Bivalvia	Geukensia demissa	euryhaline	mantle	tissue	1	2	5	6	Control-Impacted (CI)			Alanine	10.32	6.7082	21.99	12.2474	Standard Error	Yes	unknown	n = 5-6 // Levels of GABA, aspartate, cystine, glutamate, ornithine and serine were all 5.0 mmol g-1 dry mass or less and together constituted an additional 53±9 mmol g-1 dry mass in the mantle tissue.
272	Neufeld & Wright 1996b	marine	21	13	20	33	Experiment	artificial	Whitney Laboratory, Florida, USA	Mollusca	Bivalvia	Geukensia demissa	euryhaline	gills	tissue	1	2	3	3	Control-Impacted (CI)			Aspartate	5.4	3.4641	19.4	7.79423	Standard Error	Yes	unknown	n = 3-8
273	Neufeld & Wright 1996b	marine	21	13	20	33	Experiment	artificial	Whitney Laboratory, Florida, USA	Mollusca	Bivalvia	Geukensia demissa	euryhaline	mantle	tissue	1	2	5	6	Control-Impacted (CI)			Betaine	132.8	17.8885	162.9	46.5403	Standard Error	Yes	unknown	n = 3-8
274	Neufeld & Wright 1996b	marine	21	13	20	33	Experiment	artificial	Whitney Laboratory, Florida, USA	Mollusca	Bivalvia	Geukensia demissa	euryhaline	gills	tissue	1	2	3	3	Control-Impacted (CI)			Glutamate	6.7	4.67654	15.6	5.36936	Standard Error	Yes	unknown	n = 3-8
275	Neufeld & Wright 1996b	marine	21	13	20	33	Experiment	artificial	Whitney Laboratory, Florida, USA	Mollusca	Bivalvia	Geukensia demissa	euryhaline	gills	tissue	1	2	3	3	Control-Impacted (CI)			Glycine	7.7	2.77128	36.4	10.2191	Standard Error	Yes	unknown	n = 3-8
276	Neufeld & Wright 1996b	marine	21	13	20	33	Experiment	artificial	Whitney Laboratory, Florida, USA	Mollusca	Bivalvia	Geukensia demissa	euryhaline	mantle	tissue	1	2	5	6	Control-Impacted (CI)			Glycine	5.833	2.23607	18.4	12.2474	Standard Error	Yes	unknown	n = 5-6
277	Neufeld & Wright 1996b	marine	21	13	20	33	Experiment	artificial	Whitney Laboratory, Florida, USA	Mollusca	Bivalvia	Geukensia demissa	euryhaline	gills	tissue	1	2	3	3	Control-Impacted (CI)			Ornithine	2.3	0.34641	4.8	2.07846	Standard Error	Yes	unknown	n = 3-8
278	Neufeld & Wright 1996b	marine	21	13	20	33	Experiment	artificial	Whitney Laboratory, Florida, USA	Mollusca	Bivalvia	Geukensia demissa	euryhaline	gills	tissue	1	2	3	3	Control-Impacted (CI)			Phosphoserine	1.6	0.519615	1.6	0.69282	Standard Error	Yes	unknown	n = 3-8
279	Neufeld & Wright 1996b	estuarine	21	13	20	33	Experiment	artificial	St Augustine, FL, USA	Mollusca	Bivalvia	Geukensia demissa	euryhaline	gills	tissue	1	2	3	3	Control-Impacted (CI)			Potassium	231.3	27.7128	284	17.3205	Standard Error	Yes	unknown	Replicates 3-8
280	Neufeld & Wright 1996b	marine	21	13	20	33	Experiment	artificial	Whitney Laboratory, Florida, USA	Mollusca	Bivalvia	Geukensia demissa	euryhaline	gills	tissue	1	2	3	3	Control-Impacted (CI)			Serine	1.5	0.519615	4	1.55885	Standard Error	Yes	unknown	n = 3-8
281	Neufeld & Wright 1996b	marine	21	13	20	33	Experiment	artificial	Whitney Laboratory, Florida, USA	Mollusca	Bivalvia	Geukensia demissa	euryhaline	gills	tissue	1	2	3	3	Control-Impacted (CI)			Taurine	127.4	32.3894	234.5	31.3501	Standard Error	Yes	unknown	n = 3-8
282	Neufeld & Wright 1996b	marine	21	13	20	33	Experiment	artificial	Whitney Laboratory, Florida, USA	Mollusca	Bivalvia	Geukensia demissa	euryhaline	mantle	tissue	1	2	5	6	Control-Impacted (CI)			Taurine	76.73	29.0689	107.2	31.8434	Standard Error	Yes	unknown	n = 5-6
283	Neufeld & Wright 1996b	marine	21	13	20	33	Experiment	artificial	Whitney Laboratory, Florida, USA	Mollusca	Bivalvia	Geukensia demissa	euryhaline	gills	tissue	1	2	3	3	Control-Impacted (CI)			Threonine	0.9	0.519615	1.2	0.69282	Standard Error	Yes	unknown	n = 3-8
284	Neufeld & Wright 1996b	marine	21	13	20	33	Experiment	artificial	Whitney Laboratory, Florida, USA	Mollusca	Bivalvia	Geukensia demissa	euryhaline	gills	tissue	1	2	3	3	Control-Impacted (CI)			γ-Aminoisobuytric acid	1.7	2.42487	3.4	2.77128	Standard Error	Yes	unknown	n = 3-8
285	Neufeld & Wright 1998	marine	21	13	20	33	Experiment	artificial	Whitney Laboratory, Florida, USA	Mollusca	Bivalvia	Geukensia demissa	euryhaline	gills	tissue	1	2	3	3	Control-Impacted (CI)			Alanine	6.5	1.21244	10.2	2.25167	Standard Error	Yes	unknown	n = 3-5
286	Neufeld & Wright 1998	marine	21	13	20	33	Experiment	artificial	Whitney Laboratory, Florida, USA	Mollusca	Bivalvia	Geukensia demissa	euryhaline	gills	tissue	1	2	3	3	Control-Impacted (CI)			Betaine	162.2	48.8438	644.3	298.606	Standard Error	Yes	unknown	n = 3-5
287	Neufeld & Wright 1998	marine	21	13	20	33	Experiment	artificial	Whitney Laboratory, Florida, USA	Mollusca	Bivalvia	Geukensia demissa	euryhaline	gills	tissue	1	2	3	3	Control-Impacted (CI)			Glutamate	11.5	2.42487	9.1	1.73205	Standard Error	Yes	unknown	n = 3-5
288	Neufeld & Wright 1998	marine	21	13	20	33	Experiment	artificial	Whitney Laboratory, Florida, USA	Mollusca	Bivalvia	Geukensia demissa	euryhaline	gills	tissue	1	2	3	3	Control-Impacted (CI)			Glycine	5.8	2.42487	31.1	9.00666	Standard Error	Yes	unknown	n = 3-5
289	Neufeld & Wright 1998	marine	21	13	20	33	Experiment	artificial	Whitney Laboratory, Florida, USA	Mollusca	Bivalvia	Geukensia demissa	euryhaline	gills	tissue	1	2	3	3	Control-Impacted (CI)			Others	21.4	3.5	8.6	4.7	Standard Error	Yes	unknown	n = 3-5 // Includes phosphoserine, phosphoethanolamine, threonine, serine, g-aminobutyric acid and ornithine.
290	Neufeld & Wright 1998	estuarine	21	13	20	33	Experiment	artificial	St Augustine, FL, USA	Mollusca	Bivalvia	Geukensia demissa	euryhaline	gills	tissue	1	2	3	3	Control-Impacted (CI)			Potassium	120.4	13.3368	128.7	11.0851	Standard Error	Yes	unknown	Replicates 3-5
291	Neufeld & Wright 1998	marine	21	13	20	33	Experiment	artificial	Whitney Laboratory, Florida, USA	Mollusca	Bivalvia	Geukensia demissa	euryhaline	gills	tissue	1	2	3	3	Control-Impacted (CI)			Taurine	178.7	19.5722	240.5	1.03923	Standard Error	Yes	unknown	n = 3-5
292	Neufeld & Wright 1998	marine	21	13	20	33	Experiment	artificial	Whitney Laboratory, Florida, USA	Mollusca	Bivalvia	Geukensia demissa	euryhaline	gills	tissue	1	2	3	3	Control-Impacted (CI)			Total Organics	506.5	75.8638	1072.5	314.54	Standard Error	Yes	unknown	n = 3-5
293	Neufeld & Wright 1998	marine	21	13	20	33	Experiment	artificial	Whitney Laboratory, Florida, USA	Mollusca	Bivalvia	Geukensia demissa	euryhaline	hemolymph	body fluid	1	2	3	3	Control-Impacted (CI)			Total Osmolality	559.7	25.9808	933.5	22.5167	Standard Error	No	unknown	n = 3-6
294	Neufeld & Wright 1998	marine	21	13	20	33	Experiment	artificial	Whitney Laboratory, Florida, USA	Mollusca	Bivalvia	Geukensia demissa	euryhaline	mantle cavity fluid	body fluid	1	2	3	3	Control-Impacted (CI)			Total Osmolality	590.5	51.9615	915.5	22.5167	Standard Error	No	unknown	n = 3-6
295	Oglesby 1968	marine	17	21.5	13.1	34.6	Experiment	artificial	Boiler Bay, Oregon, USA	Sipuncula	Sipunculida	Themiste dycritum	stenohaline	coelomic fluid	body fluid	1	13	10	10	Control-Impacted (CI)			Chloride	204.574	9.087	530.145	18.144	Standard Deviation	No	unkown	Multiple experiments run with only 1 salinity treatment each and no control; thus 100%SW taken as control and lowest salinity treatment / also each treatment had a different acclimation time
296	Oglesby 1968	marine	17	21.5	13.1	34.6	Experiment	artificial	Boiler Bay, Oregon, USA	Sipuncula	Sipunculida	Themiste dycritum	stenohaline	coelomic fluid	body fluid	1	13	10	10	Control-Impacted (CI)			Total Osmolality	387.772	38	970.848	34	Standard Deviation	No	unkown	Multiple experiments run with only 1 salinity treatment each and no control; thus 100%SW taken as control and lowest salinity treatment / also each treatment had a different acclimation time
297	Paynter et al. 1995	marine	70	8			in situ	natural	Chesapeake Bay, Maryland, USA	Mollusca	Bivalvia	Crassostrea virginica	euryhaline	gills	tissue	1	2	5	5	Control-Impacted (CI)	Parasitic infection		Glycine	27.17	15.6525	60.44	8.94427	Standard Error	no	NA
298	Paynter et al. 1995	marine	70	8			in situ	natural	Chesapeake Bay, Maryland, USA	Mollusca	Bivalvia	Crassostrea virginica	euryhaline	gills	tissue	1	2	5	5	Control-Impacted (CI)	Parasitic infection		Taurine	74.91	31.305	219.7	20.1246	Standard Error	no	NA
299	Paynter et al. 1995	marine	70	8			in situ	natural	Chesapeake Bay, Maryland, USA	Mollusca	Bivalvia	Crassostrea virginica	euryhaline	gills	tissue	1	2	5	5	Control-Impacted (CI)	Parasitic infection		Total Organics	302.8	58.1378	426.4	26.8328	Standard Error	no	NA
300	Pierce 1970	marine	14	32	8	40	Experiment	artificial	Penzance Point, Massachusetts, USA	Mollusca	Bivalvia	Geukensia demissus demissus	euryhaline	blood	body fluid	4	6	4	4	Regression-like			Total Osmolality	248	1.2644	1284	1.12583	Standard Error	No	acute	n = 12-24; but 3 animals pooled
301	Pierce 1970	marine	14	32	8	40	Experiment	artificial	Penzance Point, Massachusetts, USA	Mollusca	Bivalvia	Geukensia demissus demissus	euryhaline	mantle fluid	body fluid	4	6	4	4	Regression-like			Total Osmolality	254	0.987269	1291	0.883346	Standard Error	No	acute	n = 12-24; but 3 animals pooled
302	Pierce 1970	marine	14	32	8	40	Experiment	artificial	Penzance Point, Massachusetts, USA	Mollusca	Bivalvia	Geukensia demissus demissus	euryhaline	pericardial fluid	body fluid	4	6	4	4	Regression-like			Total Osmolality	259	0.710141	1302	2.44219	Standard Error	No	acute	n = 12-24; but 3 animals pooled
303	Pierce 1970	marine	14	41	3	44	Experiment	artificial	Alligator Point, Florida, USA	Mollusca	Bivalvia	Geukensia demissus granosissimus	euryhaline	blood	body fluid	4	7	6	6	Regression-like			Total Osmolality	115	1.9399	1351	1.74937	Standard Error	No	acute	n = 6-8
304	Pierce 1970	marine	14	41	3	44	Experiment	artificial	Alligator Point, Florida, USA	Mollusca	Bivalvia	Geukensia demissus granosissimus	euryhaline	mantle fluid	body fluid	4	7	6	6	Regression-like			Total Osmolality	120	2.1131	1361	3.42946	Standard Error	No	acute	n = 6-8
305	Pierce 1970	marine	14	41	3	44	Experiment	artificial	Alligator Point, Florida, USA	Mollusca	Bivalvia	Geukensia demissus granosissimus	euryhaline	pericardial fluid	body fluid	4	7	6	6	Regression-like			Total Osmolality	132	2.84056	1377	1.95722	Standard Error	No	acute	n = 6-8
306	Pierce 1970											Modiolus modiolus		mantle_fluid	body fluid			4	4				Total Osmolality	720	0.71	1081	1.48	Standard Error	No	acute	n = 12-24; but 3 animals pooled
307	Pierce 1970											Modiolus modiolus		body_fluid	body fluid			4	4				Total Osmolality	724	0.4	1083	0.51	Standard Error	No	acute	n = 12-24; but 3 animals pooled
308	Pierce 1970											Modiolus modiolus		blood	body fluid			4	4				Total Osmolality	727	0.61	1092	1.8	Standard Error	No	acute	n = 12-24; but 3 animals pooled
309	Pierce 1970											Modiolus squamosus		mantle_fluid	body fluid			6	6				Total Osmolality	725	0.41	1106	0.57	Standard Error	No	acute	n = 6-8
310	Pierce 1970											Modiolus squamosus		body_fluid	body fluid			6	6				Total Osmolality	731	0.37	1117	1.61	Standard Error	No	acute	n = 6-8
311	Pierce 1970											Modiolus squamosus		blood	body fluid			6	6				Total Osmolality	738	1.5	1128	2.6	Standard Error	No	acute	n = 6-8
312	Pierce 1971	marine	21	45	3	48	Experiment	artificial	Alligator Point, Florida, USA	Mollusca	Bivalvia	Geukensia demissus granosissimus	euryhaline	blood	body fluid	2	4-7	12	12	Regression-like			Calcium	2.608	0.1	13.38	0.1	Standard Deviation	No	unknown
313	Pierce 1971	marine	21	45	3	48	Experiment	artificial	Alligator Point, Florida, USA	Mollusca	Bivalvia	Geukensia demissus granosissimus	euryhaline	pericardial fluid	body fluid	2	4-7	12	12	Regression-like			Calcium	3.442	0.1	13.69	0.1	Standard Deviation	No	unknown
314	Pierce 1971	marine	21	45	3	48	Experiment	artificial	Alligator Point, Florida, USA	Mollusca	Bivalvia	Geukensia demissus granosissimus	euryhaline	blood	body fluid	2	4-7	12	12	Regression-like			Chloride	85.77	9	954.8	9	Standard Deviation	No	unknown
315	Pierce 1971	marine	21	45	3	48	Experiment	artificial	Alligator Point, Florida, USA	Mollusca	Bivalvia	Geukensia demissus granosissimus	euryhaline	pericardial fluid	body fluid	2	4-7	12	12	Regression-like			Chloride	105.5	9	943.5	9	Standard Deviation	No	unknown
316	Pierce 1971	marine	21	45	3	48	Experiment	artificial	Alligator Point, Florida, USA	Mollusca	Bivalvia	Geukensia demissus granosissimus	euryhaline	blood	body fluid	2	4-7	12	12	Regression-like			Magnesium	5.905	0.5	48.76	0.5	Standard Deviation	No	unknown
317	Pierce 1971	marine	21	45	3	48	Experiment	artificial	Alligator Point, Florida, USA	Mollusca	Bivalvia	Geukensia demissus granosissimus	euryhaline	pericardial fluid	body fluid	2	4-7	12	12	Regression-like			Magnesium	7.261	0.5	53.23	0.5	Standard Deviation	No	unknown
318	Pierce 1971	marine	21	45	3	48	Experiment	artificial	Alligator Point, Florida, USA	Mollusca	Bivalvia	Geukensia demissus granosissimus	euryhaline	blood	body fluid	2	4-7	12	12	Regression-like			Potassium	8.201	0.2	31.11	0.2	Standard Deviation	No	unknown
319	Pierce 1971	marine	21	45	3	48	Experiment	artificial	Alligator Point, Florida, USA	Mollusca	Bivalvia	Geukensia demissus granosissimus	euryhaline	pericardial fluid	body fluid	2	4-7	12	12	Regression-like			Potassium	4.462	0.2	26.19	0.2	Standard Deviation	No	unknown
320	Pierce 1971	marine	21	45	3	48	Experiment	artificial	Alligator Point, Florida, USA	Mollusca	Bivalvia	Geukensia demissus granosissimus	euryhaline	blood	body fluid	2	4-7	12	12	Regression-like			Sodium	56.1	6	722.6	6	Standard Deviation	No	unknown
321	Pierce 1971	marine	21	45	3	48	Experiment	artificial	Alligator Point, Florida, USA	Mollusca	Bivalvia	Geukensia demissus granosissimus	euryhaline	pericardial fluid	body fluid	2	4-7	12	12	Regression-like			Sodium	74.24	6	706	6	Standard Deviation	No	unknown
322	Pierce 1971	marine	21	19	22	41	Experiment	artificial	Bay Mouth Bar, Florida, USA	Mollusca	Bivalvia	Modiolus squamosus	stenohaline	blood	body fluid	2	2-3	12	12	Regression-like			Calcium	6.66	0.1	10.21	0.1	Standard Deviation	No	unknown
323	Pierce 1971	marine	21	19	22	41	Experiment	artificial	Bay Mouth Bar, Florida, USA	Mollusca	Bivalvia	Modiolus squamosus	stenohaline	pericardial fluid	body fluid	2	2-3	12	12	Regression-like			Calcium	6.826	0.1	9.984	0.1	Standard Deviation	No	unknown
324	Pierce 1971	marine	21	19	22	41	Experiment	artificial	Bay Mouth Bar, Florida, USA	Mollusca	Bivalvia	Modiolus squamosus	stenohaline	blood	body fluid	2	2-3	12	12	Regression-like			Chloride	519.1	9	834.2	9	Standard Deviation	No	unknown
325	Pierce 1971	marine	21	19	22	41	Experiment	artificial	Bay Mouth Bar, Florida, USA	Mollusca	Bivalvia	Modiolus squamosus	stenohaline	pericardial fluid	body fluid	2	2-3	12	12	Regression-like			Chloride	504.6	9	861.6	9	Standard Deviation	No	unknown
326	Pierce 1971	marine	21	19	22	41	Experiment	artificial	Bay Mouth Bar, Florida, USA	Mollusca	Bivalvia	Modiolus squamosus	stenohaline	blood	body fluid	2	2-3	12	12	Regression-like			Magnesium	18.54	0.5	54.44	0.5	Standard Deviation	No	unknown
327	Pierce 1971	marine	21	19	22	41	Experiment	artificial	Bay Mouth Bar, Florida, USA	Mollusca	Bivalvia	Modiolus squamosus	stenohaline	pericardial fluid	body fluid	2	2-3	12	12	Regression-like			Magnesium	19.71	0.5	53.11	0.5	Standard Deviation	No	unknown
328	Pierce 1971	marine	21	19	22	41	Experiment	artificial	Bay Mouth Bar, Florida, USA	Mollusca	Bivalvia	Modiolus squamosus	stenohaline	blood	body fluid	2	2-3	12	12	Regression-like			Potassium	17.08	0.2	22.06	0.2	Standard Deviation	No	unknown
329	Pierce 1971	marine	21	19	22	41	Experiment	artificial	Bay Mouth Bar, Florida, USA	Mollusca	Bivalvia	Modiolus squamosus	stenohaline	pericardial fluid	body fluid	2	2-3	12	12	Regression-like			Potassium	14.11	0.2	19.38	0.2	Standard Deviation	No	unknown
330	Pierce 1971	marine	21	19	22	41	Experiment	artificial	Bay Mouth Bar, Florida, USA	Mollusca	Bivalvia	Modiolus squamosus	stenohaline	blood	body fluid	2	2-3	12	12	Regression-like			Sodium	384.1	6	618.3	6	Standard Deviation	No	unknown
331	Pierce 1971	marine	21	19	22	41	Experiment	artificial	Bay Mouth Bar, Florida, USA	Mollusca	Bivalvia	Modiolus squamosus	stenohaline	blood	body fluid	2	2-3	12	12	Regression-like			Sodium	367.4	6	560.9	6	Standard Deviation	No	unknown
332	Pierce et al. 1983	marine	14	34.3	3.1	37.4	Experiment	artificial	Martha's Vineyard, Massachusetts, USA	Mollusca	Gastropoda	Elysia chlorotica	euryhaline	body fluids	body fluid	1	10	5	5	Regression-like			Total Osmolality	145	20.1246	1445	71.5542	Standard Error	No	gradual (0.2-20 psu/2 weeks)
333	Pierce et al. 1984	marine	14	27	3	30	Experiment	NA	NA	Mollusca	Gastropoda	Elysia chlorotica	euryhaline	whole-body	tissue	1	7	5	5	Control-Impacted (CI)			Proline-Betaine	191.3	33.541	639.6	29.0689	Standard Error	No	unknown
334	Pierce_et_al._1992	marine	14	19	11	30	Experiment	artificial	Atlantic	Mollusca	Bivalvia	Crassostrea_virginica	euryhaline	adductor muscle	tissue	1	2	8	8	Control-Impacted (CI)			Alanine	65.8829	14.6881	145.661	34.106	Standard Error	No	acute
335	Pierce_et_al._1992	marine	14	19	11	30	Experiment	artificial	Bay	Mollusca	Bivalvia	Crassostrea_virginica	euryhaline	adductor muscle	tissue	1	2	8	8	Control-Impacted (CI)			Alanine	73.3334	24.8223	369.919	46.4223	Standard Error	No	acute
336	Pierce_et_al._1992	marine	14	19	11	30	Experiment	artificial	Atlantic	Mollusca	Bivalvia	Crassostrea_virginica	euryhaline	gills	tissue	1	2	8	8	Control-Impacted (CI)			Alanine	55.0649	16.0522	90.5526	14.1487	Standard Error	No	acute
337	Pierce_et_al._1992	marine	14	19	11	30	Experiment	artificial	Bay	Mollusca	Bivalvia	Crassostrea_virginica	euryhaline	gills	tissue	1	2	8	8	Control-Impacted (CI)			Alanine	39.9041	16.7791	228.148	103.685	Standard Error	No	acute
338	Pierce_et_al._1992	marine	14	19	11	30	Experiment	artificial	Atlantic	Mollusca	Bivalvia	Crassostrea_virginica	euryhaline	adductor muscle	tissue	1	2	8	8	Control-Impacted (CI)			Aspartate	55.9438	25.3287	59.8308	20.2394	Standard Error	No	acute
339	Pierce_et_al._1992	marine	14	19	11	30	Experiment	artificial	Bay	Mollusca	Bivalvia	Crassostrea_virginica	euryhaline	adductor muscle	tissue	1	2	8	8	Control-Impacted (CI)			Aspartate	110.005	16.2894	44.2927	15.6571	Standard Error	No	acute
340	Pierce_et_al._1992	marine	14	19	11	30	Experiment	artificial	Atlantic	Mollusca	Bivalvia	Crassostrea_virginica	euryhaline	gills	tissue	1	2	8	8	Control-Impacted (CI)			Aspartate	59.011	19.8847	62.0481	13.1808	Standard Error	No	acute
341	Pierce_et_al._1992	marine	14	19	11	30	Experiment	artificial	Bay	Mollusca	Bivalvia	Crassostrea_virginica	euryhaline	gills	tissue	1	2	8	8	Control-Impacted (CI)			Aspartate	90.3968	17.3188	41.349	8.12605	Standard Error	No	acute
342	Pierce_et_al._1992	marine	14	19	11	30	Experiment	artificial	Atlantic	Mollusca	Bivalvia	Crassostrea_virginica	euryhaline	adductor muscle	tissue	1	2	8	8	Control-Impacted (CI)			Betaine	254.987	98.5574	335.227	56.8739	Standard Error	No	acute
343	Pierce_et_al._1992	marine	14	19	11	30	Experiment	artificial	Bay	Mollusca	Bivalvia	Crassostrea_virginica	euryhaline	adductor muscle	tissue	1	2	8	8	Control-Impacted (CI)			Betaine	43.642	53.1026	32.6101	16.2307	Standard Error	No	acute
344	Pierce_et_al._1992	marine	14	19	11	30	Experiment	artificial	Atlantic	Mollusca	Bivalvia	Crassostrea_virginica	euryhaline	gills	tissue	1	2	8	8	Control-Impacted (CI)			Betaine	241.663	94.9126	403.311	96.4665	Standard Error	No	acute
345	Pierce_et_al._1992	marine	14	19	11	30	Experiment	artificial	Bay	Mollusca	Bivalvia	Crassostrea_virginica	euryhaline	gills	tissue	1	2	8	8	Control-Impacted (CI)			Betaine	27.4435	20.7201	66.5611	25.3983	Standard Error	No	acute
346	Pierce_et_al._1992	marine	14	19	11	30	Experiment	artificial	Atlantic	Mollusca	Bivalvia	Crassostrea_virginica	euryhaline	adductor muscle	tissue	1	2	8	8	Control-Impacted (CI)			Glutamate	57.6912	19.4725	54.9419	15.4423	Standard Error	No	acute
347	Pierce_et_al._1992	marine	14	19	11	30	Experiment	artificial	Bay	Mollusca	Bivalvia	Crassostrea_virginica	euryhaline	adductor muscle	tissue	1	2	8	8	Control-Impacted (CI)			Glutamate	53.3993	30.3054	58.5219	19.8866	Standard Error	No	acute
348	Pierce_et_al._1992	marine	14	19	11	30	Experiment	artificial	Atlantic	Mollusca	Bivalvia	Crassostrea_virginica	euryhaline	gills	tissue	1	2	8	8	Control-Impacted (CI)			Glutamate	50.8628	11.1565	52.2808	8.73055	Standard Error	No	acute
349	Pierce_et_al._1992	marine	14	19	11	30	Experiment	artificial	Bay	Mollusca	Bivalvia	Crassostrea_virginica	euryhaline	gills	tissue	1	2	8	8	Control-Impacted (CI)			Glutamate	40.7887	6.41169	46.3382	5.69508	Standard Error	No	acute
350	Pierce_et_al._1992	marine	14	19	11	30	Experiment	artificial	Atlantic	Mollusca	Bivalvia	Crassostrea_virginica	euryhaline	adductor muscle	tissue	1	2	8	8	Control-Impacted (CI)			Glycine	68.8377	63.4033	135.546	38.532	Standard Error	No	acute
351	Pierce_et_al._1992	marine	14	19	11	30	Experiment	artificial	Bay	Mollusca	Bivalvia	Crassostrea_virginica	euryhaline	adductor muscle	tissue	1	2	8	8	Control-Impacted (CI)			Glycine	71.5413	28.312	194.517	58.151	Standard Error	No	acute
352	Pierce_et_al._1992	marine	14	19	11	30	Experiment	artificial	Atlantic	Mollusca	Bivalvia	Crassostrea_virginica	euryhaline	gills	tissue	1	2	8	8	Control-Impacted (CI)			Glycine	43.7266	15.6706	65.5198	16.7087	Standard Error	No	acute
353	Pierce_et_al._1992	marine	14	19	11	30	Experiment	artificial	Bay	Mollusca	Bivalvia	Crassostrea_virginica	euryhaline	gills	tissue	1	2	8	8	Control-Impacted (CI)			Glycine	50.7274	24.1231	185.785	45.8604	Standard Error	No	acute
354	Pierce_et_al._1992	marine	14	19	11	30	Experiment	artificial	Atlantic	Mollusca	Bivalvia	Crassostrea_virginica	euryhaline	adductor muscle	tissue	1	2	8	8	Control-Impacted (CI)			Proline	19.7436	36.5636	89.0401	77.9043	Standard Error	No	acute
355	Pierce_et_al._1992	marine	14	19	11	30	Experiment	artificial	Bay	Mollusca	Bivalvia	Crassostrea_virginica	euryhaline	adductor muscle	tissue	1	2	8	8	Control-Impacted (CI)			Proline	9.3113	13.2613	149.67	32.9425	Standard Error	No	acute
356	Pierce_et_al._1992	marine	14	19	11	30	Experiment	artificial	Atlantic	Mollusca	Bivalvia	Crassostrea_virginica	euryhaline	gills	tissue	1	2	8	8	Control-Impacted (CI)			Proline	0	0	30.8743	29.9923	Standard Error	No	acute
357	Pierce_et_al._1992	marine	14	19	11	30	Experiment	artificial	Bay	Mollusca	Bivalvia	Crassostrea_virginica	euryhaline	gills	tissue	1	2	8	8	Control-Impacted (CI)			Proline	0	0	145.86	54.9935	Standard Error	No	acute
358	Pierce_et_al._1992	marine	14	19	11	30	Experiment	artificial	Atlantic	Mollusca	Bivalvia	Crassostrea_virginica	euryhaline	adductor muscle	tissue	1	2	8	8	Control-Impacted (CI)			Taurine	255.15	53.2166	342.467	80.6489	Standard Error	No	acute
359	Pierce_et_al._1992	marine	14	19	11	30	Experiment	artificial	Bay	Mollusca	Bivalvia	Crassostrea_virginica	euryhaline	adductor muscle	tissue	1	2	8	8	Control-Impacted (CI)			Taurine	65.7572	34.4121	72.4654	34.6054	Standard Error	No	acute
360	Pierce_et_al._1992	marine	14	19	11	30	Experiment	artificial	Atlantic	Mollusca	Bivalvia	Crassostrea_virginica	euryhaline	gills	tissue	1	2	8	8	Control-Impacted (CI)			Taurine	293.104	94.8959	500.617	54.4629	Standard Error	No	acute
361	Pierce_et_al._1992	marine	14	19	11	30	Experiment	artificial	Bay	Mollusca	Bivalvia	Crassostrea_virginica	euryhaline	gills	tissue	1	2	8	8	Control-Impacted (CI)			Taurine	170.873	77.8652	171.312	52.9758	Standard Error	No	acute
362	Podbielski et al. 2016	marine	28	27	7	34	Experiment	natural	Kiel, Germany	Cnidaria	Anthozoa	Diadumene lineata	euryhaline	whole body	tissue	1	4	8	8	Regression			ATP	0.00460499	0.00102104	0.00526182	0.00234734	Standard Deviation	No	gradual (2 psu/day)
363	Podbielski et al. 2016	marine	28	27	7	34	Experiment	natural	Kiel, Germany	Cnidaria	Anthozoa	Diadumene lineata	euryhaline	whole body	tissue	1	4	8	8	Regression			Betaine	0.00160963	0.000461836	0.310986	0.0741205	Standard Deviation	No	gradual (2 psu/day)
364	Podbielski et al. 2016	marine	28	27	7	34	Experiment	natural	Kiel, Germany	Cnidaria	Anthozoa	Diadumene lineata	euryhaline	whole body	tissue	1	4	8	8	Regression			Carnitine	0.0262327	0.0101399	0.0265088	0.0139291	Standard Deviation	No	gradual (2 psu/day)
365	Podbielski et al. 2016	marine	28	27	7	34	Experiment	natural	Kiel, Germany	Cnidaria	Anthozoa	Diadumene lineata	euryhaline	whole body	tissue	1	4	8	8	Regression			Dimethyl sulfone	0.00158797	0.000388348	0.113036	0.0449164	Standard Deviation	No	gradual (2 psu/day)
366	Podbielski et al. 2016	marine	28	27	7	34	Experiment	natural	Kiel, Germany	Cnidaria	Anthozoa	Diadumene lineata	euryhaline	whole body	tissue	1	4	8	8	Regression			Glycine	0.00215423	0.000468977	0.146865	0.0482943	Standard Deviation	No	gradual (2 psu/day)
367	Podbielski et al. 2016	marine	28	27	7	34	Experiment	natural	Kiel, Germany	Cnidaria	Anthozoa	Diadumene lineata	euryhaline	whole body	tissue	1	4	8	8	Regression			Homarine	0.00525716	0.00662112	0.0495604	0.0182503	Standard Deviation	No	gradual (2 psu/day)
368	Podbielski et al. 2016	marine	28	27	7	34	Experiment	natural	Kiel, Germany	Cnidaria	Anthozoa	Diadumene lineata	euryhaline	whole body	tissue	1	4	8	8	Regression			Taurine	0.0153262	0.00362167	0.116184	0.0264772	Standard Deviation	No	gradual (2 psu/day)
369	Potts 1958	marine	14	15	15	30	Experiment	NA	NA	Mollusca	Bivalvia	Mytilus edulis	euryhaline	Byssus retractor	tissue	1	2	10	12	Control-Impacted (CI)			Chloride	66	9.79796	91	9.79796	Standard Error	yes	unknown
370	Potts 1958	marine	14	15	15	30	Experiment	NA	NA	Mollusca	Bivalvia	Mytilus edulis	euryhaline	Fast adductor	tissue	1	2	10	6	Control-Impacted (CI)			Chloride	57	7.34847	75	7.34847	Standard Error	yes	unknown
371	Potts 1958	marine	14	15	15	30	Experiment	NA	NA	Mollusca	Bivalvia	Mytilus edulis	euryhaline	Slow adductor	tissue	1	2	10	6	Control-Impacted (CI)			Chloride	153.5	12.2474	238	12.2474	Standard Error	yes	unknown
372	Potts 1958	marine	14	15	15	30	Experiment	NA	NA	Mollusca	Bivalvia	Mytilus edulis		blood	body fluid			1	1	Control-Impacted (CI)			Potassium	124.4	12.2474	193	12.2474	Standard Error	No	unknown
373	Potts 1958	marine	14	15	15	30	Experiment	NA	NA	Mollusca	Bivalvia	Mytilus edulis	euryhaline	Byssus retractor	tissue	1	2	12	18	Control-Impacted (CI)			Potassium	60	12.6491	187	31.8434	Standard Error	yes	unknown
374	Potts 1958	marine	14	15	15	30	Experiment	NA	NA	Mollusca	Bivalvia	Mytilus edulis	euryhaline	Fast adductor	tissue	1	2	14	6	Control-Impacted (CI)			Potassium	74.6	12.6491	227	31.8434	Standard Error	yes	unknown
375	Potts 1958	marine	14	15	15	30	Experiment	NA	NA	Mollusca	Bivalvia	Mytilus edulis	euryhaline	Slow adductor	tissue	1	2	12	6	Control-Impacted (CI)			Potassium	92.5	18.9737	276	13.8564	Standard Error	yes	unknown
376	Potts 1958	marine	14	15	15	30	Experiment	NA	NA	Mollusca	Bivalvia	Mytilus edulis	euryhaline	Byssus retractor	tissue	1	2	12	18	Control-Impacted (CI)			Sodium	91.4	18.7083	125	9.79796	Standard Error	yes	unknown
377	Potts 1958	marine	14	15	15	30	Experiment	NA	NA	Mollusca	Bivalvia	Mytilus edulis	euryhaline	Fast adductor	tissue	1	2	14	6	Control-Impacted (CI)			Sodium	76.6	20.7846	115	14.6969	Standard Error	yes	unknown
378	Potts 1958	marine	14	15	15	30	Experiment	NA	NA	Mollusca	Bivalvia	Mytilus edulis	euryhaline	Slow adductor	tissue	1	2	12	6	Control-Impacted (CI)			Sodium	85.5	13.8564	112	12.7279	Standard Error	yes	unknown
379	Potts 1958	marine	14	15	15	30	Experiment	NA	NA	Mollusca	Bivalvia	Mytilus edulis	euryhaline	Byssus retractor	tissue	1	2	6	6	Control-Impacted (CI)			Taurine	7.4	0.26	12.5	0.2	Standard Error	No	unknown	ECS measured, but not included in these values
380	Potts 1958	marine	14	15	15	30	Experiment	NA	NA	Mollusca	Bivalvia	Mytilus edulis	euryhaline	ventral adductor	tissue	1	2	6	6	Control-Impacted (CI)			Taurine	58	22.4499	158	22.0454	Standard Error	No	unknown	ECS measured, but not included in these values
381	Potts 1958	marine	14	15	15	30	Experiment	NA	NA	Mollusca	Bivalvia	Mytilus edulis	euryhaline	Byssus retractor	tissue	1	2	6	6	Control-Impacted (CI)			Total Organics	82.5	17.3205	188	22.0454	Standard Error	No	unknown	ECS measured, but not included in these values
382	Potts 1958	marine	14	15	15	30	Experiment	NA	NA	Mollusca	Bivalvia	Mytilus edulis	euryhaline	ventral adductor	tissue	1	2	6	6	Control-Impacted (CI)			Total Organics	79.8	20.7846	212	38.1838	Standard Error	No	unknown	ECS measured, but not included in these values
383	Ran et al. 2017	marine	25	10	13	23	Experiment	natural	Xieqian port, Xiangshan county, Zhejiang province, China	Mollusca	Bivalvia	Sinonovacula constricta	euryhaline	whole body (except stomach)	tissue	1	2	18	18	Control-Impacted (CI)			Alanine	3.97	0.24	6.07	0.1	Standard Deviation	No	gradual (3-4 psu/8hrs)
384	Ran et al. 2017	marine	25	10	13	23	Experiment	natural	Xieqian port, Xiangshan county, Zhejiang province, China	Mollusca	Bivalvia	Sinonovacula constricta	euryhaline	whole body (except stomach)	tissue	1	2	18	18	Control-Impacted (CI)			Arginine	4.37	0.05	4.8	0.16	Standard Deviation	No	gradual (3-4 psu/8hrs)
385	Ran et al. 2017	marine	25	10	13	23	Experiment	natural	Xieqian port, Xiangshan county, Zhejiang province, China	Mollusca	Bivalvia	Sinonovacula constricta	euryhaline	whole body (except stomach)	tissue	1	2	18	18	Control-Impacted (CI)			Aspartate	5.3	0.22	5.42	0.03	Standard Deviation	No	gradual (3-4 psu/8hrs)
386	Ran et al. 2017	marine	25	10	13	23	Experiment	natural	Xieqian port, Xiangshan county, Zhejiang province, China	Mollusca	Bivalvia	Sinonovacula constricta	euryhaline	whole body (except stomach)	tissue	1	2	18	18	Control-Impacted (CI)			Cysteine	0.55	0.01	0.44	0.07	Standard Deviation	No	gradual (3-4 psu/8hrs)
387	Ran et al. 2017	marine	25	10	13	23	Experiment	natural	Xieqian port, Xiangshan county, Zhejiang province, China	Mollusca	Bivalvia	Sinonovacula constricta	euryhaline	whole body (except stomach)	tissue	1	2	18	18	Control-Impacted (CI)			Glutamate	10.99	0.25	11.05	0.21	Standard Deviation	No	gradual (3-4 psu/8hrs)
388	Ran et al. 2017	marine	25	10	13	23	Experiment	natural	Xieqian port, Xiangshan county, Zhejiang province, China	Mollusca	Bivalvia	Sinonovacula constricta	euryhaline	whole body (except stomach)	tissue	1	2	18	18	Control-Impacted (CI)			Glycine	2.8	0.07	3.4	0.13	Standard Deviation	No	gradual (3-4 psu/8hrs)
389	Ran et al. 2017	marine	25	10	13	23	Experiment	natural	Xieqian port, Xiangshan county, Zhejiang province, China	Mollusca	Bivalvia	Sinonovacula constricta	euryhaline	whole body (except stomach)	tissue	1	2	18	18	Control-Impacted (CI)			Histidine	1.01	0.1	1.02	0.03	Standard Deviation	No	gradual (3-4 psu/8hrs)
390	Ran et al. 2017	marine	25	10	13	23	Experiment	natural	Xieqian port, Xiangshan county, Zhejiang province, China	Mollusca	Bivalvia	Sinonovacula constricta	euryhaline	whole body (except stomach)	tissue	1	2	18	18	Control-Impacted (CI)			Isoleucine	2.63	0.06	2.54	0.09	Standard Deviation	No	gradual (3-4 psu/8hrs)
391	Ran et al. 2017	marine	25	10	13	23	Experiment	natural	Xieqian port, Xiangshan county, Zhejiang province, China	Mollusca	Bivalvia	Sinonovacula constricta	euryhaline	whole body (except stomach)	tissue	1	2	18	18	Control-Impacted (CI)			Leucine	4.67	0.05	4.6	0.11	Standard Deviation	No	gradual (3-4 psu/8hrs)
392	Ran et al. 2017	marine	25	10	13	23	Experiment	natural	Xieqian port, Xiangshan county, Zhejiang province, China	Mollusca	Bivalvia	Sinonovacula constricta	euryhaline	whole body (except stomach)	tissue	1	2	18	18	Control-Impacted (CI)			Lysine	4.03	0.23	3.99	0.08	Standard Deviation	No	gradual (3-4 psu/8hrs)
393	Ran et al. 2017	marine	25	10	13	23	Experiment	natural	Xieqian port, Xiangshan county, Zhejiang province, China	Mollusca	Bivalvia	Sinonovacula constricta	euryhaline	whole body (except stomach)	tissue	1	2	18	18	Control-Impacted (CI)			Methionine	1.36	0.1	1.41	0.04	Standard Deviation	No	gradual (3-4 psu/8hrs)
394	Ran et al. 2017	marine	25	10	13	23	Experiment	natural	Xieqian port, Xiangshan county, Zhejiang province, China	Mollusca	Bivalvia	Sinonovacula constricta	euryhaline	whole body (except stomach)	tissue	1	2	18	18	Control-Impacted (CI)			Phenylalanine	2.1	0.11	2.14	0.13	Standard Deviation	No	gradual (3-4 psu/8hrs)
395	Ran et al. 2017	marine	25	10	13	23	Experiment	natural	Xieqian port, Xiangshan county, Zhejiang province, China	Mollusca	Bivalvia	Sinonovacula constricta	euryhaline	whole body (except stomach)	tissue	1	2	18	18	Control-Impacted (CI)			Proline	2.18	0.26	2.42	0.64	Standard Deviation	No	gradual (3-4 psu/8hrs)
396	Ran et al. 2017	marine	25	10	13	23	Experiment	natural	Xieqian port, Xiangshan county, Zhejiang province, China	Mollusca	Bivalvia	Sinonovacula constricta	euryhaline	whole body (except stomach)	tissue	1	2	18	18	Control-Impacted (CI)			Serine	2.86	0.15	3.14	0.08	Standard Deviation	No	gradual (3-4 psu/8hrs)
397	Ran et al. 2017	marine	25	10	13	23	Experiment	natural	Xieqian port, Xiangshan county, Zhejiang province, China	Mollusca	Bivalvia	Sinonovacula constricta	euryhaline	whole body (except stomach)	tissue	1	2	18	18	Control-Impacted (CI)			Threonine	2.75	0.06	2.75	0.02	Standard Deviation	No	gradual (3-4 psu/8hrs)
398	Ran et al. 2017	marine	25	10	13	23	Experiment	natural	Xieqian port, Xiangshan county, Zhejiang province, China	Mollusca	Bivalvia	Sinonovacula constricta	euryhaline	whole body (except stomach)	tissue	1	2	18	18	Control-Impacted (CI)			Total Organics	56.16	0.69	59.79	0.93	Standard Deviation	No	gradual (3-4 psu/8hrs)
399	Ran et al. 2017	marine	25	10	13	23	Experiment	natural	Xieqian port, Xiangshan county, Zhejiang province, China	Mollusca	Bivalvia	Sinonovacula constricta	euryhaline	whole body (except stomach)	tissue	1	2	18	18	Control-Impacted (CI)			Tyrosine	1.88	0.04	1.92	0.09	Standard Deviation	No	gradual (3-4 psu/8hrs)
400	Ran et al. 2017	marine	25	10	13	23	Experiment	natural	Xieqian port, Xiangshan county, Zhejiang province, China	Mollusca	Bivalvia	Sinonovacula constricta	euryhaline	whole body (except stomach)	tissue	1	2	18	18	Control-Impacted (CI)			Valine	2.72	0.09	2.69	0.07	Standard Deviation	No	gradual (3-4 psu/8hrs)
401	Rola et al. 2017	marine	14	15	20	35	Experiment	natural	Rio Grande do Sul, Brazil	Mollusca	Bivalvia	Perna perna	euryhaline	haemolymph	body fluid	1	3	6	6	Control-Impacted (CI)	marine site		Chloride	334.7	29.3939	405.3	12.2474	Standard Error	No	gradual (3 psu/45min)
402	Rola et al. 2017	estuarine	14	15	20	35	Experiment	natural	Rio Grande do Sul, Brazil	Mollusca	Bivalvia	Perna perna	euryhaline	haemolymph	body fluid	1	3	6	6	Control-Impacted (CI)	estuarine site		Chloride	397.7	12.2474	407.5	39.1918	Standard Error	No	gradual (3 psu/45min)
403	Rola et al. 2017	marine	14	15	20	35	Experiment	natural	Rio Grande do Sul, Brazil	Mollusca	Bivalvia	Perna perna	euryhaline	haemolymph	body fluid	1	3	6	6	Control-Impacted (CI)	marine site		Potassium	10.74	3.67423	52.55	29.3939	Standard Error	No	gradual (3 psu/45min)
404	Rola et al. 2017	estuarine	14	15	20	35	Experiment	natural	Rio Grande do Sul, Brazil	Mollusca	Bivalvia	Perna perna	euryhaline	haemolymph	body fluid	1	3	6	6	Control-Impacted (CI)	estuarine site		Potassium	54.61	6.12372	53.24	15.9217	Standard Error	No	gradual (3 psu/45min)
405	Rola et al. 2017	marine	14	15	20	35	Experiment	natural	Rio Grande do Sul, Brazil	Mollusca	Bivalvia	Perna perna	euryhaline	haemolymph	body fluid	1	3	6	6	Control-Impacted (CI)	marine site		Sodium	213.5	22.0454	466	22.0454	Standard Error	No	gradual (3 psu/45min)
406	Rola et al. 2017	estuarine	14	15	20	35	Experiment	natural	Rio Grande do Sul, Brazil	Mollusca	Bivalvia	Perna perna	euryhaline	haemolymph	body fluid	1	3	6	6	Control-Impacted (CI)	estuarine site		Sodium	396.9	22.0454	442.2	75.9342	Standard Error	No	gradual (3 psu/45min)
407	Rola et al. 2017	marine	14	15	20	35	Experiment	natural	Rio Grande do Sul, Brazil	Mollusca	Bivalvia	Perna perna	euryhaline	haemolymph	body fluid	1	3	6	6	Control-Impacted (CI)			Total Organics	0.04349	1.22474	0.08968	0.489898	Standard Error	No	gradual (3 psu/45min)
408	Rola et al. 2017	estuarine	14	15	20	35	Experiment	natural	Rio Grande do Sul, Brazil	Mollusca	Bivalvia	Perna perna	euryhaline	haemolymph	body fluid	1	3	6	6	Control-Impacted (CI)			Total Organics	0.455	1.22474	0.1516	1.22474	Standard Error	No	gradual (3 psu/45min)
409	Rola et al. 2017	marine	14	15	20	35	Experiment	natural	Rio Grande do Sul, Brazil	Mollusca	Bivalvia	Perna perna	euryhaline	haemolymph	body fluid	1	3	6	6	Control-Impacted (CI)	marine site		Total Osmolality	338.2	93.0806	940.4	93.0806	Standard Error	No	gradual (3 psu/45min)
410	Rola et al. 2017	estuarine	14	15	20	35	Experiment	natural	Rio Grande do Sul, Brazil	Mollusca	Bivalvia	Perna perna	euryhaline	haemolymph	body fluid	1	3	6	6	Control-Impacted (CI)	estuarine site		Total Osmolality	931.8	93.0806	940.4	93.0806	Standard Error	No	gradual (3 psu/45min)
411	Rowland & Pierce 1985	marine	14	25	5	30	Experiment	artificial	Martha's Vineyard Island, Massachusetts, USA	Mollusca	Gastropoda	Elysia chlorotica	euryhaline	whole body	tissue	1	2	3	3	Control-Impacted (CI)			Total Organics	258.8	32.909	687.6	84.8705	Standard Error	No	unknown	Total organics = Quarternary Ammonium Compounds // n = 3-5
412	Sanders 2018	marine	28	11.5	4.5	16	Experiment	natural	Kiel, Germany	Mollusca	Bivalvia	Mytilus edulis	euryhaline	gills	tissue	1	5	4	4	Control-Impacted (CI)			Alanine	0.877988	0.265387	1.85817	0.475184	Standard Deviation	yes	gradual (2.2psu/day)
413	Sanders 2018	marine	28	11.5	4.5	16	Experiment	natural	Usedom, Germany	Mollusca	Bivalvia	Mytilus edulis	euryhaline	gills	tissue	1	5	4	4	Control-Impacted (CI)			Alanine	0.111433	0.169115	0.7359	0.234787	Standard Deviation	yes	gradual (2.2psu/day)
414	Sanders 2018	marine	28	11.5	4.5	16	Experiment	natural	Kiel, Germany	Mollusca	Bivalvia	Mytilus edulis	euryhaline	gills	tissue	1	5	4	4	Control-Impacted (CI)			Arginine	0.643888	0.232777	0.711538	0.195173	Standard Deviation	yes	gradual (2.2psu/day)
415	Sanders 2018	marine	28	11.5	4.5	16	Experiment	natural	Usedom, Germany	Mollusca	Bivalvia	Mytilus edulis	euryhaline	gills	tissue	1	5	4	4	Control-Impacted (CI)			Arginine	0.0576004	0.177902	0.495287	0.460363	Standard Deviation	yes	gradual (2.2psu/day)
416	Sanders 2018	marine	28	11.5	4.5	16	Experiment	natural	Kiel, Germany	Mollusca	Bivalvia	Mytilus edulis	euryhaline	gills	tissue	1	5	4	4	Control-Impacted (CI)			Aspartate	1.04121	0.0927795	6.25124	1.39774	Standard Deviation	yes	gradual (2.2psu/day)
417	Sanders 2018	marine	28	11.5	4.5	16	Experiment	natural	Usedom, Germany	Mollusca	Bivalvia	Mytilus edulis	euryhaline	gills	tissue	1	5	4	4	Control-Impacted (CI)			Aspartate	0.619829	0.279083	2.89878	0.75815	Standard Deviation	yes	gradual (2.2psu/day)
418	Sanders 2018	marine	28	11.5	4.5	16	Experiment	natural	Kiel, Germany	Mollusca	Bivalvia	Mytilus edulis	euryhaline	gills	tissue	1	5	4	4	Control-Impacted (CI)			Betaine	0.251188	0.146941	3.87526	0.850736	Standard Deviation	yes	gradual (2.2psu/day)
419	Sanders 2018	marine	28	11.5	4.5	16	Experiment	natural	Usedom, Germany	Mollusca	Bivalvia	Mytilus edulis	euryhaline	gills	tissue	1	5	4	4	Control-Impacted (CI)			Betaine	0.225288	0.0118845	1.41171	0.119525	Standard Deviation	yes	gradual (2.2psu/day)
420	Sanders 2018	marine	28	11.5	4.5	16	Experiment	natural	Kiel, Germany	Mollusca	Bivalvia	Mytilus edulis	euryhaline	gills	tissue	1	5	4	4	Control-Impacted (CI)			Glutamate	1.06631	0.274266	1.99246	0.385299	Standard Deviation	yes	gradual (2.2psu/day)
421	Sanders 2018	marine	28	11.5	4.5	16	Experiment	natural	Usedom, Germany	Mollusca	Bivalvia	Mytilus edulis	euryhaline	gills	tissue	1	5	4	4	Control-Impacted (CI)			Glutamate	0.190021	0.363544	1.23972	0.481862	Standard Deviation	yes	gradual (2.2psu/day)
422	Sanders 2018	marine	28	11.5	4.5	16	Experiment	natural	Kiel, Germany	Mollusca	Bivalvia	Mytilus edulis	euryhaline	gills	tissue	1	5	4	4	Control-Impacted (CI)			Glutamine	0.63965	0.131049	1.09644	0.153994	Standard Deviation	yes	gradual (2.2psu/day)
423	Sanders 2018	marine	28	11.5	4.5	16	Experiment	natural	Usedom, Germany	Mollusca	Bivalvia	Mytilus edulis	euryhaline	gills	tissue	1	5	4	4	Control-Impacted (CI)			Glutamine	0.147933	0.122794	0.396175	0.283438	Standard Deviation	yes	gradual (2.2psu/day)
424	Sanders 2018	marine	28	11.5	4.5	16	Experiment	natural	Kiel, Germany	Mollusca	Bivalvia	Mytilus edulis	euryhaline	gills	tissue	1	5	4	4	Control-Impacted (CI)			Glycine	0.616925	0.14455	4.88096	0.785016	Standard Deviation	yes	gradual (2.2psu/day)
425	Sanders 2018	marine	28	11.5	4.5	16	Experiment	natural	Usedom, Germany	Mollusca	Bivalvia	Mytilus edulis	euryhaline	gills	tissue	1	5	4	4	Control-Impacted (CI)			Glycine	1.30052	0.144901	19.6709	0.472675	Standard Deviation	yes	gradual (2.2psu/day)
426	Sanders 2018	marine	28	11.5	4.5	16	Experiment	natural	Kiel, Germany	Mollusca	Bivalvia	Mytilus edulis	euryhaline	gills	tissue	1	5	4	4	Control-Impacted (CI)			Guanidinosuccinaate	0.649975	0.221169	1.05261	0.118014	Standard Deviation	yes	gradual (2.2psu/day)
427	Sanders 2018	marine	28	11.5	4.5	16	Experiment	natural	Usedom, Germany	Mollusca	Bivalvia	Mytilus edulis	euryhaline	gills	tissue	1	5	4	4	Control-Impacted (CI)			Guanidinosuccinaate	0.366257	0.118989	1.00208	0.60215	Standard Deviation	yes	gradual (2.2psu/day)
428	Sanders 2018	marine	28	11.5	4.5	16	Experiment	natural	Kiel, Germany	Mollusca	Bivalvia	Mytilus edulis	euryhaline	gills	tissue	1	5	4	4	Control-Impacted (CI)			Lysine	1.15593	0.405302	1.2991	0.626378	Standard Deviation	yes	gradual (2.2psu/day)
429	Sanders 2018	marine	28	11.5	4.5	16	Experiment	natural	Usedom, Germany	Mollusca	Bivalvia	Mytilus edulis	euryhaline	gills	tissue	1	5	4	4	Control-Impacted (CI)			Lysine	0.228276	0.279745	0.89725	0.365712	Standard Deviation	yes	gradual (2.2psu/day)
430	Sanders 2018	marine	28	11.5	4.5	16	Experiment	natural	Kiel, Germany	Mollusca	Bivalvia	Mytilus edulis	euryhaline	gills	tissue	1	5	4	4	Control-Impacted (CI)			O phosphocholine	0.98015	0.426603	0.471487	0.173751	Standard Deviation	yes	gradual (2.2psu/day)
431	Sanders 2018	marine	28	11.5	4.5	16	Experiment	natural	Usedom, Germany	Mollusca	Bivalvia	Mytilus edulis	euryhaline	gills	tissue	1	5	4	4	Control-Impacted (CI)			O phosphocholine	0.0434071	0.366709	0.142175	0.397125	Standard Deviation	yes	gradual (2.2psu/day)
432	Sanders 2018	marine	28	11.5	4.5	16	Experiment	natural	Kiel, Germany	Mollusca	Bivalvia	Mytilus edulis	euryhaline	gills	tissue	1	5	4	4	Control-Impacted (CI)			Ornithine	1.83701	0.497254	1.5864	0.422867	Standard Deviation	yes	gradual (2.2psu/day)
433	Sanders 2018	marine	28	11.5	4.5	16	Experiment	natural	Usedom, Germany	Mollusca	Bivalvia	Mytilus edulis	euryhaline	gills	tissue	1	5	4	4	Control-Impacted (CI)			Ornithine	0.474441	0.362157	1.91244	1.35289	Standard Deviation	yes	gradual (2.2psu/day)
434	Sanders 2018	marine	28	11.5	4.5	16	Experiment	natural	Kiel, Germany	Mollusca	Bivalvia	Mytilus edulis	euryhaline	gills	tissue	1	5	4	4	Control-Impacted (CI)			Proline	0.4224	0.0600668	0.746725	0.450759	Standard Deviation	yes	gradual (2.2psu/day)
435	Sanders 2018	marine	28	11.5	4.5	16	Experiment	natural	Usedom, Germany	Mollusca	Bivalvia	Mytilus edulis	euryhaline	gills	tissue	1	5	4	4	Control-Impacted (CI)			Proline	0.0651918	0.0513379	0.322388	0.286788	Standard Deviation	yes	gradual (2.2psu/day)
436	Sanders 2018	marine	28	11.5	4.5	16	Experiment	natural	Kiel, Germany	Mollusca	Bivalvia	Mytilus edulis	euryhaline	gills	tissue	1	5	4	4	Control-Impacted (CI)			Serine	0.600413	0.174324	0.7386	0	Standard Deviation	yes	gradual (2.2psu/day)
437	Sanders 2018	marine	28	11.5	4.5	16	Experiment	natural	Usedom, Germany	Mollusca	Bivalvia	Mytilus edulis	euryhaline	gills	tissue	1	5	4	4	Control-Impacted (CI)			Serine	0.0980425	0.11517	0.621038	0.425638	Standard Deviation	yes	gradual (2.2psu/day)
438	Sanders 2018	marine	28	11.5	4.5	16	Experiment	natural	Kiel, Germany	Mollusca	Bivalvia	Mytilus edulis	euryhaline	gills	tissue	1	5	4	4	Control-Impacted (CI)			Succinate	0.630675	0.218729	0.548063	0.384534	Standard Deviation	yes	gradual (2.2psu/day)
439	Sanders 2018	marine	28	11.5	4.5	16	Experiment	natural	Usedom, Germany	Mollusca	Bivalvia	Mytilus edulis	euryhaline	gills	tissue	1	5	4	4	Control-Impacted (CI)			Succinate	0.155471	0.341898	0.364725	0.302262	Standard Deviation	yes	gradual (2.2psu/day)
440	Sanders 2018	marine	28	11.5	4.5	16	Experiment	natural	Kiel, Germany	Mollusca	Bivalvia	Mytilus edulis	euryhaline	gills	tissue	1	5	4	4	Control-Impacted (CI)			Taurine	1.97831	0.717797	12.5558	0.873875	Standard Deviation	yes	gradual (2.2psu/day)
441	Sanders 2018	marine	28	11.5	4.5	16	Experiment	natural	Usedom, Germany	Mollusca	Bivalvia	Mytilus edulis	euryhaline	gills	tissue	1	5	4	4	Control-Impacted (CI)			Taurine	0.215653	0.599204	1.68461	0.50845	Standard Deviation	yes	gradual (2.2psu/day)
442	Sanders 2018	marine	28	11.5	4.5	16	Experiment	natural	Kiel, Germany	Mollusca	Bivalvia	Mytilus edulis	euryhaline	gills	tissue	1	5	4	4	Control-Impacted (CI)			Total Organics	8.8847	2.34833	35.2085	2.1762	Standard Deviation	yes	gradual (2.2psu/day)
443	Sanders 2018	marine	28	11.5	4.5	16	Experiment	natural	Usedom, Germany	Mollusca	Bivalvia	Mytilus edulis	euryhaline	gills	tissue	1	5	4	4	Control-Impacted (CI)			Total Organics	2.04521	2.16985	30.1437	4.23804	Standard Deviation	yes	gradual (2.2psu/day)
444	Sanders 2018	marine	28	11.5	4.5	16	Experiment	natural	Kiel, Baltic Sea, Germany	Mollusca	Bivalvia	Mytilus sp.	euryhaline	haemolymph	body fluid	1	5	4	4	Control-Impacted (CI)	Kiel Population		Calcium	19.2781	3.73735	18.9944	6.88176	Standard Deviation	No	gradual (2.2psu/day)
445	Sanders 2018	marine	28	11.5	4.5	16	Experiment	natural	Usedom, Baltic Sea, Germany	Mollusca	Bivalvia	Mytilus sp.	euryhaline	haemolymph	body fluid	1	5	4	4	Control-Impacted (CI)	Usedom Population		Calcium	20.5002	1.15101	27.4824	4.0488	Standard Deviation	No	gradual (2.2psu/day)
446	Sanders 2018	marine	28	11.5	4.5	16	Experiment	natural	Kiel, Baltic Sea, Germany	Mollusca	Bivalvia	Mytilus sp.	euryhaline	Tissue	tissue	1	5	4	4	Control-Impacted (CI)	Kiel Population		Calcium	1.73375	0.221862	4.98625	0.662701	Standard Deviation	Yes	gradual (2.2psu/day)
447	Sanders 2018	marine	28	11.5	4.5	16	Experiment	natural	Usedom, Baltic Sea, Germany	Mollusca	Bivalvia	Mytilus sp.	euryhaline	Tissue	tissue	1	5	4	4	Control-Impacted (CI)	Usedom Population		Calcium	1.515	0.0990791	4.795	0.2755	Standard Deviation	Yes	gradual (2.2psu/day)
448	Sanders 2018	marine	28	11.5	4.5	16	Experiment	natural	Baltic Sea, Germany	Mollusca	Bivalvia	Mytilus sp.	euryhaline	haemolymph	body fluid	1	5	4	4	Control-Impacted (CI)	Kiel Population		Potassium	214.666	15.8965	175.023	27.2943	Standard Deviation	No	gradual (2.2psu/day)
449	Sanders 2018	marine	28	11.5	4.5	16	Experiment	natural	Baltic Sea, Germany	Mollusca	Bivalvia	Mytilus sp.	euryhaline	haemolymph	body fluid	1	5	4	4	Control-Impacted (CI)	Usedom Population		Potassium	233.529	34.2669	167.165	49.7469	Standard Deviation	No	gradual (2.2psu/day)
450	Sanders 2018	marine	28	11.5	4.5	16	Experiment	natural	Baltic Sea, Germany	Mollusca	Bivalvia	Mytilus sp.	euryhaline	Tissue	tissue	1	5	4	4	Control-Impacted (CI)	Kiel Population		Potassium	4.14875	0.764737	6.08375	0.956586	Standard Deviation	Yes	gradual (2.2psu/day)
451	Sanders 2018	marine	28	11.5	4.5	16	Experiment	natural	Baltic Sea, Germany	Mollusca	Bivalvia	Mytilus sp.	euryhaline	Tissue	tissue	1	5	4	4	Control-Impacted (CI)	Usedom Population		Potassium	1.79	0.268856	5.81875	0.851923	Standard Deviation	Yes	gradual (2.2psu/day)
452	Sanders 2018	marine	28	11.5	4.5	16	Experiment	natural	Baltic Sea, Germany	Mollusca	Bivalvia	Mytilus sp.	euryhaline	haemolymph	body fluid	1	5	4	4	Control-Impacted (CI)	Kiel Population		Sodium	146.891	44.6122	228.267	22.6372	Standard Deviation	No	gradual (2.2psu/day)
453	Sanders 2018	marine	28	11.5	4.5	16	Experiment	natural	Baltic Sea, Germany	Mollusca	Bivalvia	Mytilus sp.	euryhaline	haemolymph	body fluid	1	5	4	4	Control-Impacted (CI)	Usedom Population		Sodium	263.986	30.371	582.415	52.7131	Standard Deviation	No	gradual (2.2psu/day)
454	Sanders 2018	marine	28	11.5	4.5	16	Experiment	natural	Baltic Sea, Germany	Mollusca	Bivalvia	Mytilus sp.	euryhaline	Tissue	tissue	1	5	4	4	Control-Impacted (CI)	Kiel Population		Sodium	61.0625	2.88282	194.425	1.42974	Standard Deviation	Yes	gradual (2.2psu/day)
455	Sanders 2018	marine	28	11.5	4.5	16	Experiment	natural	Baltic Sea, Germany	Mollusca	Bivalvia	Mytilus sp.	euryhaline	Tissue	tissue	1	5	4	4	Control-Impacted (CI)	Usedom Population		Sodium	64.9	1.80601	198.8	4.32493	Standard Deviation	Yes	gradual (2.2psu/day)
456	Sanders 2018	marine	28	11.5	4.5	16	Experiment	natural	Baltic Sea, Germany	Mollusca	Bivalvia	Mytilus sp.	euryhaline	haemolymph	body fluid	1	5	4	4	Control-Impacted (CI)	Kiel Population		Total Osmolality	150.75	8.77021	456.75	9.28709	Standard Deviation	No	gradual (2.2psu/day)
457	Sanders 2018	marine	28	11.5	4.5	16	Experiment	natural	Baltic Sea, Germany	Mollusca	Bivalvia	Mytilus sp.	euryhaline	haemolymph	body fluid	1	5	4	4	Control-Impacted (CI)	Usedom Population		Total Osmolality	132.75	1.25831	458.5	30.6431	Standard Deviation	No	gradual (2.2psu/day)
458	Schiedek et al. 1997	marine	in situ	7	1	8	in situ	natural	Darss-Zingst Bodden, Ger & Joudkrante, Lithuania, Baltic Sea	Annelida	Polychaeta	Marenzelleria cf. Viridis	euryhaline	whole body	tissue	1	4	8	8	Control-Impacted (CI)			Alanine	16.42	2.82843	128.7	42.4264	Standard Error	no	NA
459	Schiedek et al. 1997	marine	14	23	1	24	Experiment	artificial	Darss-Zingst Bodden, Baltic Sea	Annelida	Polychaeta	Marenzelleria cf. Viridis	euryhaline	whole body	tissue	1	4	8	8	Control-Impacted (CI)			Alanine	1.9	0.848528	16.1	25.7387	Standard Error	no	gradual (8psu/week)
460	Schiedek et al. 1997	marine	in situ	7	1	8	in situ	natural	Darss-Zingst Bodden, Ger & Joudkrante, Lithuania, Baltic Sea	Annelida	Polychaeta	Marenzelleria cf. Viridis	euryhaline	whole body	tissue	1	4	8	8	Control-Impacted (CI)			Aspartate	10.12	14.1421	16.42	5.65685	Standard Error	no	NA
461	Schiedek et al. 1997	marine	14	23	1	24	Experiment	artificial	Darss-Zingst Bodden, Baltic Sea	Annelida	Polychaeta	Marenzelleria cf. Viridis	euryhaline	whole body	tissue	1	4	8	8	Control-Impacted (CI)			Aspartate	4.8	0.848528	4.7	3.11127	Standard Error	no	gradual (8psu/week)
462	Schiedek et al. 1997	marine	in situ	7	1	8	in situ	natural	Darss-Zingst Bodden, Ger & Joudkrante, Lithuania, Baltic Sea	Annelida	Polychaeta	Marenzelleria cf. Viridis	euryhaline	whole body	tissue	1	4	8	8	Control-Impacted (CI)			Glutamate	8.642	11.3137	11.98	11.3137	Standard Error	no	NA
463	Schiedek et al. 1997	marine	14	23	1	24	Experiment	artificial	Darss-Zingst Bodden, Baltic Sea	Annelida	Polychaeta	Marenzelleria cf. Viridis	euryhaline	whole body	tissue	1	4	8	8	Control-Impacted (CI)			Glutamate	3.5	0.565685	9.6	2.82843	Standard Error	no	gradual (8psu/week)
464	Schiedek et al. 1997	marine	in situ	7	1	8	in situ	natural	Darss-Zingst Bodden, Ger & Joudkrante, Lithuania, Baltic Sea	Annelida	Polychaeta	Marenzelleria cf. Viridis	euryhaline	whole body	tissue	1	4	8	8	Control-Impacted (CI)			Glycine	10.87	11.3137	63.12	28.2843	Standard Error	no	NA
465	Schiedek et al. 1997	marine	14	23	1	24	Experiment	artificial	Darss-Zingst Bodden, Baltic Sea	Annelida	Polychaeta	Marenzelleria cf. Viridis	euryhaline	whole body	tissue	1	4	8	8	Control-Impacted (CI)			Glycine	3.7	2.54558	18.2	9.33381	Standard Error	no	gradual (8psu/week)
466	Schiedek et al. 1997	marine	in situ	7	1	8	in situ	natural	Darss-Zingst Bodden, Ger & Joudkrante, Lithuania, Baltic Sea	Annelida	Polychaeta	Marenzelleria cf. Viridis	euryhaline	whole body	tissue	1	4	8	8	Control-Impacted (CI)			Proline	0.86	0	13.09	8.48528	Standard Error	no	NA
467	Schiedek et al. 1997	marine	14	23	1	24	Experiment	artificial	Darss-Zingst Bodden, Baltic Sea	Annelida	Polychaeta	Marenzelleria cf. Viridis	euryhaline	whole body	tissue	1	4	8	8	Control-Impacted (CI)			Proline	0.3	0.282843	2	2.82843	Standard Error	no	gradual (8psu/week)
468	Schiedek et al. 1997	marine	14	23	1	24	Experiment	artificial	Darss-Zingst Bodden, Baltic Sea	Annelida	Polychaeta	Marenzelleria cf. Viridis	euryhaline	whole body	tissue	1	4	8	8	Control-Impacted (CI)			Total Organics	62.54	22.6274	309.5	59.397	Standard Error	no	gradual (8psu/week)
469	Schiedek et al. 1998	marine	in situ	14	6	20	in situ	natural	River Tay, UK	Annelida	Polychaeta	Marenzelleria cf. Wireni	euryhaline	whole body	tissue	1	4	8	8	Control-Impacted (CI)			Alanine	8.165	8.48528	36.56	53.7401	Standard Error	no	NA
470	Schiedek et al. 1998	marine	in situ	14	6	20	in situ	natural	River Tay, UK	Annelida	Polychaeta	Marenzelleria cf. Wireni	euryhaline	whole body	tissue	1	4	8	8	Control-Impacted (CI)			Glycine	27.5	42.4264	81.27	76.3675	Standard Error	no	NA
471	Schiedek et al. 1998	marine	in situ	14	6	20	in situ	natural	River Tay, UK	Annelida	Polychaeta	Marenzelleria cf. Wireni	euryhaline	whole body	tissue	1	4	8	8	Control-Impacted (CI)			Total Organics	57.72	76.3675	143.2	76.3675	Standard Error	no	NA
472	Schiedek et al. 1998	marine	in situ	21	1	22	Experiment	artificial	NA	Annelida	Polychaeta	Marenzelleria cf. Wireni	euryhaline	whole body	tissue	1	5	8	8	Control-Impacted (CI)			Total Organics	64.83	28.2843	240.1	65.0538	Standard Error	no	gradual (8psu/week)
473	Schmittmann 2017	marine	31	16	16	32	Experiment	natural	Kiel, Germany	Echinodermata	Echinoidea	Asterias rubens	euryhaline	pyloric cecae	tissue	1	2	14	15	Control-Impacted (CI)			2-Phosphoglycerate	7.48533	2.94582	6.50587	2.9864	Standard Error	no	gradual (1psu/2-3 days)
474	Schmittmann 2017	marine	31	16	16	32	Experiment	natural	Sylt	Echinodermata	Echinoidea	Asterias rubens	euryhaline	pyloric cecae	tissue	1	2	13	10	Control-Impacted (CI)			2-Phosphoglycerate	6.253	2.33791	7.84333	2.4881	Standard Error	no	gradual (1psu/2-3 days)
475	Schmittmann 2017	marine	41	16	16	32	Experiment	natural	Kiel, Germany	Echinodermata	Echinoidea	Asterias rubens	euryhaline	pyloric cecae	tissue	1	2	3	5	Control-Impacted (CI)			2-Phosphoglycerate	5.53519	2.0254	7.34755	2.74966	Standard Error	no	gradual (1psu/2-3 days)
476	Schmittmann 2017	marine	31	16	16	32	Experiment	natural	Kiel, Germany	Echinodermata	Echinoidea	Asterias rubens	euryhaline	pyloric cecae	tissue	1	2	14	15	Control-Impacted (CI)			Alanine	4.686	4.28563	13.8525	11.9153	Standard Error	no	gradual (1psu/2-3 days)
477	Schmittmann 2017	marine	31	16	16	32	Experiment	natural	Sylt	Echinodermata	Echinoidea	Asterias rubens	euryhaline	pyloric cecae	tissue	1	2	13	10	Control-Impacted (CI)			Alanine	3.91863	2.90989	13.6264	13.067	Standard Error	no	gradual (1psu/2-3 days)
478	Schmittmann 2017	marine	41	16	16	32	Experiment	natural	Kiel, Germany	Echinodermata	Echinoidea	Asterias rubens	euryhaline	pyloric cecae	tissue	1	2	3	5	Control-Impacted (CI)			Alanine	4.27952	1.32786	7.6698	2.27989	Standard Error	no	gradual (1psu/2-3 days)
479	Schmittmann 2017	marine	31	16	16	32	Experiment	natural	Kiel, Germany	Echinodermata	Echinoidea	Asterias rubens	euryhaline	pyloric cecae	tissue	1	2	14	15	Control-Impacted (CI)			AMP	0.278548	0.14393	0.339111	0.36048	Standard Error	no	gradual (1psu/2-3 days)
480	Schmittmann 2017	marine	31	16	16	32	Experiment	natural	Sylt	Echinodermata	Echinoidea	Asterias rubens	euryhaline	pyloric cecae	tissue	1	2	13	10	Control-Impacted (CI)			AMP	0.3937	0.211637	0.480513	0.224371	Standard Error	no	gradual (1psu/2-3 days)
481	Schmittmann 2017	marine	41	16	16	32	Experiment	natural	Kiel, Germany	Echinodermata	Echinoidea	Asterias rubens	euryhaline	pyloric cecae	tissue	1	2	3	5	Control-Impacted (CI)			AMP	1.20967	0.754587	1.64553	0.635148	Standard Error	no	gradual (1psu/2-3 days)
482	Schmittmann 2017	marine	41	16	16	32	Experiment	natural	Kiel, Germany	Echinodermata	Echinoidea	Asterias rubens	euryhaline	pyloric cecae	tissue	1	2	3	5	Control-Impacted (CI)			Arginine	1.40564	0.18196	1.28563	0.286864	Standard Error	no	gradual (1psu/2-3 days)
483	Schmittmann 2017	marine	31	16	16	32	Experiment	natural	Kiel, Germany	Echinodermata	Echinoidea	Asterias rubens	euryhaline	pyloric cecae	tissue	1	2	14	15	Control-Impacted (CI)			Aspartate	2.42924	2.07994	3.37518	2.18334	Standard Error	no	gradual (1psu/2-3 days)
484	Schmittmann 2017	marine	31	16	16	32	Experiment	natural	Sylt	Echinodermata	Echinoidea	Asterias rubens	euryhaline	pyloric cecae	tissue	1	2	13	10	Control-Impacted (CI)			Aspartate	2.95267	1.88493	4.65428	2.2889	Standard Error	no	gradual (1psu/2-3 days)
485	Schmittmann 2017	marine	41	16	16	32	Experiment	natural	Kiel, Germany	Echinodermata	Echinoidea	Asterias rubens	euryhaline	pyloric cecae	tissue	1	2	3	5	Control-Impacted (CI)			Aspartate	3.88962	0.867899	4.64644	2.2299	Standard Error	no	gradual (1psu/2-3 days)
486	Schmittmann 2017	marine	31	16	16	32	Experiment	natural	Kiel, Germany	Echinodermata	Echinoidea	Asterias rubens	euryhaline	pyloric cecae	tissue	1	2	14	15	Control-Impacted (CI)			ATP	1.0829	0.245096	1.19022	0.292406	Standard Error	no	gradual (1psu/2-3 days)
487	Schmittmann 2017	marine	31	16	16	32	Experiment	natural	Sylt	Echinodermata	Echinoidea	Asterias rubens	euryhaline	pyloric cecae	tissue	1	2	13	10	Control-Impacted (CI)			ATP	1.27123	0.497821	1.74656	0.206528	Standard Error	no	gradual (1psu/2-3 days)
488	Schmittmann 2017	marine	41	16	16	32	Experiment	natural	Kiel, Germany	Echinodermata	Echinoidea	Asterias rubens	euryhaline	pyloric cecae	tissue	1	2	3	5	Control-Impacted (CI)			ATP	1.77032	0.239144	1.35816	0.703111	Standard Error	no	gradual (1psu/2-3 days)
489	Schmittmann 2017	marine	31	16	16	32	Experiment	natural	Kiel, Germany	Echinodermata	Echinoidea	Asterias rubens	euryhaline	pyloric cecae	tissue	1	2	14	15	Control-Impacted (CI)			Betaine	1.88217	0.943983	2.08	0.910545	Standard Error	no	gradual (1psu/2-3 days)
490	Schmittmann 2017	marine	31	16	16	32	Experiment	natural	Sylt	Echinodermata	Echinoidea	Asterias rubens	euryhaline	pyloric cecae	tissue	1	2	13	10	Control-Impacted (CI)			Betaine	2.1687	0.882758	2.59359	0.960989	Standard Error	no	gradual (1psu/2-3 days)
491	Schmittmann 2017	marine	41	16	16	32	Experiment	natural	Kiel, Germany	Echinodermata	Echinoidea	Asterias rubens	euryhaline	pyloric cecae	tissue	1	2	3	5	Control-Impacted (CI)			Betaine	4.11217	0.360469	2.65885	0.0831155	Standard Error	no	gradual (1psu/2-3 days)
492	Schmittmann 2017	marine	31	16	16	32	Experiment	natural	Kiel, Germany	Echinodermata	Echinoidea	Asterias rubens	euryhaline	pyloric cecae	tissue	1	2	14	15	Control-Impacted (CI)			Glutamate	5.08452	5.1226	5.07427	2.81181	Standard Error	no	gradual (1psu/2-3 days)
493	Schmittmann 2017	marine	31	16	16	32	Experiment	natural	Sylt	Echinodermata	Echinoidea	Asterias rubens	euryhaline	pyloric cecae	tissue	1	2	13	10	Control-Impacted (CI)			Glutamate	8.67757	4.35989	7.14233	3.07798	Standard Error	no	gradual (1psu/2-3 days)
494	Schmittmann 2017	marine	41	16	16	32	Experiment	natural	Kiel, Germany	Echinodermata	Echinoidea	Asterias rubens	euryhaline	pyloric cecae	tissue	1	2	3	5	Control-Impacted (CI)			Glutamate	3.91599	0.467956	4.47529	1.37389	Standard Error	no	gradual (1psu/2-3 days)
495	Schmittmann 2017	marine	31	16	16	32	Experiment	natural	Kiel, Germany	Echinodermata	Echinoidea	Asterias rubens	euryhaline	pyloric cecae	tissue	1	2	14	15	Control-Impacted (CI)			Glutamine	3.00298	2.68828	2.67987	2.16349	Standard Error	no	gradual (1psu/2-3 days)
496	Schmittmann 2017	marine	31	16	16	32	Experiment	natural	Sylt	Echinodermata	Echinoidea	Asterias rubens	euryhaline	pyloric cecae	tissue	1	2	13	10	Control-Impacted (CI)			Glutamine	1.9264	1.02622	5.37869	4.37283	Standard Error	no	gradual (1psu/2-3 days)
497	Schmittmann 2017	marine	31	16	16	32	Experiment	natural	Kiel, Germany	Echinodermata	Echinoidea	Asterias rubens	euryhaline	pyloric cecae	tissue	1	2	14	15	Control-Impacted (CI)			Glycine	129.075	32.2621	315.039	101.077	Standard Error	no	gradual (1psu/2-3 days)
498	Schmittmann 2017	marine	31	16	16	32	Experiment	natural	Sylt	Echinodermata	Echinoidea	Asterias rubens	euryhaline	pyloric cecae	tissue	1	2	13	10	Control-Impacted (CI)			Glycine	210.033	55.623	385.424	50.0825	Standard Error	no	gradual (1psu/2-3 days)
499	Schmittmann 2017	marine	41	16	16	32	Experiment	natural	Kiel, Germany	Echinodermata	Echinoidea	Asterias rubens	euryhaline	pyloric cecae	tissue	1	2	3	5	Control-Impacted (CI)			Glycine	58.2207	5.08783	539.1	47.7097	Standard Error	no	gradual (1psu/2-3 days)
500	Schmittmann 2017	marine	31	16	16	32	Experiment	natural	Kiel, Germany	Echinodermata	Echinoidea	Asterias rubens	euryhaline	pyloric cecae	tissue	1	2	14	15	Control-Impacted (CI)			Histidine	0.482024	0.667068	0.288822	0.354343	Standard Error	no	gradual (1psu/2-3 days)
501	Schmittmann 2017	marine	31	16	16	32	Experiment	natural	Sylt	Echinodermata	Echinoidea	Asterias rubens	euryhaline	pyloric cecae	tissue	1	2	13	10	Control-Impacted (CI)			Histidine	0.2385	0.249266	0.516282	0.538814	Standard Error	no	gradual (1psu/2-3 days)
502	Schmittmann 2017	marine	41	16	16	32	Experiment	natural	Kiel, Germany	Echinodermata	Echinoidea	Asterias rubens	euryhaline	pyloric cecae	tissue	1	2	3	5	Control-Impacted (CI)			Histidine	0.275452	0.0620587	0.276	0.0697117	Standard Error	no	gradual (1psu/2-3 days)
503	Schmittmann 2017	marine	31	16	16	32	Experiment	natural	Kiel, Germany	Echinodermata	Echinoidea	Asterias rubens	euryhaline	pyloric cecae	tissue	1	2	14	15	Control-Impacted (CI)			Hydroxyacetone	0.512405	0.23117	0.712978	0.321381	Standard Error	no	gradual (1psu/2-3 days)
504	Schmittmann 2017	marine	31	16	16	32	Experiment	natural	Sylt	Echinodermata	Echinoidea	Asterias rubens	euryhaline	pyloric cecae	tissue	1	2	13	10	Control-Impacted (CI)			Hydroxyacetone	0.473467	0.259829	1.22264	0.507289	Standard Error	no	gradual (1psu/2-3 days)
505	Schmittmann 2017	marine	41	16	16	32	Experiment	natural	Kiel, Germany	Echinodermata	Echinoidea	Asterias rubens	euryhaline	pyloric cecae	tissue	1	2	3	5	Control-Impacted (CI)			Hydroxyacetone	0.756727	0.131265	0.71805	0.158265	Standard Error	no	gradual (1psu/2-3 days)
506	Schmittmann 2017	marine	31	16	16	32	Experiment	natural	Kiel, Germany	Echinodermata	Echinoidea	Asterias rubens	euryhaline	pyloric cecae	tissue	1	2	14	15	Control-Impacted (CI)			Isoleucine	0.771929	0.301365	0.704511	0.273612	Standard Error	no	gradual (1psu/2-3 days)
507	Schmittmann 2017	marine	31	16	16	32	Experiment	natural	Sylt	Echinodermata	Echinoidea	Asterias rubens	euryhaline	pyloric cecae	tissue	1	2	13	10	Control-Impacted (CI)			Isoleucine	0.607133	0.098522	0.726385	0.310197	Standard Error	no	gradual (1psu/2-3 days)
508	Schmittmann 2017	marine	41	16	16	32	Experiment	natural	Kiel, Germany	Echinodermata	Echinoidea	Asterias rubens	euryhaline	pyloric cecae	tissue	1	2	3	5	Control-Impacted (CI)			Isoleucine	0.711092	0.252359	0.731384	0.216505	Standard Error	no	gradual (1psu/2-3 days)
509	Schmittmann 2017	marine	31	16	16	32	Experiment	natural	Kiel, Germany	Echinodermata	Echinoidea	Asterias rubens	euryhaline	pyloric cecae	tissue	1	2	14	15	Control-Impacted (CI)			Leucine	1.65086	1.66071	3.22631	2.50269	Standard Error	no	gradual (1psu/2-3 days)
510	Schmittmann 2017	marine	31	16	16	32	Experiment	natural	Sylt	Echinodermata	Echinoidea	Asterias rubens	euryhaline	pyloric cecae	tissue	1	2	13	10	Control-Impacted (CI)			Leucine	1.06157	0.655097	5.51969	6.0587	Standard Error	no	gradual (1psu/2-3 days)
511	Schmittmann 2017	marine	41	16	16	32	Experiment	natural	Kiel, Germany	Echinodermata	Echinoidea	Asterias rubens	euryhaline	pyloric cecae	tissue	1	2	3	5	Control-Impacted (CI)			Leucine	1.19303	0.12373	1.58821	0.47811	Standard Error	no	gradual (1psu/2-3 days)
512	Schmittmann 2017	marine	31	16	16	32	Experiment	natural	Kiel, Germany	Echinodermata	Echinoidea	Asterias rubens	euryhaline	pyloric cecae	tissue	1	2	14	15	Control-Impacted (CI)			Lysine	10.6334	4.36595	13.4892	8.96717	Standard Error	no	gradual (1psu/2-3 days)
513	Schmittmann 2017	marine	31	16	16	32	Experiment	natural	Sylt	Echinodermata	Echinoidea	Asterias rubens	euryhaline	pyloric cecae	tissue	1	2	13	10	Control-Impacted (CI)			Lysine	5.7364	4.95906	15.6165	6.74226	Standard Error	no	gradual (1psu/2-3 days)
514	Schmittmann 2017	marine	41	16	16	32	Experiment	natural	Kiel, Germany	Echinodermata	Echinoidea	Asterias rubens	euryhaline	pyloric cecae	tissue	1	2	3	5	Control-Impacted (CI)			Lysine	10.5681	0.79759	15.9112	2.59007	Standard Error	no	gradual (1psu/2-3 days)
515	Schmittmann 2017	marine	31	16	16	32	Experiment	natural	Kiel, Germany	Echinodermata	Echinoidea	Asterias rubens	euryhaline	pyloric cecae	tissue	1	2	14	15	Control-Impacted (CI)			Methionine	0.495452	0.304635	0.708089	0.477279	Standard Error	no	gradual (1psu/2-3 days)
516	Schmittmann 2017	marine	31	16	16	32	Experiment	natural	Sylt	Echinodermata	Echinoidea	Asterias rubens	euryhaline	pyloric cecae	tissue	1	2	13	10	Control-Impacted (CI)			Methionine	0.457833	0.221692	0.924897	0.880592	Standard Error	no	gradual (1psu/2-3 days)
517	Schmittmann 2017	marine	41	16	16	32	Experiment	natural	Kiel, Germany	Echinodermata	Echinoidea	Asterias rubens	euryhaline	pyloric cecae	tissue	1	2	3	5	Control-Impacted (CI)			Methionine	0.894734	0.302642	1.09402	0.429558	Standard Error	no	gradual (1psu/2-3 days)
518	Schmittmann 2017	marine	31	16	16	32	Experiment	natural	Kiel, Germany	Echinodermata	Echinoidea	Asterias rubens	euryhaline	pyloric cecae	tissue	1	2	14	15	Control-Impacted (CI)			Methylamine	0.610595	0.253561	1.85542	0.957663	Standard Error	no	gradual (1psu/2-3 days)
519	Schmittmann 2017	marine	31	16	16	32	Experiment	natural	Sylt	Echinodermata	Echinoidea	Asterias rubens	euryhaline	pyloric cecae	tissue	1	2	13	10	Control-Impacted (CI)			Methylamine	0.559667	0.273976	3.05379	0.605482	Standard Error	no	gradual (1psu/2-3 days)
520	Schmittmann 2017	marine	41	16	16	32	Experiment	natural	Kiel, Germany	Echinodermata	Echinoidea	Asterias rubens	euryhaline	pyloric cecae	tissue	1	2	3	5	Control-Impacted (CI)			Methylamine	0.800915	0.175662	0.806078	0.242129	Standard Error	no	gradual (1psu/2-3 days)
521	Schmittmann 2017	marine	31	16	16	32	Experiment	natural	Kiel, Germany	Echinodermata	Echinoidea	Asterias rubens	euryhaline	pyloric cecae	tissue	1	2	14	15	Control-Impacted (CI)			O-Phosphocholine	1.48821	0.57916	1.12789	0.544644	Standard Error	no	gradual (1psu/2-3 days)
522	Schmittmann 2017	marine	31	16	16	32	Experiment	natural	Sylt	Echinodermata	Echinoidea	Asterias rubens	euryhaline	pyloric cecae	tissue	1	2	13	10	Control-Impacted (CI)			O-Phosphocholine	0.991133	0.473518	2.23303	0.783995	Standard Error	no	gradual (1psu/2-3 days)
523	Schmittmann 2017	marine	41	16	16	32	Experiment	natural	Kiel, Germany	Echinodermata	Echinoidea	Asterias rubens	euryhaline	pyloric cecae	tissue	1	2	3	5	Control-Impacted (CI)			O-Phosphocholine	1.25116	0.330853	1.15948	0.206379	Standard Error	no	gradual (1psu/2-3 days)
524	Schmittmann 2017	marine	31	16	16	32	Experiment	natural	Kiel, Germany	Echinodermata	Echinoidea	Asterias rubens	euryhaline	pyloric cecae	tissue	1	2	14	15	Control-Impacted (CI)			O-Phosphoserine	3.90019	2.25193	3.38553	1.73737	Standard Error	no	gradual (1psu/2-3 days)
525	Schmittmann 2017	marine	31	16	16	32	Experiment	natural	Sylt	Echinodermata	Echinoidea	Asterias rubens	euryhaline	pyloric cecae	tissue	1	2	13	10	Control-Impacted (CI)			O-Phosphoserine	3.9646	3.64908	5.16231	1.84782	Standard Error	no	gradual (1psu/2-3 days)
526	Schmittmann 2017	marine	41	16	16	32	Experiment	natural	Kiel, Germany	Echinodermata	Echinoidea	Asterias rubens	euryhaline	pyloric cecae	tissue	1	2	3	5	Control-Impacted (CI)			O-Phosphoserine	3.09056	1.20082	4.59193	1.39937	Standard Error	no	gradual (1psu/2-3 days)
527	Schmittmann 2017	marine	31	16	16	32	Experiment	natural	Kiel, Germany	Echinodermata	Echinoidea	Asterias rubens	euryhaline	pyloric cecae	tissue	1	2	14	15	Control-Impacted (CI)			Phenylalanine	1.0185	1.30232	2.29489	2.55287	Standard Error	no	gradual (1psu/2-3 days)
528	Schmittmann 2017	marine	31	16	16	32	Experiment	natural	Sylt	Echinodermata	Echinoidea	Asterias rubens	euryhaline	pyloric cecae	tissue	1	2	13	10	Control-Impacted (CI)			Phenylalanine	0.482	0.421965	2.37387	2.20889	Standard Error	no	gradual (1psu/2-3 days)
529	Schmittmann 2017	marine	41	16	16	32	Experiment	natural	Kiel, Germany	Echinodermata	Echinoidea	Asterias rubens	euryhaline	pyloric cecae	tissue	1	2	3	5	Control-Impacted (CI)			Phenylalanine	1.64806	0.957376	0.790105	0.29314	Standard Error	no	gradual (1psu/2-3 days)
530	Schmittmann 2017	marine	31	16	16	32	Experiment	natural	Kiel, Germany	Echinodermata	Echinoidea	Asterias rubens	euryhaline	pyloric cecae	tissue	1	2	14	15	Control-Impacted (CI)			Serine	2.6745	1.18573	5.92747	7.42799	Standard Error	no	gradual (1psu/2-3 days)
531	Schmittmann 2017	marine	31	16	16	32	Experiment	natural	Sylt	Echinodermata	Echinoidea	Asterias rubens	euryhaline	pyloric cecae	tissue	1	2	13	10	Control-Impacted (CI)			Serine	2.9826	2.06226	4.74154	1.46946	Standard Error	no	gradual (1psu/2-3 days)
532	Schmittmann 2017	marine	41	16	16	32	Experiment	natural	Kiel, Germany	Echinodermata	Echinoidea	Asterias rubens	euryhaline	pyloric cecae	tissue	1	2	3	5	Control-Impacted (CI)			Serine	2.65359	0.91078	2.99391	0.615959	Standard Error	no	gradual (1psu/2-3 days)
533	Schmittmann 2017	marine	31	16	16	32	Experiment	natural	Kiel, Germany	Echinodermata	Echinoidea	Asterias rubens	euryhaline	pyloric cecae	tissue	1	2	14	15	Control-Impacted (CI)			Taurine	25.0324	8.7984	72.9506	28.6817	Standard Error	no	gradual (1psu/2-3 days)
534	Schmittmann 2017	marine	31	16	16	32	Experiment	natural	Sylt	Echinodermata	Echinoidea	Asterias rubens	euryhaline	pyloric cecae	tissue	1	2	13	10	Control-Impacted (CI)			Taurine	15.2799	5.85241	103.506	14.7986	Standard Error	no	gradual (1psu/2-3 days)
535	Schmittmann 2017	marine	41	16	16	32	Experiment	natural	Kiel, Germany	Echinodermata	Echinoidea	Asterias rubens	euryhaline	pyloric cecae	tissue	1	2	3	5	Control-Impacted (CI)			Taurine	6.85601	1.06094	22.5908	9.18242	Standard Error	no	gradual (1psu/2-3 days)
536	Schmittmann 2017	marine	31	16	16	32	Experiment	natural	Kiel, Germany	Echinodermata	Echinoidea	Asterias rubens	euryhaline	pyloric cecae	tissue	1	2	14	15	Control-Impacted (CI)			Threonine	2.13057	2.13225	2.92787	2.11696	Standard Error	no	gradual (1psu/2-3 days)
537	Schmittmann 2017	marine	31	16	16	32	Experiment	natural	Sylt	Echinodermata	Echinoidea	Asterias rubens	euryhaline	pyloric cecae	tissue	1	2	13	10	Control-Impacted (CI)			Threonine	1.54127	0.79836	4.17292	3.81473	Standard Error	no	gradual (1psu/2-3 days)
538	Schmittmann 2017	marine	41	16	16	32	Experiment	natural	Kiel, Germany	Echinodermata	Echinoidea	Asterias rubens	euryhaline	pyloric cecae	tissue	1	2	3	5	Control-Impacted (CI)			Threonine	2.36247	0.307282	2.94578	0.384932	Standard Error	no	gradual (1psu/2-3 days)
539	Schmittmann 2017	marine	31	16	16	32	Experiment	natural	Kiel, Germany	Echinodermata	Echinoidea	Asterias rubens	euryhaline	pyloric cecae	tissue	1	2	14	15	Control-Impacted (CI)			TMAO	4.113	2.68875	3.40156	3.79775	Standard Error	no	gradual (1psu/2-3 days)
540	Schmittmann 2017	marine	31	16	16	32	Experiment	natural	Sylt	Echinodermata	Echinoidea	Asterias rubens	euryhaline	pyloric cecae	tissue	1	2	13	10	Control-Impacted (CI)			TMAO	1.6632	1.2658	2.33785	1.56181	Standard Error	no	gradual (1psu/2-3 days)
541	Schmittmann 2017	marine	41	16	16	32	Experiment	natural	Kiel, Germany	Echinodermata	Echinoidea	Asterias rubens	euryhaline	pyloric cecae	tissue	1	2	3	5	Control-Impacted (CI)			TMAO	9.97009	0.316196	5.47132	6.52448	Standard Error	no	gradual (1psu/2-3 days)
542	Schmittmann 2017	marine	31	16	16	32	Experiment	natural	Kiel, Germany	Echinodermata	Echinoidea	Asterias rubens	euryhaline	pyloric cecae	tissue	1	2	14	15	Control-Impacted (CI)			Total Organics	216.407	41.2597	475.177	154.719	Standard Error	no	gradual (1psu/2-3 days)
543	Schmittmann 2017	marine	31	16	16	32	Experiment	natural	Sylt	Echinodermata	Echinoidea	Asterias rubens	euryhaline	pyloric cecae	tissue	1	2	13	10	Control-Impacted (CI)			Total Organics	277.364	76.3209	594.415	39.068	Standard Error	no	gradual (1psu/2-3 days)
544	Schmittmann 2017	marine	41	16	16	32	Experiment	natural	Kiel, Germany	Echinodermata	Echinoidea	Asterias rubens	euryhaline	pyloric cecae	tissue	1	2	3	5	Control-Impacted (CI)			Total Organics	131.374	10.3262	638.629	53.9812	Standard Error	no	gradual (1psu/2-3 days)
545	Schmittmann 2017	marine	31	16	16	32	Experiment	natural	Kiel, Germany	Echinodermata	Echinoidea	Asterias rubens	euryhaline	pyloric cecae	tissue	1	2	14	15	Control-Impacted (CI)			Tyrosine	1.96333	2.25334	3.8368	3.08802	Standard Error	no	gradual (1psu/2-3 days)
546	Schmittmann 2017	marine	31	16	16	32	Experiment	natural	Sylt	Echinodermata	Echinoidea	Asterias rubens	euryhaline	pyloric cecae	tissue	1	2	13	10	Control-Impacted (CI)			Tyrosine	0.934133	1.15087	5.12577	4.28113	Standard Error	no	gradual (1psu/2-3 days)
547	Schmittmann 2017	marine	41	16	16	32	Experiment	natural	Kiel, Germany	Echinodermata	Echinoidea	Asterias rubens	euryhaline	pyloric cecae	tissue	1	2	3	5	Control-Impacted (CI)			Tyrosine	1.11782	0.548068	1.44919	0.567631	Standard Error	no	gradual (1psu/2-3 days)
548	Schmittmann 2017	marine	31	16	16	32	Experiment	natural	Kiel, Germany	Echinodermata	Echinoidea	Asterias rubens	euryhaline	pyloric cecae	tissue	1	2	14	15	Control-Impacted (CI)			Valine	2.66979	2.86562	5.08269	4.65561	Standard Error	no	gradual (1psu/2-3 days)
549	Schmittmann 2017	marine	31	16	16	32	Experiment	natural	Sylt	Echinodermata	Echinoidea	Asterias rubens	euryhaline	pyloric cecae	tissue	1	2	13	10	Control-Impacted (CI)			Valine	1.21123	1.37777	6.48554	6.7375	Standard Error	no	gradual (1psu/2-3 days)
550	Schmittmann 2017	marine	41	16	16	32	Experiment	natural	Kiel, Germany	Echinodermata	Echinoidea	Asterias rubens	euryhaline	pyloric cecae	tissue	1	2	3	5	Control-Impacted (CI)			Valine	1.38696	0.810037	3.39264	2.79869	Standard Error	no	gradual (1psu/2-3 days)
551	Shumway 1977a	marine	28	25.6	6.4	32	Experiment	natural	Anglesey Coast, UK	Mollusca	Bivalvia	Mya arenaria	euryhaline	Haemolymph	body fluid	1	3	25	25	Control-Impacted (CI)			Calcium	2.4	3.5	10.2	5	Standard Error	No	unknown
552	Shumway 1977a	marine	28	25.6	6.4	32	Experiment	natural	Anglesey Coast, UK	Mollusca	Bivalvia	Mya arenaria	euryhaline	Haemolymph	body fluid	1	3	25	25	Control-Impacted (CI)			Magnesium	11.2	10	53	8.5	Standard Error	No	unknown
553	Shumway 1977a	marine	28	25.6	6.4	32	Experiment	natural	Anglesey Coast, UK	Mollusca	Bivalvia	Mya arenaria	euryhaline	Haemolymph	body fluid	1	3	25	25	Control-Impacted (CI)			Sodium	112	70	478	95	Standard Error	No	unknown
554	Shumway 1977a	marine	28	25.6	6.4	32	Experiment	natural	Anglesey Coast, UK	Mollusca	Bivalvia	Mya arenaria	euryhaline	Haemolymph	body fluid	1	3	25	25	Control-Impacted (CI)			Total Osmolality	210	80	1010	95	Standard Error	No	unknown
555	Silva 1992	marine	14	13	19	32	Experiment	artificial	purchased Bodega Marine Labs, Bodega Bay, CA, USA	Mollusca	Bivalvia	Mytilus californianus	euryhaline	gills	tissue	1	2	6	7	Control-Impacted (CI)			Alanine	2.22	0.832827	1.33	0.63498	Standard Error	no	gradual (3psu/2days)
556	Silva 1992	marine	14	13	19	32	Experiment	artificial	purchased Bodega Marine Labs, Bodega Bay, CA, USA	Mollusca	Bivalvia	Mytilus californianus	euryhaline	gills	tissue	1	2	6	7	Control-Impacted (CI)			Ammonia	3.74	2.05757	0.93	0.767268	Standard Error	no	gradual (3psu/2days)
557	Silva 1992	marine	14	13	19	32	Experiment	artificial	purchased Bodega Marine Labs, Bodega Bay, CA, USA	Mollusca	Bivalvia	Mytilus californianus	euryhaline	gills	tissue	1	2	6	7	Control-Impacted (CI)			Anserine	0.04	0.0734847	0.26	0.31749	Standard Error	no	gradual (3psu/2days)
558	Silva 1992	marine	14	13	19	32	Experiment	artificial	purchased Bodega Marine Labs, Bodega Bay, CA, USA	Mollusca	Bivalvia	Mytilus californianus	euryhaline	gills	tissue	1	2	6	7	Control-Impacted (CI)			Arginine	0.33	0.195959	0.38	0.21166	Standard Error	no	gradual (3psu/2days)
559	Silva 1992	marine	14	13	19	32	Experiment	artificial	purchased Bodega Marine Labs, Bodega Bay, CA, USA	Mollusca	Bivalvia	Mytilus californianus	euryhaline	gills	tissue	1	2	6	7	Control-Impacted (CI)			Aspartate	2.22	1.15126	4.62	0.926013	Standard Error	no	gradual (3psu/2days)
560	Silva 1992	marine	14	13	19	32	Experiment	artificial	purchased Bodega Marine Labs, Bodega Bay, CA, USA	Mollusca	Bivalvia	Mytilus californianus	euryhaline	gills	tissue	1	2	6	7	Control-Impacted (CI)			Carnitine	0.06	0.0244949	0	0	Standard Error	no	gradual (3psu/2days)
561	Silva 1992	marine	14	13	19	32	Experiment	artificial	purchased Bodega Marine Labs, Bodega Bay, CA, USA	Mollusca	Bivalvia	Mytilus californianus	euryhaline	gill	tissue	1	2	3	3	Control-Impacted (CI)			Chloride	216	36.3731	356	39.8372	Standard Error	yes	gradual (3psu/2days)
562	Silva 1992	marine	14	13	19	32	Experiment	artificial	purchased Bodega Marine Labs, Bodega Bay, CA, USA	Mollusca	Bivalvia	Mytilus californianus	euryhaline	gills	tissue	1	2	6	7	Control-Impacted (CI)			Citrulline	0.04	0.0489898	0.03	0.052915	Standard Error	no	gradual (3psu/2days)
563	Silva 1992	marine	14	13	19	32	Experiment	artificial	purchased Bodega Marine Labs, Bodega Bay, CA, USA	Mollusca	Bivalvia	Mytilus californianus	euryhaline	gills	tissue	1	2	6	7	Control-Impacted (CI)			Cystathionine	0.04	0.0979796	0.01	0.0264575	Standard Error	no	gradual (3psu/2days)
564	Silva 1992	marine	14	13	19	32	Experiment	artificial	purchased Bodega Marine Labs, Bodega Bay, CA, USA	Mollusca	Bivalvia	Mytilus californianus	euryhaline	gills	tissue	1	2	6	7	Control-Impacted (CI)			Glutamate	1.55	0.538888	1.5	0.264575	Standard Error	no	gradual (3psu/2days)
565	Silva 1992	marine	14	13	19	32	Experiment	artificial	purchased Bodega Marine Labs, Bodega Bay, CA, USA	Mollusca	Bivalvia	Mytilus californianus	euryhaline	gills	tissue	1	2	6	7	Control-Impacted (CI)			Glutamine	0.03	0.0244949	0.05	0.0264575	Standard Error	no	gradual (3psu/2days)
566	Silva 1992	marine	14	13	19	32	Experiment	artificial	purchased Bodega Marine Labs, Bodega Bay, CA, USA	Mollusca	Bivalvia	Mytilus californianus	euryhaline	gills	tissue	1	2	6	7	Control-Impacted (CI)			Glycine	0.7	0.318434	2.46	0.714353	Standard Error	no	gradual (3psu/2days)
567	Silva 1992	marine	14	13	19	32	Experiment	artificial	purchased Bodega Marine Labs, Bodega Bay, CA, USA	Mollusca	Bivalvia	Mytilus californianus	euryhaline	gills	tissue	1	2	6	7	Control-Impacted (CI)			Histidine	0.44	0.465403	0.3	0.238118	Standard Error	no	gradual (3psu/2days)
568	Silva 1992	marine	14	13	19	32	Experiment	artificial	purchased Bodega Marine Labs, Bodega Bay, CA, USA	Mollusca	Bivalvia	Mytilus californianus	euryhaline	gills	tissue	1	2	6	7	Control-Impacted (CI)			Homocysteine	0.55	1.15126	0	0	Standard Error	no	gradual (3psu/2days)
569	Silva 1992	marine	14	13	19	32	Experiment	artificial	purchased Bodega Marine Labs, Bodega Bay, CA, USA	Mollusca	Bivalvia	Mytilus californianus	euryhaline	gills	tissue	1	2	6	7	Control-Impacted (CI)			Homolysine-A	2.69	1.27373	4.61	2.56638	Standard Error	no	gradual (3psu/2days)
570	Silva 1992	marine	14	13	19	32	Experiment	artificial	purchased Bodega Marine Labs, Bodega Bay, CA, USA	Mollusca	Bivalvia	Mytilus californianus	euryhaline	gills	tissue	1	2	6	7	Control-Impacted (CI)			Hydroxyproline	0.12	0.0979796	0	0	Standard Error	no	gradual (3psu/2days)
571	Silva 1992	marine	14	13	19	32	Experiment	artificial	purchased Bodega Marine Labs, Bodega Bay, CA, USA	Mollusca	Bivalvia	Mytilus californianus	euryhaline	gills	tissue	1	2	6	7	Control-Impacted (CI)			Isoleucine	0.11	0.0489898	0.14	0.0793725	Standard Error	no	gradual (3psu/2days)
572	Silva 1992	marine	14	13	19	32	Experiment	artificial	purchased Bodega Marine Labs, Bodega Bay, CA, USA	Mollusca	Bivalvia	Mytilus californianus	euryhaline	gills	tissue	1	2	6	7	Control-Impacted (CI)			Leucine	0.12	0.0734847	0.03	0.0264575	Standard Error	no	gradual (3psu/2days)
573	Silva 1992	marine	14	13	19	32	Experiment	artificial	purchased Bodega Marine Labs, Bodega Bay, CA, USA	Mollusca	Bivalvia	Mytilus californianus	euryhaline	gills	tissue	1	2	6	7	Control-Impacted (CI)			Lysine	0.47	0.636867	0.43	0.185203	Standard Error	no	gradual (3psu/2days)
574	Silva 1992	marine	14	13	19	32	Experiment	artificial	purchased Bodega Marine Labs, Bodega Bay, CA, USA	Mollusca	Bivalvia	Mytilus californianus	euryhaline	gills	tissue	1	2	6	7	Control-Impacted (CI)			Ornithine	0.56	0.318434	0.37	0.396863	Standard Error	no	gradual (3psu/2days)
575	Silva 1992	marine	14	13	19	32	Experiment	artificial	purchased Bodega Marine Labs, Bodega Bay, CA, USA	Mollusca	Bivalvia	Mytilus californianus	euryhaline	gills	tissue	1	2	6	7	Control-Impacted (CI)			Phenylalanine	0.1	0.0734847	0.09	0.052915	Standard Error	no	gradual (3psu/2days)
576	Silva 1992	marine	14	13	19	32	Experiment	artificial	purchased Bodega Marine Labs, Bodega Bay, CA, USA	Mollusca	Bivalvia	Mytilus californianus	euryhaline	gills	tissue	1	2	6	7	Control-Impacted (CI)			Phosphatidylserine	0.47	0.269444	0.43	0.158745	Standard Error	no	gradual (3psu/2days)
577	Silva 1992	marine	14	13	19	32	Experiment	artificial	purchased Bodega Marine Labs, Bodega Bay, CA, USA	Mollusca	Bivalvia	Mytilus californianus	euryhaline	gill	tissue	1	2	6	6	Control-Impacted (CI)			Potassium	46	4.40908	48	4.16413	Standard Error	yes	gradual (3psu/2days)
578	Silva 1992	marine	14	13	19	32	Experiment	artificial	purchased Bodega Marine Labs, Bodega Bay, CA, USA	Mollusca	Bivalvia	Mytilus californianus	euryhaline	gills	tissue	1	2	6	7	Control-Impacted (CI)			Sarcosine	0.09	0.122474	0.03	0.0793725	Standard Error	no	gradual (3psu/2days)
579	Silva 1992	marine	14	13	19	32	Experiment	artificial	purchased Bodega Marine Labs, Bodega Bay, CA, USA	Mollusca	Bivalvia	Mytilus californianus	euryhaline	gills	tissue	1	2	6	7	Control-Impacted (CI)			Serine	0.32	0.171464	0.39	0.42332	Standard Error	no	gradual (3psu/2days)
580	Silva 1992	marine	14	13	19	32	Experiment	artificial	purchased Bodega Marine Labs, Bodega Bay, CA, USA	Mollusca	Bivalvia	Mytilus californianus	euryhaline	gill	tissue	1	2	6	6	Control-Impacted (CI)			Sodium	160	29.3939	288	21.8005	Standard Error	yes	gradual (3psu/2days)
581	Silva 1992	marine	14	13	19	32	Experiment	artificial	purchased Bodega Marine Labs, Bodega Bay, CA, USA	Mollusca	Bivalvia	Mytilus californianus	euryhaline	gills	tissue	1	2	6	7	Control-Impacted (CI)			Taurine	24.9	2.30252	49.9	12.9906	Standard Error	No	gradual (3psu/2days)
582	Silva 1992	marine	14	13	19	32	Experiment	artificial	purchased Bodega Marine Labs, Bodega Bay, CA, USA	Mollusca	Bivalvia	Mytilus californianus	euryhaline	gills	tissue	1	2	6	7	Control-Impacted (CI)			Threonine	0.26	0.195959	0.19	0.132288	Standard Error	No	gradual (3psu/2days)
583	Silva 1992	marine	14	13	19	32	Experiment	artificial	purchased Bodega Marine Labs, Bodega Bay, CA, USA	Mollusca	Bivalvia	Mytilus californianus	euryhaline	gills	tissue	1	2	6	7	Control-Impacted (CI)			Total Organics	47.64	6.78509	75.08	20.3194	Standard Error	No	gradual (3psu/2days)
584	Silva 1992	marine	14	13	19	32	Experiment	artificial	purchased Bodega Marine Labs, Bodega Bay, CA, USA	Mollusca	Bivalvia	Mytilus californianus	euryhaline	gills	tissue	1	2	6	7	Control-Impacted (CI)			Tyrosine	0.18	0.0979796	0.12	0.052915	Standard Error	No	gradual (3psu/2days)
585	Silva 1992	marine	14	13	19	32	Experiment	artificial	purchased Bodega Marine Labs, Bodega Bay, CA, USA	Mollusca	Bivalvia	Mytilus californianus	euryhaline	gills	tissue	1	2	6	7	Control-Impacted (CI)			Urea	2.39	1.4452	4.96	1.98431	Standard Error	No	gradual (3psu/2days)
586	Silva 1992	marine	14	13	19	32	Experiment	artificial	purchased Bodega Marine Labs, Bodega Bay, CA, USA	Mollusca	Bivalvia	Mytilus californianus	euryhaline	gills	tissue	1	2	6	7	Control-Impacted (CI)			Valine	0.07	0.0489898	0.04	0.10583	Standard Error	No	gradual (3psu/2days)
587	Silva 1992	marine	14	13	19	32	Experiment	artificial	purchased Bodega Marine Labs, Bodega Bay, CA, USA	Mollusca	Bivalvia	Mytilus californianus	euryhaline	gills	tissue	1	2	6	7	Control-Impacted (CI)			α-Aminoadipic acid	0.95	0.710352	0.15	0.238118	Standard Error	No	gradual (3psu/2days)
588	Silva 1992	marine	14	13	19	32	Experiment	artificial	purchased Bodega Marine Labs, Bodega Bay, CA, USA	Mollusca	Bivalvia	Mytilus californianus	euryhaline	gills	tissue	1	2	6	7	Control-Impacted (CI)			α-Aminoisobuytric acid	0.09	0.0979796	0.01	0.0264575	Standard Error	No	gradual (3psu/2days)
589	Silva 1992	marine	14	13	19	32	Experiment	artificial	purchased Bodega Marine Labs, Bodega Bay, CA, USA	Mollusca	Bivalvia	Mytilus californianus	euryhaline	gills	tissue	1	2	6	7	Control-Impacted (CI)			α-Methylhistidine	0.08	0.122474	0	0	Standard Error	No	gradual (3psu/2days)
590	Silva 1992	marine	14	13	19	32	Experiment	artificial	purchased Bodega Marine Labs, Bodega Bay, CA, USA	Mollusca	Bivalvia	Mytilus californianus	euryhaline	gills	tissue	1	2	6	7	Control-Impacted (CI)			β-Alanine	0.17	0.220454	0.02	0.052915	Standard Error	No	gradual (3psu/2days)
591	Silva 1992	marine	14	13	19	32	Experiment	artificial	purchased Bodega Marine Labs, Bodega Bay, CA, USA	Mollusca	Bivalvia	Mytilus californianus	euryhaline	gills	tissue	1	2	6	7	Control-Impacted (CI)			β-Aminoisobuytric acid	0.05	0.0734847	0.01	0.0264575	Standard Error	No	gradual (3psu/2days)
592	Silva 1992	marine	14	13	19	32	Experiment	artificial	purchased Bodega Marine Labs, Bodega Bay, CA, USA	Mollusca	Bivalvia	Mytilus californianus	euryhaline	gills	tissue	1	2	6	7	Control-Impacted (CI)			γ-Aminoisobuytric acid	1.14	0.195959	1.32	0.291033	Standard Error	No	gradual (3psu/2days)
593	Silva 1992	marine	14	13	19	32	Experiment	artificial	purchased Bodega Marine Labs, Bodega Bay, CA, USA	Mollusca	Bivalvia	Mytilus californianus	euryhaline	gills	tissue	1	2	6	7	Control-Impacted (CI)			γ-Methylhistidine	0.02	0.0244949	0	0	Standard Error	No	gradual (3psu/2days)
594	Stickle et al. 1985	marine	14	20	15	35	Experiment	NA	Bovisand, UK	Mollusca	Gastropoda	Nucella lapillus	euryhaline	foot	tissue	1	6	NA	NA	Control-Impacted (CI)			Alanine	13.17	4.28661	25.61	4.28661	Standard Error	No	gradual (2psu/day)	Error bars smaller than data points
595	Stickle et al. 1985	marine	14	20	15	35	Experiment	NA	Bovisand, UK	Mollusca	Gastropoda	Nucella lapillus	euryhaline	foot	tissue	1	6	NA	NA	Control-Impacted (CI)			Arginine	33.81	4.28661	21.43	4.28661	Standard Error	No	gradual (2psu/day)	Error bars smaller than data points
596	Stickle et al. 1985	marine	14	20	15	35	Experiment	NA	Bovisand, UK	Mollusca	Gastropoda	Nucella lapillus	euryhaline	foot	tissue	1	6	NA	NA	Control-Impacted (CI)			Aspartate	11.9	4.28661	10.48	4.28661	Standard Error	No	gradual (2psu/day)	Error bars smaller than data points
597	Stickle et al. 1985	marine	14	20	15	35	Experiment	NA	Bovisand, UK	Mollusca	Gastropoda	Nucella lapillus	euryhaline	foot	tissue	1	6	NA	NA	Control-Impacted (CI)			Glutamate	14.95	4.28661	11.86	4.28661	Standard Error	No	gradual (2psu/day)	Error bars smaller than data points
598	Stickle et al. 1985	marine	14	20	15	35	Experiment	NA	Bovisand, UK	Mollusca	Gastropoda	Nucella lapillus	euryhaline	foot	tissue	1	6	NA	NA	Control-Impacted (CI)			Taurine	325.2	23.2702	336.1	23.2702	Standard Error	No	gradual (2psu/day)	Error bars smaller than data points
599	Stickle et al. 1985	marine	14	20	15	35	Experiment	NA	Bovisand, UK	Mollusca	Gastropoda	Nucella lapillus	euryhaline	foot	tissue	1	6	6	6	Control-Impacted (CI)			Total Organics	477.7	36.7423	448.9	52.664	Standard Error	No	gradual (2psu/day)
600	Stucchi-Zucchi & Salomao 1998	marine	15	20	15	35	Experiment	NA	Sa˜o Paulo State, Brazil	Mollusca	Bivalvia	Perna perna	euryhaline	cerebro-visceral connective	tissue	1	2	13	19	Control-Impacted (CI)			Chloride	153.4	69.2266	163.1	51.8709	Standard Error	yes	unknown
601	Stucchi-Zucchi & Salomao 1998	marine	15	20	15	35	Experiment	NA	Sa˜o Paulo State, Brazil	Mollusca	Bivalvia	Perna perna	euryhaline	cerebro-visceral connective	tissue	1	2	11	18	Control-Impacted (CI)			Potassium	160.1	23.8797	215.8	42.4264	Standard Error	yes	unknown
602	Stucchi-Zucchi & Salomao 1998	marine	15	20	15	35	Experiment	NA	Sa˜o Paulo State, Brazil	Mollusca	Bivalvia	Perna perna	euryhaline	cerebro-visceral connective	tissue	1	2	11	15	Control-Impacted (CI)			Sodium	126.6	36.1512	151.5	31.3712	Standard Error	yes	unknown
603	Willmer 1978a	marine	14	30.7	7	37.7	Experiment	natural	Plymouth, UK	Mollusca	Bivalvia	Mytilus edulis	euryhaline	blood	body fluid	1	6	5	5	Control-Impacted (CI)			Calcium	2.527	0.111803	11.72	0.111803	2 Standard Error	No	unknown
604	Willmer 1978a	marine	14	30.7	7	37.7	Experiment	natural	Plymouth, UK	Mollusca	Bivalvia	Mytilus edulis	euryhaline	blood	body fluid	1	6	5	5	Control-Impacted (CI)			Chloride	124.6	2.23607	665.6	2.23607	2 Standard Error	No	unknown
605	Willmer 1978a	marine	14	30.7	7	37.7	Experiment	natural	Plymouth, UK	Mollusca	Bivalvia	Mytilus edulis	euryhaline	blood	body fluid	1	6	5	5	Control-Impacted (CI)			Magnesium	10.22	0.111803	43.9	0.111803	2 Standard Error	No	unknown
606	Willmer 1978a	marine	14	30.7	7	37.7	Experiment	natural	Plymouth, UK	Mollusca	Bivalvia	Mytilus edulis	euryhaline	blood	body fluid	1	6	5	5	Control-Impacted (CI)			Sodium	114.3	2.23607	541.5	2.23607	2 Standard Error	No	unknown
607	Willmer 1978a	marine	14	30.7	7	37.7	Experiment	natural	Plymouth, UK	Mollusca	Bivalvia	Mytilus edulis	euryhaline	blood	body fluid	1	6	5	5	Control-Impacted (CI)			Total Osmolality	257.7	4.47214	1297	4.47214	2 Standard Error	No	unknown	Error bars smaller than data points
608	Willmer 1978a	marine	14	30.7	7	37.7	Experiment	natural	Plymouth, UK	Mollusca	Bivalvia	Mytilus edulis	euryhaline	mantle fluid	body fluid	1	6	5	5	Control-Impacted (CI)			Total Osmolality	278.6	4.47214	1316	4.47214	2 Standard Error	No	unknown	Error bars smaller than data points
609	Willmer 1978a	marine	14	30.7	7	37.7	Experiment	natural	Plymouth, UK	Mollusca	Bivalvia	Mytilus edulis	euryhaline	pericardial fluid	body fluid	1	6	5	5	Control-Impacted (CI)			Total Osmolality	287	4.47214	1330	4.47214	2 Standard Error	No	unknown	Error bars smaller than data points
610	Witteveen et al. 1987	marine	21	35.7875	5.1	40.9	Experiment	artificial	Schiermonnikoog & Texel, Netherlands	Arthropoda	Collembola	Anurida maritima	euryhaline	haemolymph	body fluid	1	3	6	6	Control-Impacted (CI)			Total Osmolality	407.1	106	2036	74	Standard Deviation	No	acute
