# Supplementary material for: Acclimation of marine invertebrate osmolyte systems to low salinity: A systematic review & meta-analysis
Source: Frontiers journal article supplement (doi:10.3389/fmars.2022.934378), 2022-09-02
Supplement: Table_3.XLSX [file Table_3.XLSX]

## Sheet: Sensitivity Analysis
Table S3 - Results of sensitivity analysis per outcome variable. Influential studies were identified and excluded. If the mean effect size (MES) was significant as indicated by an asterisk, further sensitivity analyses were conducted to test whether the results are robust. k denotes the number of studies. The fail-safe number was calculated after Rosenberg. If its robustness is higher than specif…
ID	Outcome	Influential studies	Name of removed studies	MES	k	Fail-safe no. (n)	Robustness of fail-safe no. (n > 5*k+10)	Funnel Plot Asymmetry	Egger's Test	ES robust to Trim & Fill?	p-curve (true effect present?)
1	Alanine	1	Ran et al. 2017	*	37	1271	195	yes	sig	yes	yes
2	Arginine	1	Ran_et_al._2017-2	NA	11	NA	NA	NA	NA	NA	NA
3	Ammonia	1	Silva_1992-2	*	5	5	35	no	ns	NA	error
4	Asparagine	NA	NA	NA	3	NA	NA	no	ns	NA	NA
5	Aspartate	NA	NA	NA	24	NA	NA	yes	ns	NA	NA
6	Betaine	NA	NA	*	14	85	80	yes	sig	yes	yes
8	Chloride	1	Potts_1958	NA	4	NA	NA	NA	NA	NA	NA
9	Glutamate	1	Schiedek_et_al._1997-6	*	30	36	160	no	sig	no	no
10	Glutamine	1	Schmittmann_2017-17	*	11	47	65	no	ns	NA	no
11	Glycine	2	Kapper_et_al._1985-5 , Ran_et_al._2017-5	*	34	1893	180	yes	sig	yes	yes
12	Histidine	NA	NA	NA	7	NA	NA	NA	NA	NA	NA
13	Isoleucine	NA	NA	NA	7	NA	NA	NA	NA	NA	NA
14	Leucine	NA	NA	NA	7	NA	NA	NA	NA	NA	NA
15	Lysine	1	Schmittmann_2017-35	NA	9	NA	NA	NA	NA	NA	NA
16	Magnesium	2	Austin - 2007, Berger_et_al._1978-2	NA	3	NA	NA	NA	NA	NA	NA
17	Methionine	NA	NA	*	6	11	40	no	ns	NA	low k
18	O-Phosphocholine	1	Schmittmann_2017-44	NA	4	NA	NA	NA	NA	NA	NA
19	Ornithine	NA	NA	NA	6	NA	NA	NA	NA	NA	NA
20	Phenylalanine	NA	NA	NA	7	NA	NA	NA	NA	NA	NA
21	(O-)Phosphoserine	1	Kapper_et_al._1985-7	NA	4	NA	NA	NA	NA	NA	NA
22	Potassium	NA	NA	NA	15	NA	NA	NA	NA	NA	NA
23	Proline	NA	NA	*	13	169	75	yes	sig	yes	yes
24	Serine	NA	NA	*	19	180	105	yes	ns	NA	yes
25	Sodium	1	Natochin_et_al._1978-2	*	9	154	55	yes	sig	no	yes
26	Taurine	2	Lin_et_al._2016-13, Schmittmann_2017-56	*	25	670	135	yes	sig	yes	yes
27	Threonine	NA	NA	NA	13	NA	NA	NA	NA	NA	NA
28	Total Organics	1	Kapper_et_al._1985-12	*	31	1974	165	yes	sig	yes	yes
30	Tyrosine	1	Silva_1992-21	*	5	14	35	no	ns	NA	low k
31	Valine	1	Ran_et_al._2017-17	*	6	8	40	no	ns	NA	low k
