# Supplementary material for: Acclimation of marine invertebrate osmolyte systems to low salinity: A systematic review & meta-analysis
Source: Frontiers journal article supplement (doi:10.3389/fmars.2022.934378), 2022-09-02
Supplement: Table_4.xlsx [file Table_4.xlsx]

## Sheet: MA_results
Table S4: Statistical results of robust test for random effects and mixed-effect categorical meta-analysis
	Overall			Taxa				Class				Sample Type				Physiotype
Outcome	t-value	df*	p-value	QM	df1	df2	p-value	QM	df1	df2	p-value	QM	df1	df2	p-value	QM	df1	df2	p-value
Alanine	-5.7241	26	<0.0001	98.5939	3	22	<0.0001					24.9312	5	22	<0.0001
Ammonia	-131.464	1	0.0048
Arginine	-8.6303	2	0.0132
Asparagine	-2.2422	2	0.1542
Aspartate	-0.6387	17	0.5315	10.9937	2	14	0.0013					5.1903	4	13	0.0101
Betaine	-2.8773	8	0.0206	51.779	2	6	0.0002					18.9747	2	6	0.0025
Chloride	-1.4832	2	0.2763
Glutamate	-3.3918	30	0.0029	7.7093	2	17	0.0041					3.8606	4	16	0.0222
Glutamine	-5.4873	7	0.0009									11.4652	2	3	0.0394
Glycine	-8.4089	24	<0.0001	19.9759	3	19	<0.0001					30.8141	5	19	<0.0001
Histidine	0.0948	6	0.9275
Isoleucine	0.1024	6	0.9218	0.5694	2	4	0.6059
Leucine	-0.8389	6	0.4337	21.4929	2	4	0.0072
Lysine	-2.0102	8	0.0793
Magnesium	-0.5317	2	0.6889
Methionine	-11.5151	5	<0.0001
O-Phosphocholine	2.6808	3	0.075
Ornithine	-0.5919	5	0.5797
Phenylalanine	-1.8033	6	0.1214	1.6026	2	4	0.3082
(O-)Phosphoserine	-0.5273	3	0.6345
Potassium	-1.7538	11	0.1176									39.7932	2	7	<0.0001
Proline	-3.3108	9	0.0091	6.0649	2	7	0.0296					2.9489	3	6	0.1203
Serine	-3.1673	17	0.0056	18.0732	2	12	0.0002					14.3575	4	12	0.0002
Sodium	-3.4867	7	0.0252									75.347	2	4	<0.0001
Taurine	-6.4261	31	<0.0001									13.0932	3	16	0.0001
Threonine	-2.0387	11	0.0662	4.4748	2	8	0.0496					35.3665	3	6	0.0003
Total Organics	-7.8171	25	<0.0001	16.1703	3	23	<0.0001	21.2902	2	16	<0.0001	29.3042	4	21	<0.0001
Tyrosine	-4.7657	4	0.0089
Valine	-2.6744	5	0.0441
* df for overall model = no. of cluster - no. of coefficients (here = 1)
