# Supplementary material for: Acclimation of marine invertebrate osmolyte systems to low salinity: A systematic review & meta-analysis
Source: Frontiers journal article supplement (doi:10.3389/fmars.2022.934378), 2022-09-02
Supplement: Table_5.XLSX [file Table_5.XLSX]

## Sheet: Method.Moderators2
Table S5 - Outcome of the meta-regression results for the moderator variables. Moderator variables were magnitude of salinity stress and expermental duration (including and excluding in situ studies). The p-value denotes whether an effect significantly influenced effect size (*), or whether it was non significant (ns). Q denotes whether the methodological moderator explained all variance in effec…
		Overall		Magnitude		Duration (with in situ)		Duration (without in situ)
ID	Outcome	p	Q	p	Q	p	Q	p	Q
1	Alanine	*	Q	*	Q	ns	Q	ns	Q
2	Arginine	ns	Q	ns	Q	ns	Q	ns	Q
3	Ammonia	*	ns	ns	ns	ns	ns	*	ns
4	Asparagine	ns	ns	NA	NA	NA	NA	NA	NA
5	Aspartate	ns	Q	ns	Q	ns	Q	ns	Q
6	Betaine	*	Q	ns	Q	NA	NA	ns	Q
7	Chloride	ns	Q	ns	Q	NA	NA	ns	Q
8	Glutamate	*	Q	ns	Q	*	Q	ns	Q
9	Glutamine	*	ns	ns	ns	NA	NA	ns	ns
10	Glycine	*	Q	ns	Q	ns	Q	ns	Q
11	Histidine	ns	ns	NA	NA	NA	NA	NA	NA
12	Isoleucine	ns	Q	ns	Q	ns	Q	ns	Q
13	Leucine	ns	Q	*	ns	ns	Q	ns	Q
14	Lysine	ns	ns	ns	ns	ns	ns	ns	ns
15	Magnesium	ns	Q	ns	Q	NA	NA	ns	Q
16	Methionine	*	ns	ns	ns	ns	ns	ns	ns
17	O-Phosphocholine	ns	ns	ns	ns	NA	NA	ns	ns
18	Ornithine	ns	Q	ns	Q	ns	Q	ns	Q
19	Phenylalanine	ns	Q	ns	Q	ns	Q	ns	Q
20	(O-)Phosphoserine	ns	ns	ns	ns	NA	NA	ns	ns
21	Potassium	ns	Q	*	ns	NA	NA	*	ns
22	Proline	*	Q	*	Q	ns	Q	ns	Q
23	Serine	*	Q	ns	Q	ns	Q	ns	Q
24	Sodium	*	Q	ns	Q	NA	NA	ns	Q
25	Taurine	*	Q	ns	Q	*	Q	ns	Q
26	Threonine	ns	Q	ns	Q	ns	Q	ns	Q
27	Total Organics	*	Q	ns	Q	ns	Q	ns	Q
28	Tyrosine	*	ns	ns	ns	ns	ns	ns	ns
29	Valine	*	ns	*	ns	*	ns	ns	ns
